# Supplementary material for: The use of electrostatic potential at nuclei in the analysis of halogen bonding
Source: Royal Society of Chemistry journal article supplement (doi:10.1039/d2nj00256f), 2022-01-01
Supplement: d2nj00256f1.pdf [file d2nj00256f1.pdf]

## The Use of Electrostatic Potentials at Nuclei in the Analysis of Halogen Bonding

### Supplementary Information

Vilakkathala U. Krishnapriya<sup>a, b</sup> and Cherumuttathu H. Suresh<sup>\*a, b</sup>

<sup>a</sup>Chemical Science and Technology Division, CSIR-National Institute of Interdisciplinary Science and Technology, Thiruvananthapuram - 695019, Kerala, India

<sup>b</sup>Research Centre, University of Kerala, Thiruvananthapuram, 34, Kerala, India

| Table of contents |                                                                                                                                                                                                                                                                              | Page No. |
|-------------------|------------------------------------------------------------------------------------------------------------------------------------------------------------------------------------------------------------------------------------------------------------------------------|----------|
| Table S1          | Change in MESP at the nuclei of donor and acceptor atoms of the remaining ammonia- halogen bonded complexes along with their BSSE corrected binding energy at M06-2X/aug-cc-pVTZ level of theory. All values are in kcal/mol.                                                | S2       |
| Table S2          | Change in MESP at the nuclei of donor and acceptor atoms of the remaining pyridine- halogen bonded complexes along with their BSSE corrected binding energy at M06-2X/aug-cc-pVTZ level of theory. All values are in kcal/mol.                                               | S3       |
| Table S3          | BSSE values of halogen bonded NH <sub>3</sub> complexes at M06-2X/aug-cc-pVTZ level of theory. Values are in a.u.                                                                                                                                                            | S4       |
| Table S4          | BSSE values of halogen bonded pyridine complexes at M06-2X/aug-cc-pVTZ level of theory. Values are in a.u.                                                                                                                                                                   | S5       |
| Table S5          | BSSE values of halogen bonded HCN, H <sub>2</sub> O and (CH <sub>3</sub> ) <sub>2</sub> O complexes at M06-2X/aug-cc-pVTZ level of theory. Values are in a.u.                                                                                                                | S6       |
| Table S6          | Cartesian coordinates in (Å) and energy data (a.u.) of halogen bonded NH <sub>3</sub> complexes at M06-2X/aug-cc-pVTZ level of theory. All the optimized structures are corresponding to minima on the potential energy surface.                                             | S7       |
| Table S7          | Cartesian coordinates in (Å) and energy data (a.u.) of halogen bonded pyridine complexes at M06-2X/aug-cc-pVTZ level of theory. All the optimized structures are corresponding to minima on the potential energy surface.                                                    | S24      |
| Table S8          | Cartesian coordinates in (Å) and energy data (a.u.) of halogen bonded HCN, H <sub>2</sub> O and (CH <sub>3</sub> ) <sub>2</sub> O complexes at M06-2X/aug-cc-pVTZ level of theory. All the optimized structures are corresponding to minima on the potential energy surface. | S44      |

**Table S1:** Change in MESP at the nuclei of donor and acceptor atoms of the remaining ammonia- halogen bonded complexes along with their BSSE corrected binding energy at M06-2X/aug-cc-pVTZ level of theory. All values are in kcal/mol.

| Complex                                                            | $\Delta V_{n-D}$ | $\Delta V_{n-A}$ | $\Delta\Delta V_n$ | $E_{BSSE}$ | Complex                                                            | $\Delta V_{n-D}$ | $\Delta V_{n-A}$ | $\Delta\Delta V_n$ | $E_{BSSE}$ |
|--------------------------------------------------------------------|------------------|------------------|--------------------|------------|--------------------------------------------------------------------|------------------|------------------|--------------------|------------|
| H <sub>3</sub> N...BrCF <sub>3</sub>                               | 12.1             | -11.2            | 23.3               | -3.6       | H <sub>3</sub> N...ClCCH                                           | 6.7              | -12.3            | 18.9               | -2.4       |
| H <sub>3</sub> N...BrOCH <sub>3</sub>                              | 17.7             | -15.7            | 33.4               | -6.2       | H <sub>3</sub> N...ClCHCH <sub>2</sub>                             | -0.4             | -9.4             | 9.0                | -0.6       |
| H <sub>3</sub> N...BrCCH                                           | 10.6             | -12.6            | 23.3               | -3.8       | H <sub>3</sub> N...Cl <sub>2</sub>                                 | 16.4             | -15.4            | 31.8               | -4.9       |
| H <sub>3</sub> N...BrCHCH <sub>2</sub>                             | 2.4              | -10.0            | 12.4               | -1.5       | H <sub>3</sub> N...ClCN                                            | 16.0             | -14.7            | 30.7               | -4.3       |
| H <sub>3</sub> N...Br <sub>2</sub>                                 | 25.1             | -14.2            | 39.3               | -6.6       | H <sub>3</sub> N...ClOCH <sub>3</sub>                              | 9.1              | -14.4            | 23.4               | -3.7       |
| H <sub>3</sub> N...BrF                                             | 49.6             | -29.3            | 78.9               | -14.4      | H <sub>3</sub> N...ClOF                                            | 22.4             | -19.8            | 42.2               | -6.9       |
| H <sub>3</sub> N...BrCN                                            | 21.1             | -15.2            | 36.3               | -6.0       | H <sub>3</sub> N...ClC <sub>6</sub> H <sub>5</sub>                 | -0.2             | -9.0             | 8.7                | -0.6       |
| H <sub>3</sub> N...BrOF                                            | 37.4             | -22.5            | 59.9               | -10.3      | H <sub>3</sub> N...ClC <sub>6</sub> H <sub>4</sub> F               | 1.4              | -9.0             | 10.4               | -0.8       |
| H <sub>3</sub> N...BrC <sub>6</sub> H <sub>4</sub> F               | 4.4              | -9.7             | 14.1               | -1.8       | H <sub>3</sub> N...ClC <sub>6</sub> H <sub>4</sub> Cl              | 2.1              | -9.1             | 11.2               | -0.9       |
| H <sub>3</sub> N...BrC <sub>6</sub> H <sub>4</sub> Cl              | 5.0              | -9.6             | 14.6               | -1.9       | H <sub>3</sub> N...ClCH <sub>2</sub> CH <sub>3</sub>               | -3.5             | -8.4             | 4.9                | 0.1        |
| H <sub>3</sub> N...BrCH <sub>2</sub> CH <sub>3</sub>               | -0.9             | -9.0             | 8.1                | -0.7       | H <sub>3</sub> N...ClH                                             | 0.4              | -12.0            | 12.4               | -0.8       |
| H <sub>3</sub> N...BrH                                             | 3.8              | -12.2            | 16.0               | -1.9       | H <sub>3</sub> N...ClOCClH <sub>2</sub>                            | 15.7             | -14.8            | 30.5               | -5.2       |
| H <sub>3</sub> N...BrCH <sub>2</sub> CH <sub>2</sub> Br            | 3.9              | -9.2             | 13.1               | -1.5       | H <sub>3</sub> N...ClOClBr <sub>3</sub>                            | 32.2             | -14.6            | 46.8               | -7.5       |
| H <sub>3</sub> N...BrOCBr <sub>3</sub>                             | 60.3             | -14.7            | 75.0               | -12.9      | H <sub>3</sub> N...ClC <sub>6</sub> H <sub>4</sub> NO <sub>2</sub> | 6.2              | -9.2             | 15.4               | -1.5       |
| H <sub>3</sub> N...BrC <sub>6</sub> H <sub>4</sub> Br              | 5.2              | -9.5             | 14.7               | -1.9       | H <sub>3</sub> N...ClOCl                                           | 21.2             | -17.8            | 39.0               | -6.4       |
| H <sub>3</sub> N...BrC <sub>6</sub> H <sub>4</sub> NO <sub>2</sub> | 9.4              | -9.8             | 19.2               | -2.5       | H <sub>3</sub> N...ClOBr                                           | 19.4             | -16.6            | 36.0               | -6.0       |
| H <sub>3</sub> N...BrOCl                                           | 38.8             | -20.4            | 59.2               | -10.0      | H <sub>3</sub> N...ClOCHCl <sub>2</sub>                            | 21.5             | -15.6            | 37.1               | -6.3       |
| H <sub>3</sub> N...BrOCHCl <sub>2</sub>                            | 41.2             | -17.4            | 58.7               | -10.3      | H <sub>3</sub> N...ClOCHF <sub>2</sub>                             | 19.0             | -16.9            | 35.9               | -6.2       |
| H <sub>3</sub> N...BrOCHF <sub>2</sub>                             | 37.9             | -19.6            | 57.5               | -9.9       | H <sub>3</sub> N...ClOCClF <sub>2</sub>                            | 29.7             | -16.9            | 46.6               | -7.6       |
| H <sub>3</sub> N...BrOCClF <sub>2</sub>                            | 53.6             | -19.0            | 72.6               | -12.5      | H <sub>3</sub> N...ClOCCl <sub>3</sub>                             | 29.0             | -17.4            | 46.4               | -7.4       |
| H <sub>3</sub> N...BrOCCl <sub>3</sub>                             | 56.1             | -16.8            | 73.0               | -12.5      | H <sub>3</sub> N...ClNO <sub>2</sub> BeCl <sub>2</sub>             | 47.0             | -9.8             | 56.8               | -10.2      |
| H <sub>3</sub> N...BrOCF <sub>3</sub>                              | 53.2             | -21.4            | 74.6               | -12.9      | H <sub>3</sub> N...ClC <sub>3</sub> N                              | 15.7             | -15.7            | 31.4               | -3.9       |
| H <sub>3</sub> N...BrCH <sub>3</sub>                               | -0.1             | -9.5             | 9.4                | -1.0       | H <sub>3</sub> N...ClC <sub>5</sub> N                              | 15.5             | -12.7            | 28.3               | -3.8       |
| H <sub>3</sub> N...BrCNBeCl <sub>2</sub>                           | 39.2             | -17.3            | 56.5               | -9.6       | H <sub>3</sub> N...FCN                                             | 5.9              | -11.8            | 17.7               | -1.0       |
| H <sub>3</sub> N...BrC <sub>3</sub> N                              | 20.4             | -13.5            | 33.9               | -5.5       | H <sub>3</sub> N...FNO <sub>2</sub> BeCl <sub>2</sub>              | 11.2             | -10.7            | 21.9               | -1.8       |
| H <sub>3</sub> N...BrC <sub>5</sub> N                              | 20.2             | -12.7            | 32.9               | -5.4       | H <sub>3</sub> N...FNCBeCl <sub>2</sub>                            | 17.5             | -6.1             | 23.6               | -2.9       |
| H <sub>3</sub> N...BrNO <sub>2</sub> BeCl <sub>2</sub>             | 72.6             | -18.5            | 91.2               | -15.3      | H <sub>3</sub> N...FC <sub>3</sub> N                               | 6.0              | -9.0             | 15.0               | -0.9       |

**Table S2:** Change in MESP at the nuclei of donor and acceptor atoms of the remaining pyridine- halogen bonded complexes along with their BSSE corrected binding energy at M06-2X/aug-cc-pVTZ level of theory. All values are in kcal/mol.

| Complex                                                                           | $\Delta V_{n-D}$ | $\Delta V_{n-A}$ | $\Delta\Delta V_n$ | $E_{BSSE}$ | Complex                                                                           | $\Delta V_{n-D}$ | $\Delta V_{n-A}$ | $\Delta\Delta V_n$ | $E_{BSSE}$ |
|-----------------------------------------------------------------------------------|------------------|------------------|--------------------|------------|-----------------------------------------------------------------------------------|------------------|------------------|--------------------|------------|
| C <sub>5</sub> H <sub>5</sub> N...BrOCH <sub>3</sub>                              | 15.6             | -17.3            | 32.9               | -6.8       | C <sub>5</sub> H <sub>5</sub> N...ClCCH                                           | 4.9              | -13.0            | 17.9               | -2.6       |
| C <sub>5</sub> H <sub>5</sub> N...BrCCH                                           | 8.0              | -13.3            | 21.3               | -4.1       | C <sub>5</sub> H <sub>5</sub> N...ClF                                             | 37.4             | -35.1            | 72.6               | -11.8      |
| C <sub>5</sub> H <sub>5</sub> N...BrCHCH <sub>2</sub>                             | 1.1              | -8.4             | 9.5                | -1.9       | C <sub>5</sub> H <sub>5</sub> N...ClOH                                            | 8.4              | -17.3            | 25.8               | -4.7       |
| C <sub>5</sub> H <sub>5</sub> N...Br <sub>2</sub>                                 | 24.5             | -16.5            | 41.0               | -7.3       | C <sub>5</sub> H <sub>5</sub> N...ClOF                                            | 19.1             | -22.5            | 41.5               | -7.5       |
| C <sub>5</sub> H <sub>5</sub> N...BrOF                                            | 34.9             | -26.6            | 61.5               | -7.6       | C <sub>5</sub> H <sub>5</sub> N...ClC <sub>6</sub> H <sub>5</sub>                 | -3.2             | -2.5             | 0.7                | -1.1       |
| C <sub>5</sub> H <sub>5</sub> N...BrC <sub>6</sub> H <sub>5</sub>                 | -3.4             | -1.3             | 2.1                | -1.5       | C <sub>5</sub> H <sub>5</sub> N...ClC <sub>6</sub> H <sub>4</sub> F               | -3.3             | -0.9             | 2.4                | -1.2       |
| C <sub>5</sub> H <sub>5</sub> N...BrC <sub>6</sub> H <sub>4</sub> Cl              | 0.5              | -3.5             | 4.0                | -11.7      | C <sub>5</sub> H <sub>5</sub> N...ClC <sub>6</sub> H <sub>4</sub> Cl              | -3.5             | -0.4             | 3.1                | -1.2       |
| C <sub>5</sub> H <sub>5</sub> N...BrH                                             | 2.6              | -12.1            | 14.7               | -2.1       | C <sub>5</sub> H <sub>5</sub> N...ClH                                             | -12.1            | -0.1             | 12.0               | -0.9       |
| C <sub>5</sub> H <sub>5</sub> N...BrOCClH <sub>2</sub>                            | 27.6             | -19.3            | 46.9               | -1.6       | C <sub>5</sub> H <sub>5</sub> N...ClCH <sub>2</sub> CH <sub>2</sub> Br            | -6.9             | -0.1             | 6.8                | -1.1       |
| C <sub>5</sub> H <sub>5</sub> N...BrCH <sub>2</sub> CH <sub>2</sub> Br            | 2.6              | -7.7             | 10.3               | -2.2       | C <sub>5</sub> H <sub>5</sub> N...ClC <sub>6</sub> H <sub>4</sub> Br              | -3.5             | -0.3             | 3.2                | -1.2       |
| C <sub>5</sub> H <sub>5</sub> N...BrC <sub>6</sub> H <sub>4</sub> Br              | 0.9              | -3.8             | 4.7                | -9.4       | C <sub>5</sub> H <sub>5</sub> N...ClC <sub>6</sub> H <sub>4</sub> NO <sub>2</sub> | 3.0              | -3.7             | 6.7                | -1.4       |
| C <sub>5</sub> H <sub>5</sub> N...BrC <sub>6</sub> H <sub>4</sub> NO <sub>2</sub> | 4.3              | -4.1             | 8.4                | -1.8       | C <sub>5</sub> H <sub>5</sub> N...ClOBr                                           | 17.0             | -18.6            | 35.6               | -6.6       |
| C <sub>5</sub> H <sub>5</sub> N...BrOCl                                           | 35.7             | -23.7            | 59.3               | -15.8      | C <sub>5</sub> H <sub>5</sub> N...ClOCHF <sub>2</sub>                             | 17.3             | -19.2            | 36.5               | -6.7       |
| C <sub>5</sub> H <sub>5</sub> N...BrOBr                                           | 34.7             | -22.1            | 56.8               | -1.7       | C <sub>5</sub> H <sub>5</sub> N...ClOCF <sub>3</sub>                              | 33.7             | -24.0            | 57.7               | -9.0       |
| C <sub>5</sub> H <sub>5</sub> N...BrOCH <sub>2</sub> F                            | 24.6             | -20.0            | 44.5               | -2.0       | C <sub>5</sub> H <sub>5</sub> N...ClCNBeCl <sub>2</sub>                           | 25.4             | -17.9            | 43.2               | -7.9       |
| C <sub>5</sub> H <sub>5</sub> N...BrOCHF <sub>2</sub>                             | 36.3             | -23.1            | 59.4               | -11.5      | C <sub>5</sub> H <sub>5</sub> N...ClC <sub>3</sub> N                              | 12.4             | -13.9            | 26.3               | -4.2       |
| C <sub>5</sub> H <sub>5</sub> N...BrOCF <sub>2</sub> Cl                           | 50.8             | -22.3            | 73.2               | -10.9      | C <sub>5</sub> H <sub>5</sub> N...ClC <sub>5</sub> N                              | 12.3             | -13.0            | 25.3               | -4.1       |
| C <sub>5</sub> H <sub>5</sub> N...BrOCF <sub>3</sub>                              | 50.0             | -25.4            | 75.3               | -9.0       | C <sub>5</sub> H <sub>5</sub> N...FCN                                             | 4.6              | -10.9            | 15.6               | -1.1       |
| C <sub>5</sub> H <sub>5</sub> N...BrCNBeCl <sub>2</sub>                           | 32.0             | -20.0            | 52.0               | -12.0      | C <sub>5</sub> H <sub>5</sub> N...FCNBeCl <sub>2</sub>                            | 14.3             | -12.7            | 27.0               | -3.1       |
| C <sub>5</sub> H <sub>5</sub> N...BrC <sub>3</sub> N                              | 16.1             | -14.7            | 30.7               | -11.4      | C <sub>5</sub> H <sub>5</sub> N...FC <sub>3</sub> N                               | 5.0              | -9.6             | 14.7               | -1.0       |
| C <sub>5</sub> H <sub>5</sub> N...BrC <sub>5</sub> N                              | 16.0             | -13.8            | 29.8               | -5.8       | C <sub>5</sub> H <sub>5</sub> N...FC <sub>5</sub> N                               | 5.0              | -9.0             | 14.0               | -0.9       |

**Table S3:** BSSE values of halogen bonded NH<sub>3</sub> complexes at M06-2X/aug-cc-pVTZ level of theory. Values are in a.u.

| Complex                                                            | BSSE value | Complex                                                            | BSSE value |
|--------------------------------------------------------------------|------------|--------------------------------------------------------------------|------------|
| H <sub>3</sub> N...BrCF <sub>3</sub>                               | 0.00019    | H <sub>3</sub> N...ClCF <sub>3</sub>                               | 0.00011    |
| H <sub>3</sub> N...BrOCH <sub>3</sub>                              | 0.00010    | H <sub>3</sub> N...ClCCH                                           | 0.00013    |
| H <sub>3</sub> N...BrCCH                                           | 0.00020    | H <sub>3</sub> N...ClCHCH <sub>2</sub>                             | 0.00005    |
| H <sub>3</sub> N...BrCHCH <sub>2</sub>                             | 0.00007    | H <sub>3</sub> N...Cl <sub>2</sub>                                 | 0.00018    |
| H <sub>3</sub> N...Br <sub>2</sub>                                 | 0.00000    | H <sub>3</sub> N...ClCN                                            | 0.00018    |
| H <sub>3</sub> N...BrF                                             | 0.00036    | H <sub>3</sub> N...ClOCH <sub>3</sub>                              | 0.00010    |
| H <sub>3</sub> N...BrCN                                            | 0.00019    | H <sub>3</sub> N...ClOF                                            | 0.00019    |
| H <sub>3</sub> N...BrOF                                            | 0.00027    | H <sub>3</sub> N...ClC <sub>6</sub> H <sub>5</sub>                 | 0.00007    |
| H <sub>3</sub> N...BrC <sub>6</sub> H <sub>5</sub>                 | 0.00010    | H <sub>3</sub> N...ClC <sub>6</sub> H <sub>4</sub> F               | 0.00007    |
| H <sub>3</sub> N...BrC <sub>6</sub> H <sub>4</sub> NH <sub>2</sub> | 0.00010    | H <sub>3</sub> N...ClC <sub>6</sub> H <sub>4</sub> Cl              | 0.00008    |
| H <sub>3</sub> N...BrC <sub>6</sub> H <sub>4</sub> F               | 0.00011    | H <sub>3</sub> N...ClCH <sub>2</sub> CH <sub>3</sub>               | 0.00005    |
| H <sub>3</sub> N...BrC <sub>6</sub> H <sub>4</sub> Cl              | 0.00011    | H <sub>3</sub> N...ClH                                             | 0.00006    |
| H <sub>3</sub> N...BrCH <sub>2</sub> CH <sub>3</sub>               | 0.00009    | H <sub>3</sub> N...ClOCCI <sub>2</sub>                             | 0.00015    |
| H <sub>3</sub> N...BrH                                             | 0.00013    | H <sub>3</sub> N...ClOCBr <sub>3</sub>                             | 0.00017    |
| H <sub>3</sub> N...BrOCH <sub>2</sub> Cl                           | 0.00021    | H <sub>3</sub> N...ClCCl <sub>3</sub>                              | 0.00015    |
| H <sub>3</sub> N...BrCH <sub>2</sub> CH <sub>2</sub> Br            | 0.00010    | H <sub>3</sub> N...ClPhBr                                          | 0.00008    |
| H <sub>3</sub> N...BrOCBr <sub>3</sub>                             | 0.00025    | H <sub>3</sub> N...ClC <sub>6</sub> H <sub>4</sub> NO <sub>2</sub> | 0.00008    |
| H <sub>3</sub> N...BrC <sub>6</sub> H <sub>4</sub> Br              | 0.00011    | H <sub>3</sub> N...ClOCl                                           | 0.00013    |
| H <sub>3</sub> N...BrC <sub>6</sub> H <sub>4</sub> NO <sub>2</sub> | 0.00011    | H <sub>3</sub> N...ClOBr                                           | 0.00013    |
| H <sub>3</sub> N...BrOCl                                           | 0.00022    | H <sub>3</sub> N...ClOCHCl <sub>2</sub>                            | 0.00018    |
| H <sub>3</sub> N...BrOBr                                           | 0.00024    | H <sub>3</sub> N...ClOCHF <sub>2</sub>                             | 0.00008    |
| H <sub>3</sub> N...BrOCHCl <sub>2</sub>                            | 0.00027    | H <sub>3</sub> N...ClOCCIF <sub>2</sub>                            | 0.00018    |
| H <sub>3</sub> N...BrOCHF <sub>2</sub>                             | 0.00023    | H <sub>3</sub> N...ClOCCl <sub>3</sub>                             | 0.00012    |
| H <sub>3</sub> N...BrOCCIF <sub>2</sub>                            | 0.00022    | H <sub>3</sub> N...ClOCF <sub>3</sub>                              | 0.00012    |
| H <sub>3</sub> N...BrOCCl <sub>3</sub>                             | 0.00030    | H <sub>3</sub> N...ClNO <sub>2</sub> BeCl <sub>2</sub>             | 0.00021    |
| H <sub>3</sub> N...BrOCF <sub>3</sub>                              | 0.00024    | H <sub>3</sub> N...ClC <sub>3</sub> N                              | 0.00017    |
| H <sub>3</sub> N...BrCH <sub>3</sub>                               | 0.00013    | H <sub>3</sub> N...ClC <sub>5</sub> N                              | 0.00014    |
| H <sub>3</sub> N...BrCNBeCl <sub>2</sub>                           | 0.00017    | H <sub>3</sub> N...FCN                                             | 0.00010    |
| H <sub>3</sub> N...BrC <sub>3</sub> N                              | 0.00020    | H <sub>3</sub> N...FNO <sub>2</sub> BeCl <sub>2</sub>              | 0.00013    |
| H <sub>3</sub> N...BrC <sub>5</sub> N                              | 0.00016    | H <sub>3</sub> N...FNCBeCl <sub>2</sub>                            | 0.00018    |
| H <sub>3</sub> N...BrNO <sub>2</sub> BeCl <sub>2</sub>             | 0.00024    | H <sub>3</sub> N...FC <sub>3</sub> N                               | 0.00009    |

**Table S4:** BSSE values of halogen bonded pyridine complexes at M06-2X/aug-cc-pVTZ level of theory. Values are in a.u.

| Complex                                                                           | BSSE value | Complex                                                                           | BSSE value |
|-----------------------------------------------------------------------------------|------------|-----------------------------------------------------------------------------------|------------|
| C <sub>5</sub> H <sub>5</sub> N...BrCF <sub>3</sub>                               | 0.00030    | C <sub>5</sub> H <sub>5</sub> N...ClCF <sub>3</sub>                               | 0.00024    |
| C <sub>5</sub> H <sub>5</sub> N...BrOCH <sub>3</sub>                              | 0.00023    | C <sub>5</sub> H <sub>5</sub> N...ClCCH                                           | 0.00022    |
| C <sub>5</sub> H <sub>5</sub> N...BrCCH                                           | 0.00031    | C <sub>5</sub> H <sub>5</sub> N...ClF                                             | 0.00056    |
| C <sub>5</sub> H <sub>5</sub> N...BrCHCH <sub>2</sub>                             | 0.00018    | C <sub>5</sub> H <sub>5</sub> N...ClCN                                            | 0.00030    |
| C <sub>5</sub> H <sub>5</sub> N...Br <sub>2</sub>                                 | 0.00033    | C <sub>5</sub> H <sub>5</sub> N...ClOH                                            | 0.00024    |
| C <sub>5</sub> H <sub>5</sub> N...BrCN                                            | 0.00030    | C <sub>5</sub> H <sub>5</sub> N...ClOF                                            | 0.00037    |
| C <sub>5</sub> H <sub>5</sub> N...BrOH                                            | 0.00027    | C <sub>5</sub> H <sub>5</sub> N...ClC <sub>6</sub> H <sub>5</sub>                 | 0.00022    |
| C <sub>5</sub> H <sub>5</sub> N...BrOF                                            | 0.00056    | C <sub>5</sub> H <sub>5</sub> N...ClC <sub>6</sub> H <sub>4</sub> F               | 0.00023    |
| C <sub>5</sub> H <sub>5</sub> N...BrC <sub>6</sub> H <sub>5</sub>                 | 0.00026    | C <sub>5</sub> H <sub>5</sub> N...ClC <sub>6</sub> H <sub>4</sub> Cl              | 0.00023    |
| C <sub>5</sub> H <sub>5</sub> N...BrC <sub>6</sub> H <sub>4</sub> Cl              | 0.00022    | C <sub>5</sub> H <sub>5</sub> N...ClH                                             | 0.00012    |
| C <sub>5</sub> H <sub>5</sub> N...BrH                                             | 0.00019    | C <sub>5</sub> H <sub>5</sub> N...ClCH <sub>2</sub> CH <sub>2</sub> Br            | 0.00016    |
| C <sub>5</sub> H <sub>5</sub> N...BrOCClH <sub>2</sub>                            | 0.00039    | C <sub>5</sub> H <sub>5</sub> N...ClC <sub>6</sub> H <sub>4</sub> Br              | 0.00024    |
| C <sub>5</sub> H <sub>5</sub> N...BrCH <sub>2</sub> CH <sub>2</sub> Br            | 0.00020    | C <sub>5</sub> H <sub>5</sub> N...ClC <sub>6</sub> H <sub>4</sub> NO <sub>2</sub> | 0.00026    |
| C <sub>5</sub> H <sub>5</sub> N...BrCCl <sub>3</sub>                              | 0.00034    | C <sub>5</sub> H <sub>5</sub> N...ClOBr                                           | 0.00034    |
| C <sub>5</sub> H <sub>5</sub> N...BrC <sub>6</sub> H <sub>4</sub> Br              | 0.00026    | C <sub>5</sub> H <sub>5</sub> N...ClOCH <sub>2</sub> F                            | 0.00026    |
| C <sub>5</sub> H <sub>5</sub> N...BrC <sub>6</sub> H <sub>4</sub> NO <sub>2</sub> | 0.00025    | C <sub>5</sub> H <sub>5</sub> N...ClOCHF <sub>2</sub>                             | 0.00032    |
| C <sub>5</sub> H <sub>5</sub> N...BrOCl                                           | 0.00052    | C <sub>5</sub> H <sub>5</sub> N...ClOCF <sub>2</sub> Cl                           | 0.00045    |
| C <sub>5</sub> H <sub>5</sub> N...BrOBr                                           | 0.00059    | C <sub>5</sub> H <sub>5</sub> N...ClOCF <sub>3</sub>                              | 0.00045    |
| C <sub>5</sub> H <sub>5</sub> N...BrOCH <sub>2</sub> F                            | 0.00040    | C <sub>5</sub> H <sub>5</sub> N...ClCNBeCl <sub>2</sub>                           | 0.00035    |
| C <sub>5</sub> H <sub>5</sub> N...BrOCHF <sub>2</sub>                             | 0.00051    | C <sub>5</sub> H <sub>5</sub> N...ClC <sub>3</sub> N                              | 0.00028    |
| C <sub>5</sub> H <sub>5</sub> N...BrOCF <sub>2</sub> Cl                           | 0.00053    | C <sub>5</sub> H <sub>5</sub> N...ClC <sub>5</sub> N                              | 0.00023    |
| C <sub>5</sub> H <sub>5</sub> N...BrOCF <sub>3</sub>                              | 0.00059    | C <sub>5</sub> H <sub>5</sub> N...FCN                                             | 0.00016    |
| C <sub>5</sub> H <sub>5</sub> N...BrCNBeCl <sub>2</sub>                           | 0.00025    | C <sub>5</sub> H <sub>5</sub> N...FCNBeCl <sub>2</sub>                            | 0.00030    |
| C <sub>5</sub> H <sub>5</sub> N...BrC <sub>3</sub> N                              | 0.00032    | C <sub>5</sub> H <sub>5</sub> N...FC <sub>3</sub> N                               | 0.00016    |
| C <sub>5</sub> H <sub>5</sub> N...BrC <sub>5</sub> N                              | 0.00027    | C <sub>5</sub> H <sub>5</sub> N...FC <sub>5</sub> N                               | 0.00013    |

**Table S5:** BSSE values of halogen bonded HCN, H<sub>2</sub>O and (CH<sub>3</sub>)<sub>2</sub>O complexes at M06-2X/aug-cc-pVTZ level of theory. Values are in a.u.

| Complex                                               | BSSE value | Complex                                                                             | BSSE value |
|-------------------------------------------------------|------------|-------------------------------------------------------------------------------------|------------|
| HCN...BrCHCH <sub>2</sub>                             | 0.00018    | H <sub>2</sub> O...BrOCF <sub>3</sub>                                               | 0.00002    |
| HCN...Br <sub>2</sub>                                 | 0.00023    | H <sub>2</sub> O...FOCl                                                             | 0.00015    |
| HCN...BrF                                             | 0.00024    | H <sub>2</sub> O...ClF                                                              | 0.00013    |
| HCN...BrCH <sub>2</sub> CH <sub>2</sub> Br            | 0.00020    | H <sub>2</sub> O...ClOCBr <sub>3</sub>                                              | 0.00016    |
| HCN...BrCNBeCl <sub>2</sub>                           | 0.00036    | (CH <sub>3</sub> ) <sub>2</sub> O...BrCCH                                           | 0.00036    |
| HCN...ClOCl                                           | 0.00026    | (CH <sub>3</sub> ) <sub>2</sub> O...BrC <sub>6</sub> H <sub>4</sub> F               | 0.00016    |
| HCN...ClOCHCl <sub>2</sub>                            | 0.00027    | (CH <sub>3</sub> ) <sub>2</sub> O...BrC <sub>6</sub> H <sub>4</sub> NO <sub>2</sub> | 0.00017    |
| HCN...ClCNBeCl <sub>2</sub>                           | 0.00040    | (CH <sub>3</sub> ) <sub>2</sub> O...ClCCH                                           | 0.00026    |
| H <sub>2</sub> O...BrOF                               | 0.00015    | (CH <sub>3</sub> ) <sub>2</sub> O...ClC <sub>6</sub> H <sub>4</sub> Cl              | 0.00017    |
| H <sub>2</sub> O...BrC <sub>6</sub> H <sub>4</sub> Cl | 0.00011    | (CH <sub>3</sub> ) <sub>2</sub> O...ClC <sub>6</sub> H <sub>4</sub> NO <sub>2</sub> | 0.00018    |
| H <sub>2</sub> O...BrOCl                              | 0.00012    | (CH <sub>3</sub> ) <sub>2</sub> O...ClOBr                                           | 0.00038    |
| H <sub>2</sub> O...BrOCCl <sub>3</sub>                | 0.00009    | (CH <sub>3</sub> ) <sub>2</sub> O...ClC <sub>3</sub> N                              | 0.00025    |

**Table S6:** Cartesian coordinates in (Å) and energy data (a.u.) of halogen bonded NH<sub>3</sub> complexes at M06-2X/aug-cc-pVTZ level of theory. All the optimized structures are corresponding to minima on the potential energy surface.

| <b>H<sub>3</sub>N...BrCF<sub>3</sub></b>                                            |            |            |            | <b>H<sub>3</sub>N...BrOCH<sub>3</sub></b>                                             |            |            |            |
|-------------------------------------------------------------------------------------|------------|------------|------------|---------------------------------------------------------------------------------------|------------|------------|------------|
| 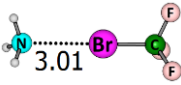   |            |            |            |    |            |            |            |
| SCF E = -2968.4659<br>ZPE = -2968.4152<br>G = -2968.4519<br>H = -2968.4053          |            |            |            | SCF E = -2745.8728<br>ZPE = -2745.7943<br>G = -2745.8290<br>H = -2745.7854            |            |            |            |
| 35                                                                                  | -0.5770800 | 0.0006620  | 0.0008540  | 35                                                                                    | -0.1667590 | -0.1667230 | -0.0000190 |
| 7                                                                                   | -3.5891960 | -0.0010400 | -0.0006680 | 7                                                                                     | -2.8392910 | 0.3249770  | 0.0000320  |
| 1                                                                                   | -3.9606050 | -0.5888070 | -0.7365780 | 1                                                                                     | -3.1162330 | 0.8590650  | -0.8136000 |
| 1                                                                                   | -3.9642930 | 0.9287470  | -0.1411290 | 1                                                                                     | -3.1191190 | 0.8423150  | 0.8234150  |
| 1                                                                                   | -3.9613360 | -0.3457330 | 0.8754190  | 1                                                                                     | -3.3532880 | -0.5465510 | -0.0097880 |
| 6                                                                                   | 1.3473140  | -0.0003900 | -0.0001720 | 8                                                                                     | 1.6263500  | -0.5344780 | 0.0000480  |
| 9                                                                                   | 1.8184330  | -0.7565590 | -0.9831850 | 6                                                                                     | 2.4034690  | 0.6448090  | 0.0000050  |
| 9                                                                                   | 1.8182630  | 1.2289460  | -0.1643170 | 1                                                                                     | 2.2129520  | 1.2485230  | 0.8906950  |
| 9                                                                                   | 1.8215840  | -0.4732470 | 1.1450690  | 1                                                                                     | 3.4425270  | 0.3157800  | 0.0001650  |
|                                                                                     |            |            |            | 1                                                                                     | 2.2131610  | 1.2483170  | -0.8908720 |
| <b>H<sub>3</sub>N...BrCCH</b>                                                       |            |            |            | <b>H<sub>3</sub>N...BrCHCH<sub>2</sub></b>                                            |            |            |            |
|  |            |            |            |  |            |            |            |
| SCF E = -2707.5211<br>ZPE = -2707.4660<br>G = -2707.4976<br>H = -2707.4576          |            |            |            | SCF E = -2708.7744<br>ZPE = -2708.6962<br>G = -2708.7306<br>H = -2708.6871            |            |            |            |
| 35                                                                                  | -0.0278700 | -0.0002350 | 0.0003090  | 35                                                                                    | 0.0547000  | -0.1218240 | 0.0012250  |
| 7                                                                                   | -3.0385940 | 0.0000230  | -0.0005200 | 7                                                                                     | 3.2198640  | 0.2377060  | -0.0008740 |
| 1                                                                                   | -3.4148400 | -0.6432270 | -0.6858950 | 1                                                                                     | 3.5625220  | 1.1830160  | -0.1149580 |
| 1                                                                                   | -3.4092690 | 0.9172030  | -0.2161760 | 1                                                                                     | 3.6000020  | -0.3144050 | -0.7590660 |
| 1                                                                                   | -3.4144230 | -0.2698890 | 0.9000190  | 1                                                                                     | 3.6099010  | -0.1231350 | 0.8605010  |
| 6                                                                                   | 1.7725660  | 0.0003890  | 0.0000560  | 6                                                                                     | -1.8135150 | -0.3878360 | -0.0019470 |
| 6                                                                                   | 2.9695430  | 0.0002490  | -0.0006910 | 6                                                                                     | -2.6872150 | 0.5995580  | -0.0009500 |
| 1                                                                                   | 4.0314830  | 0.0001570  | -0.0012970 | 1                                                                                     | -3.7463140 | 0.3783500  | -0.0030050 |

|                                                                                     |            |            |            |                                                                                       |            |            |            |
|-------------------------------------------------------------------------------------|------------|------------|------------|---------------------------------------------------------------------------------------|------------|------------|------------|
|                                                                                     |            |            |            | 1                                                                                     | -2.3804850 | 1.6360630  | 0.0019260  |
|                                                                                     |            |            |            | 1                                                                                     | -2.0948020 | -1.4303120 | -0.0047910 |
| <b>H<sub>3</sub>N...Br<sub>2</sub></b>                                              |            |            |            | <b>H<sub>3</sub>N...BrF</b>                                                           |            |            |            |
| 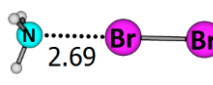   |            |            |            |    |            |            |            |
| SCF E= -5205.0351<br>ZPE=-5204.9979<br>G= -5205.0294<br>H= -5204.9906               |            |            |            | SCF E= -2730.6011<br>ZPE= -2730.5614<br>G= -2730.5890<br>H= -2730.5554                |            |            |            |
| 35                                                                                  | -0.6668270 | -0.0002270 | -0.0011450 | 35                                                                                    | -0.1489780 | -0.0001260 | 0.0001040  |
| 7                                                                                   | -3.3533260 | 0.0002430  | 0.0017600  | 7                                                                                     | 2.1860470  | 0.0000860  | -0.0000780 |
| 1                                                                                   | -3.7108420 | -0.0338700 | -0.9441200 | 1                                                                                     | 2.5331790  | 0.4203110  | 0.8526330  |
| 1                                                                                   | -3.7081520 | 0.8375720  | 0.4451420  | 1                                                                                     | 2.5314140  | 0.5296390  | -0.7903830 |
| 1                                                                                   | -3.7103960 | -0.8014990 | 0.5050930  | 1                                                                                     | 2.5336940  | -0.9484030 | -0.0635250 |
| 35                                                                                  | 1.6554750  | 0.0001150  | 0.0006190  | 9                                                                                     | -1.9651550 | 0.0002520  | -0.0002040 |
| <b>H<sub>3</sub>N...BrCN</b>                                                        |            |            |            | <b>H<sub>3</sub>N...BrOF</b>                                                          |            |            |            |
|  |            |            |            |  |            |            |            |
| SCF E= -2723.6217<br>ZPE=-2723.5768<br>G=-2723.6076<br>H= -2723.5691                |            |            |            | SCF E= -2805.7047<br>ZPE=-2805.6628<br>G= -2805.6949<br>H= -2805.6549                 |            |            |            |
| 35                                                                                  | -0.0241570 | 0.0003050  | 0.0002100  | 35                                                                                    | -0.1806910 | -0.1505890 | 0.0000460  |
| 7                                                                                   | -2.9196020 | -0.0002620 | -0.0001960 | 7                                                                                     | -2.6415960 | 0.2986830  | 0.0004320  |
| 1                                                                                   | -3.2962880 | 0.0462980  | 0.9386470  | 1                                                                                     | -3.1634580 | -0.4963120 | -0.3461160 |
| 1                                                                                   | -3.2918930 | -0.8385380 | -0.4294740 | 1                                                                                     | -2.8367310 | 1.0938150  | -0.5944330 |
| 1                                                                                   | -3.2956110 | 0.7888640  | -0.5116110 | 1                                                                                     | -2.9644320 | 0.5120270  | 0.9354590  |
| 6                                                                                   | 1.7790340  | -0.0004310 | -0.0001090 | 8                                                                                     | 1.6329750  | -0.5337610 | 0.0001560  |
| 7                                                                                   | 2.9274700  | -0.0004140 | -0.0004130 | 9                                                                                     | 2.3017970  | 0.7044860  | -0.0000880 |



**H<sub>3</sub>N...BrC<sub>6</sub>H<sub>5</sub>**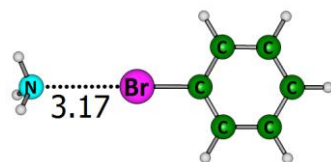

SCF E= -2862.4248  
 ZPE= -2862.2981  
 G= -2862.3364  
 H= -2862.2870

|    |            |            |            |
|----|------------|------------|------------|
| 35 | 1.2081430  | 0.0053190  | -0.0092580 |
| 7  | 4.3794640  | -0.0067780 | 0.0135440  |
| 1  | 4.7907490  | 0.8531630  | -0.3263530 |
| 1  | 4.7620630  | -0.7636810 | -0.5385770 |
| 1  | 4.6967420  | -0.1375260 | 0.9656180  |
| 6  | -0.6870240 | 0.0010520  | -0.0017340 |
| 6  | -1.3684780 | -1.2066710 | 0.0005340  |
| 6  | -1.3739680 | 1.2056920  | 0.0006650  |
| 6  | -2.7562690 | -1.2035390 | 0.0052380  |
| 1  | -0.8173720 | -2.1361690 | -0.0015130 |
| 6  | -2.7617320 | 1.1962370  | 0.0053740  |
| 1  | -0.8270690 | 2.1376730  | -0.0012820 |
| 6  | -3.4558150 | -0.0052310 | 0.0076000  |
| 1  | -3.2900580 | -2.1441520 | 0.0069430  |
| 1  | -3.2997760 | 2.1344190  | 0.0071810  |
| 1  | -4.5368330 | -0.0076880 | 0.0111500  |

**H<sub>3</sub>N...BrC<sub>6</sub>H<sub>4</sub>NH<sub>2</sub>**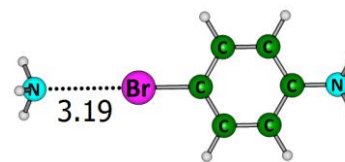

SCF E= -2917.7857  
 ZPE= -2917.6422  
 G= -2917.6819  
 H= -2917.6296

|    |            |            |            |
|----|------------|------------|------------|
| 35 | 1.6386510  | 0.0000240  | 0.0162710  |
| 7  | 4.8255240  | -0.0000480 | -0.0215210 |
| 1  | 5.1575910  | 0.8153510  | -0.5204810 |
| 1  | 5.1575300  | -0.8155010 | -0.5204340 |
| 1  | 5.2698460  | -0.0000410 | 0.8876210  |
| 6  | -0.2569790 | 0.0000080  | 0.0023130  |
| 6  | -0.9512440 | -1.1994910 | -0.0020740 |
| 6  | -0.9512660 | 1.1995020  | -0.0020700 |
| 6  | -2.3361270 | -1.1983530 | -0.0105720 |
| 1  | -0.4103070 | -2.1352380 | 0.0016640  |
| 6  | -2.3361430 | 1.1983430  | -0.0106060 |
| 1  | -0.4103420 | 2.1352560  | 0.0016700  |
| 6  | -3.0492510 | -0.0000130 | -0.0134230 |
| 1  | -2.8729740 | -2.1386910 | -0.0197050 |
| 1  | -2.8730110 | 2.1386680  | -0.0197930 |
| 7  | -4.4418020 | -0.0000050 | -0.0781380 |
| 1  | -4.8855340 | -0.8350150 | 0.2678250  |
| 1  | -4.8855630 | 0.8347780  | 0.2683350  |

**H<sub>3</sub>N...BrC<sub>6</sub>H<sub>4</sub>F**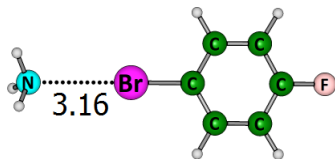

SCF E= -2961.6763  
 ZPE= -2961.557649  
 G= -2961.597064  
 H= -2961.545696

|    |           |            |            |
|----|-----------|------------|------------|
| 35 | 1.6171010 | 0.0042590  | -0.0073990 |
| 7  | 4.7731820 | -0.0067460 | 0.0128460  |

**H<sub>3</sub>N...BrC<sub>6</sub>H<sub>4</sub>Cl**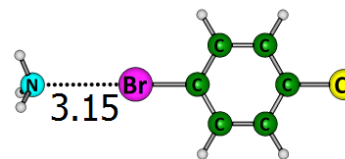

SCF E= -3322.0353  
 ZPE= -3321.9181  
 G= -3321.9584  
 H= -3321.9058

|    |           |            |            |
|----|-----------|------------|------------|
| 35 | 2.0280340 | 0.0033010  | -0.0057410 |
| 7  | 5.1791680 | -0.0060630 | 0.0107170  |

|   |            |            |            |    |            |            |            |
|---|------------|------------|------------|----|------------|------------|------------|
| 1 | 5.1781120  | 0.8544230  | -0.3317230 | 1  | 5.5783940  | 0.8565520  | -0.3369850 |
| 1 | 5.1523430  | -0.7622360 | -0.5436560 | 1  | 5.5574670  | -0.7601280 | -0.5483460 |
| 1 | 5.1024300  | -0.1364490 | 0.9610380  | 1  | 5.5161370  | -0.1342330 | 0.9564290  |
| 6 | -0.2768020 | 0.0015380  | -0.0025470 | 6  | 0.1357050  | 0.0015320  | -0.0022530 |
| 6 | -0.9618470 | -1.2044690 | -0.0010770 | 6  | -0.5509260 | -1.2032650 | -0.0012690 |
| 6 | -0.9653330 | 1.2055630  | -0.0009660 | 6  | -0.5531690 | 1.2050440  | -0.0011960 |
| 6 | -2.3489720 | -1.2099350 | 0.0020940  | 6  | -1.9376240 | -1.2060380 | 0.0007170  |
| 1 | -0.4143690 | -2.1358500 | -0.0024540 | 1  | -0.0057880 | -2.1361520 | -0.0021600 |
| 6 | -2.3524830 | 1.2070180  | 0.0021930  | 6  | -1.9398810 | 1.2052150  | 0.0007860  |
| 1 | -0.4205490 | 2.1385250  | -0.0022650 | 1  | -0.0097810 | 2.1389510  | -0.0020310 |
| 6 | -3.0175780 | -0.0024160 | 0.0036540  | 6  | -2.6200050 | -0.0010380 | 0.0016540  |
| 1 | -2.9111090 | -2.1327090 | 0.0032820  | 1  | -2.4867730 | -2.1364430 | 0.0014290  |
| 1 | -2.9172450 | 2.1281920  | 0.0034550  | 1  | -2.4907440 | 2.1346090  | 0.0015530  |
| 9 | -4.3602600 | -0.0043940 | 0.0068050  | 17 | -4.3587580 | -0.0026440 | 0.0038470  |

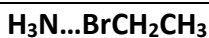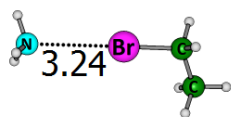

SCF E= -2710.0070  
 ZPE= -2709.9050  
 G= -2709.9412  
 H= -2709.8952

|    |            |            |            |
|----|------------|------------|------------|
| 35 | 0.1223450  | -0.2001130 | 0.0113830  |
| 7  | 3.3142160  | 0.3529030  | -0.0050360 |
| 1  | 3.7989740  | 0.2924050  | 0.8810820  |
| 1  | 3.4781030  | 1.2793930  | -0.3775320 |
| 1  | 3.7507280  | -0.3077960 | -0.6350610 |
| 6  | -1.8078960 | -0.4900780 | -0.0254760 |
| 1  | -2.0058470 | -1.0580990 | -0.9288290 |
| 1  | -2.0322870 | -1.1064730 | 0.8391270  |
| 6  | -2.5602740 | 0.8211160  | -0.0008230 |
| 1  | -2.3026370 | 1.4316480  | -0.8643530 |
| 1  | -3.6348460 | 0.6304200  | -0.0191630 |
| 1  | -2.3247470 | 1.3859150  | 0.8993550  |

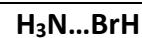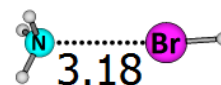

SCF E= -2631.3958  
 ZPE= -2631.3524  
 G= -2631.3807  
 H= -2631.3459

|    |            |            |            |
|----|------------|------------|------------|
| 35 | -0.6835990 | -0.0042790 | 0.0039790  |
| 7  | 2.4919690  | -0.0029380 | 0.0036350  |
| 1  | 2.7493150  | 0.5884470  | -0.7763760 |
| 1  | 2.9293100  | -0.9033820 | -0.1452060 |
| 1  | 2.9058410  | 0.3988480  | 0.8352050  |
| 1  | -2.1022980 | 0.0864110  | -0.0783350 |

**H<sub>3</sub>N...BrOCH<sub>2</sub>Cl**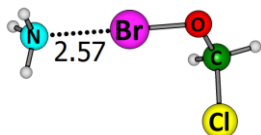

SCF E= -3205.4896  
 ZPE=-3205.4190  
 G= -3205.4541  
 H= -3205.4098

|    |            |            |            |
|----|------------|------------|------------|
| 35 | -0.8437900 | -0.3027600 | -0.0733240 |
| 7  | -3.1178250 | 0.8774760  | 0.1525530  |
| 1  | -2.9780080 | 1.8677840  | -0.0024570 |
| 1  | -3.5366330 | 0.7549700  | 1.0655360  |
| 1  | -3.7684350 | 0.5371300  | -0.5438530 |
| 8  | 0.7821830  | -1.1624170 | -0.2820460 |
| 6  | 1.7825480  | -0.6460390 | 0.4965910  |
| 1  | 1.4812950  | -0.4726670 | 1.5281080  |
| 1  | 2.6273740  | -1.3258240 | 0.4292940  |
| 17 | 2.3870060  | 0.9569670  | -0.1000780 |

**H<sub>3</sub>N...BrCH<sub>2</sub>CH<sub>2</sub>Br**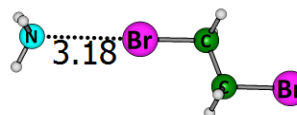

SCF E= -5283.6529  
 ZPE= -5283.5600  
 G= -5283.5987  
 H= -5283.5493

|    |            |            |            |
|----|------------|------------|------------|
| 35 | 1.7303520  | -0.2207640 | 0.0036970  |
| 7  | 4.8249040  | 0.5276140  | -0.0052120 |
| 1  | 5.2368900  | 0.4521370  | 0.9161250  |
| 1  | 5.0401720  | 1.4516460  | -0.3572790 |
| 1  | 5.2971480  | -0.1396700 | -0.6018390 |
| 6  | -0.1587270 | -0.7008390 | -0.0048860 |
| 1  | -0.3371000 | -1.2873220 | -0.8998110 |
| 1  | -0.3405840 | -1.3071730 | 0.8759970  |
| 6  | -0.9807180 | 0.5601450  | 0.0075080  |
| 1  | -0.8114560 | 1.1469090  | 0.9036250  |
| 1  | -0.8071770 | 1.1672720  | -0.8741040 |
| 35 | -2.8793680 | 0.0969660  | -0.0020390 |

**H<sub>3</sub>N...BrOCBr<sub>3</sub>**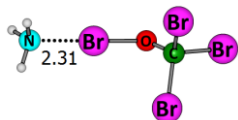

SCF E= -10466.7981  
 ZPE= -10466.7488  
 G= -10466.7902  
 H= -10466.7368

|    |            |            |            |
|----|------------|------------|------------|
| 35 | 2.1419460  | -0.0000440 | -0.6258010 |
| 7  | 4.3873330  | -0.0000280 | -0.0846400 |
| 1  | 4.6018720  | -0.8244920 | 0.4625360  |
| 1  | 4.6021450  | 0.8252960  | 0.4611280  |
| 1  | 4.9540500  | -0.0008410 | -0.9236520 |
| 8  | 0.2893380  | -0.0000810 | -1.1365470 |
| 6  | -0.6132520 | -0.0000100 | -0.1811350 |
| 35 | -2.3670430 | -0.0001120 | -1.0517070 |
| 35 | -0.5089330 | -1.5990410 | 0.9927700  |
| 35 | -0.5089590 | 1.5992240  | 0.9925000  |

**H<sub>3</sub>N...BrC<sub>6</sub>H<sub>4</sub>Br**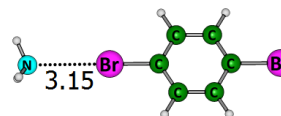

SCF E= -5436.0689  
 ZPE= -5435.9523  
 G= -5435.9397  
 H= -5435.9936

|    |            |            |            |
|----|------------|------------|------------|
| 35 | 2.7272160  | 0.0033420  | -0.0060810 |
| 7  | 5.8768990  | -0.0069990 | 0.0129080  |
| 1  | 6.2770380  | 0.8557410  | -0.3334430 |
| 1  | 6.2559450  | -0.7607290 | -0.5461120 |
| 1  | 6.2123090  | -0.1360320 | 0.9590620  |
| 6  | 0.8351370  | 0.0018970  | -0.0031610 |
| 6  | 0.1484000  | -1.2026830 | -0.0023300 |
| 6  | 0.1465390  | 1.2054180  | -0.0022430 |
| 6  | -1.2387500 | -1.2055160 | -0.0005440 |
| 1  | 0.6931440  | -2.1358680 | -0.0031390 |
| 6  | -1.2406220 | 1.2060950  | -0.0004540 |

|                                                                                     |            |            |            |                                                                                       |            |            |            |
|-------------------------------------------------------------------------------------|------------|------------|------------|---------------------------------------------------------------------------------------|------------|------------|------------|
|                                                                                     |            |            |            | 1                                                                                     | 0.6898390  | 2.1394450  | -0.0029830 |
|                                                                                     |            |            |            | 6                                                                                     | -1.9212300 | -0.0002330 | 0.0003650  |
|                                                                                     |            |            |            | 1                                                                                     | -1.7831450 | -2.1386480 | 0.0000930  |
|                                                                                     |            |            |            | 1                                                                                     | -1.7864540 | 2.1383870  | 0.0002550  |
|                                                                                     |            |            |            | 35                                                                                    | -3.8150390 | -0.0017180 | 0.0028270  |
| <b>H<sub>3</sub>N...BrC<sub>6</sub>H<sub>4</sub>NO<sub>2</sub></b>                  |            |            |            | <b>H<sub>3</sub>N...BrOCl</b>                                                         |            |            |            |
| 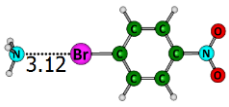   |            |            |            |    |            |            |            |
| SCF E= -3066.9383<br>ZPE= -3066.8083<br>G= -3066.8503<br>H= -3066.7948              |            |            |            | SCF E= -3166.1230<br>ZPE= -3166.0818<br>G= -3166.1146<br>H= -3166.0739                |            |            |            |
| 35                                                                                  | 2.2896390  | 0.0019090  | -0.0019910 | 35                                                                                    | -0.5485740 | -0.1919180 | 0.0006780  |
| 7                                                                                   | 5.4097960  | -0.0038030 | 0.0038080  | 7                                                                                     | -2.9248310 | 0.4683030  | -0.0005480 |
| 1                                                                                   | 5.7947870  | 0.8591860  | -0.3591180 | 1                                                                                     | -3.0611900 | 1.2896550  | -0.5756750 |
| 1                                                                                   | 5.7836640  | -0.7585870 | -0.5575180 | 1                                                                                     | -3.2367540 | 0.6758880  | 0.9393910  |
| 1                                                                                   | 5.7700990  | -0.1215910 | 0.9423900  | 1                                                                                     | -3.4913540 | -0.2837150 | -0.3712780 |
| 6                                                                                   | 0.4022230  | 0.0009890  | -0.0008180 | 8                                                                                     | 1.2263380  | -0.7853200 | -0.0014250 |
| 6                                                                                   | -0.2811180 | -1.2085980 | -0.0004860 | 17                                                                                    | 2.3325000  | 0.4729250  | -0.0000550 |
| 6                                                                                   | -0.2823920 | 1.2098710  | -0.0005070 |                                                                                       |            |            |            |
| 6                                                                                   | -1.6653140 | -1.2119750 | 0.0001490  |                                                                                       |            |            |            |
| 1                                                                                   | 0.2681610  | -2.1385120 | -0.0007190 |                                                                                       |            |            |            |
| 6                                                                                   | -1.6665830 | 1.2117820  | 0.0000800  |                                                                                       |            |            |            |
| 1                                                                                   | 0.2659170  | 2.1403570  | -0.0008040 |                                                                                       |            |            |            |
| 6                                                                                   | -2.3323390 | -0.0004450 | 0.0003730  |                                                                                       |            |            |            |
| 1                                                                                   | -2.2281190 | -2.1327380 | 0.0003690  |                                                                                       |            |            |            |
| 1                                                                                   | -2.2303740 | 2.1319500  | 0.0002970  |                                                                                       |            |            |            |
| 7                                                                                   | -3.8051680 | -0.0011370 | 0.0009360  |                                                                                       |            |            |            |
| 8                                                                                   | -4.3655050 | 1.0723860  | 0.0012640  |                                                                                       |            |            |            |
| 8                                                                                   | -4.3645900 | -1.0751420 | 0.0010910  |                                                                                       |            |            |            |
| <b>H<sub>3</sub>N...BrOBr</b>                                                       |            |            |            | <b>H<sub>3</sub>N...BrOCHCl<sub>2</sub></b>                                           |            |            |            |
|  |            |            |            |  |            |            |            |
| SCF E= -5280.1693<br>ZPE= -5280.1287<br>G= -5280.1627<br>H= -5280.1205              |            |            |            | SCF E= -3665.0989<br>ZPE= -3665.0379<br>G= -3665.0746<br>H= -3665.0278                |            |            |            |

|                                                                                                                                                                                                             |            |            |            |                                                                                                                                                                                                              |            |            |            |
|-------------------------------------------------------------------------------------------------------------------------------------------------------------------------------------------------------------|------------|------------|------------|--------------------------------------------------------------------------------------------------------------------------------------------------------------------------------------------------------------|------------|------------|------------|
| 35                                                                                                                                                                                                          | 1.0925820  | 0.2316110  | -0.0001340 | 35                                                                                                                                                                                                           | -1.1759280 | 0.0017330  | 0.3150690  |
| 7                                                                                                                                                                                                           | 3.4279740  | -0.6088360 | 0.0001370  | 7                                                                                                                                                                                                            | -3.3277190 | -0.0019280 | -0.8384980 |
| 1                                                                                                                                                                                                           | 3.5979880  | -1.1779930 | -0.8189910 | 1                                                                                                                                                                                                            | -4.0309670 | -0.4748330 | -0.2855120 |
| 1                                                                                                                                                                                                           | 3.5998160  | -1.1690860 | 0.8250070  | 1                                                                                                                                                                                                            | -3.2326570 | -0.4828360 | -1.7238540 |
| 1                                                                                                                                                                                                           | 4.0787340  | 0.1660410  | -0.0047980 | 1                                                                                                                                                                                                            | -3.6355990 | 0.9456130  | -1.0157510 |
| 8                                                                                                                                                                                                           | -0.6214420 | 0.9597540  | 0.0002930  | 8                                                                                                                                                                                                            | 0.4425910  | 0.0018910  | 1.2671830  |
| 35                                                                                                                                                                                                          | -1.9583200 | -0.2669010 | 0.0000050  | 6                                                                                                                                                                                                            | 1.5720730  | -0.0000520 | 0.5448590  |
| <b>H<sub>3</sub>N...BrOCHF<sub>2</sub></b><br>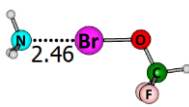<br>SCF E= -2944.4055<br>ZPE= -2944.3407<br>G= -2944.3756<br>H= -2944.3314   |            |            |            | <b>H<sub>3</sub>N...BrOCCIF<sub>2</sub></b><br><br>SCF E= -3404.0125<br>ZPE= -3403.9577<br>G= -3403.9946<br>H= -3403.9475 |            |            |            |
| 35                                                                                                                                                                                                          | -0.7449420 | -0.2833090 | -0.0001750 | 35                                                                                                                                                                                                           | 1.3507640  | -0.2613260 | 0.0000990  |
| 7                                                                                                                                                                                                           | -3.0291880 | 0.6285030  | 0.0005480  | 7                                                                                                                                                                                                            | 3.6415390  | 0.2821360  | -0.0001680 |
| 1                                                                                                                                                                                                           | -3.1572660 | 1.2090550  | -0.8183130 | 1                                                                                                                                                                                                            | 3.8699260  | 0.8233140  | 0.8242590  |
| 1                                                                                                                                                                                                           | -3.1617310 | 1.1997060  | 0.8252500  | 1                                                                                                                                                                                                            | 3.8678730  | 0.8254130  | -0.8237820 |
| 1                                                                                                                                                                                                           | -3.7322670 | -0.0992040 | -0.0055120 | 1                                                                                                                                                                                                            | 4.1960240  | -0.5647960 | -0.0019500 |
| 8                                                                                                                                                                                                           | 0.9831260  | -1.0178800 | -0.0012880 | 8                                                                                                                                                                                                            | -0.4852360 | -0.7870580 | -0.0001570 |
| 6                                                                                                                                                                                                           | 1.9758360  | -0.1158270 | -0.0002760 | 6                                                                                                                                                                                                            | -1.3431650 | 0.2227990  | 0.0000190  |
| 1                                                                                                                                                                                                           | 2.9286410  | -0.6456190 | -0.0010740 | 9                                                                                                                                                                                                            | -1.2107300 | 1.0259620  | 1.0728310  |
| 9                                                                                                                                                                                                           | 1.9265670  | 0.7063860  | -1.0791900 | 9                                                                                                                                                                                                            | -1.2106740 | 1.0263510  | -1.0725000 |
| 9                                                                                                                                                                                                           | 1.9267530  | 0.7036540  | 1.0807360  | 17                                                                                                                                                                                                           | -2.9981080 | -0.4366840 | -0.0001560 |
| <b>H<sub>3</sub>N...BrOCCl<sub>3</sub></b><br><br>SCF E= -4124.6982<br>ZPE= -4124.6474<br>G= -4124.6864<br>H= -4124.6362 |            |            |            | <b>H<sub>3</sub>N...BrOCF<sub>3</sub></b><br><br>SCF E= -3043.6731<br>ZPE= -3043.6162<br>G= -3043.6524<br>H= -3043.6065 |            |            |            |

|    |            |            |            |    |            |            |            |
|----|------------|------------|------------|----|------------|------------|------------|
| 35 | -1.5755960 | 0.0001080  | -0.3749020 | 35 | 1.0469760  | -0.2619560 | -0.0000110 |
| 7  | -3.8050680 | -0.0001550 | 0.3134130  | 7  | 3.2832760  | 0.4663210  | 0.0000470  |
| 1  | -3.9864440 | 0.8272340  | 0.8678830  | 1  | 3.7388990  | 0.2079970  | 0.8662880  |
| 1  | -3.9825450 | -0.8211820 | 0.8785020  | 1  | 3.3042280  | 1.4741710  | -0.0928220 |
| 1  | -4.4286860 | -0.0068150 | -0.4840530 | 1  | 3.7914020  | 0.0561100  | -0.7734590 |
| 8  | 0.2303520  | 0.0002440  | -0.9928770 | 8  | -0.7414730 | -0.8964920 | 0.0002280  |
| 6  | 1.1850610  | 0.0000090  | -0.0734540 | 6  | -1.6642620 | 0.0590320  | 0.0000100  |
| 17 | 1.1334340  | 1.4544520  | 0.9982810  | 9  | -1.5952380 | 0.8636460  | 1.0735920  |
| 17 | 1.1335050  | -1.4548540 | 0.9977390  | 9  | -1.5950650 | 0.8633030  | -1.0738200 |
| 17 | 2.7463460  | 0.0001710  | -0.9343090 | 9  | -2.8701720 | -0.5065390 | 0.0000240  |

### H<sub>3</sub>N...BrCH<sub>3</sub>

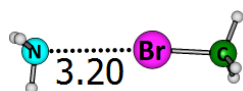

SCF E= -2670.6974  
 ZPE= -2670.6244  
 G= -2670.6581  
 H= -2670.6158

|    |            |            |            |
|----|------------|------------|------------|
| 7  | 2.9306390  | 0.0166690  | 0.0007490  |
| 1  | 3.4679410  | -0.4349110 | -0.7280730 |
| 1  | 3.3587740  | -0.2230390 | 0.8858240  |
| 1  | 3.0324610  | 1.0160020  | -0.1231410 |
| 6  | -2.2076100 | 0.0683040  | 0.0053460  |
| 1  | -2.5169700 | 0.5626830  | 0.9186440  |
| 1  | -2.5207790 | 0.6346630  | -0.8637190 |
| 1  | -2.5973980 | -0.9417210 | -0.0339800 |
| 35 | -0.2712240 | -0.0325770 | -0.0026530 |

### H<sub>3</sub>N...BrCNBeCl<sub>2</sub>

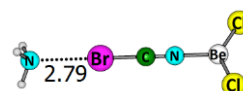

SCF E= -3658.9698  
 ZPE= -3658.9176  
 G= -3658.9056  
 H= -3658.9584

|    |            |            |            |
|----|------------|------------|------------|
| 6  | 0.3278990  | -0.0019850 | -0.0000220 |
| 7  | -0.8142850 | -0.0014990 | 0.0000000  |
| 4  | -2.5319500 | 0.0005360  | -0.0000260 |
| 17 | -3.2514970 | 1.7226980  | -0.0000290 |
| 17 | -3.2559600 | -1.7197010 | -0.0000250 |
| 35 | 2.1213450  | -0.0019160 | 0.0001040  |
| 7  | 4.9109190  | 0.0031050  | -0.0000940 |
| 1  | 5.2839380  | 0.9383220  | 0.1134660  |
| 1  | 5.2914700  | -0.5605320 | 0.7509250  |
| 1  | 5.2882540  | -0.3631540 | -0.8662250 |

### H<sub>3</sub>N...BrC<sub>3</sub>N

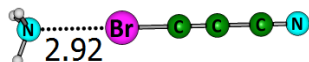

SCF E= -2799.7699  
 ZPE= -2799.7147  
 G= -2799.7490  
 H= -2799.7049

|   |           |            |           |
|---|-----------|------------|-----------|
| 7 | 3.8266230 | -0.0052210 | 0.0002180 |
| 1 | 4.2033130 | -0.1604100 | 0.9273460 |

### H<sub>3</sub>N...BrC<sub>5</sub>N

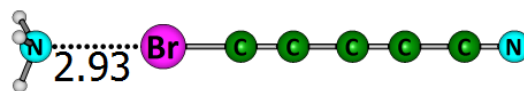

SCF E= -2875.9232  
 ZPE= -2875.8578  
 G= -2875.8955  
 H= -2875.8459

|   |            |           |            |
|---|------------|-----------|------------|
| 6 | -1.0913670 | 0.0004990 | -0.0006040 |
| 6 | 0.1137210  | 0.0002290 | -0.0006780 |

|    |            |            |            |    |            |            |            |
|----|------------|------------|------------|----|------------|------------|------------|
| 1  | 4.2043080  | 0.8741840  | -0.3307360 | 7  | 4.8343940  | 0.0006870  | 0.0011610  |
| 1  | 4.1992450  | -0.7328490 | -0.5975190 | 1  | 5.2115030  | -0.2395090 | 0.9098260  |
| 6  | -0.8879620 | 0.0010030  | 0.0003730  | 1  | 5.2031480  | 0.9119790  | -0.2421940 |
| 6  | -2.0892590 | -0.0003040 | 0.0002940  | 1  | 5.2158120  | -0.6615460 | -0.6632620 |
| 6  | -3.4652410 | -0.0019270 | 0.0000050  | 6  | -2.4549600 | 0.0006510  | -0.0003230 |
| 7  | -4.6152150 | -0.0031290 | -0.0001520 | 6  | -3.6602700 | 0.0006110  | 0.0000040  |
| 35 | 0.9019440  | 0.0024260  | -0.0001030 | 6  | -5.0332750 | 0.0001050  | 0.0004410  |
|    |            |            |            | 7  | -6.1839520 | -0.0002370 | 0.0008050  |
|    |            |            |            | 35 | 1.9020960  | -0.0007610 | -0.0003190 |

### H<sub>3</sub>N...BrNO<sub>2</sub>BeCl<sub>2</sub>

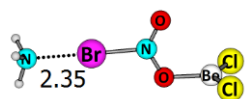

SCF E= -3771.2206  
 ZPE= -3771.1639  
 G= -3771.2057  
 H= -3771.1514

|    |            |            |            |
|----|------------|------------|------------|
| 7  | 0.1229530  | -0.0022640 | 0.4367240  |
| 8  | -0.2485630 | -0.0035100 | 1.5589390  |
| 8  | -0.6272410 | -0.0007090 | -0.5481730 |
| 7  | 4.3594770  | 0.0027360  | -0.4561670 |
| 1  | 4.7747550  | 0.8736100  | -0.1468590 |
| 1  | 4.8138860  | -0.7649130 | 0.0241700  |
| 1  | 4.5124190  | -0.0974960 | -1.4526560 |
| 4  | -2.2967730 | 0.0008930  | -0.2636230 |
| 17 | -2.9864320 | -1.7286860 | -0.1736560 |
| 17 | -2.9821570 | 1.7320790  | -0.1711730 |
| 35 | 2.0623280  | -0.0012000 | 0.0154830  |

### H<sub>3</sub>N...ClCF<sub>3</sub>

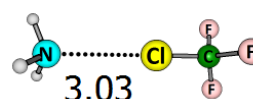

SCF E= -854.4331  
 ZPE= -854.3818  
 G= -854.4180  
 H= -854.3721

|    |            |            |            |
|----|------------|------------|------------|
| 7  | -3.6848880 | 0.0020340  | 0.0024770  |
| 1  | -4.0665430 | 0.4934390  | -0.7960320 |
| 1  | -4.0408850 | 0.4588440  | 0.8326790  |
| 1  | -4.0693630 | -0.9343850 | -0.0113540 |
| 6  | 1.1014990  | 0.0006380  | 0.0010650  |
| 9  | 1.5716090  | -1.1426400 | 0.4795300  |
| 9  | 1.5783250  | 0.1633310  | -1.2251830 |
| 9  | 1.5625260  | 0.9870150  | 0.7577790  |
| 17 | -0.6500080 | -0.0061950 | -0.0093030 |

### H<sub>3</sub>N...ClCCH

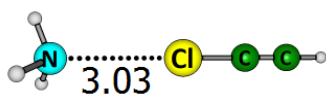

SCF E= -593.4838  
 ZPE= -593.4282  
 G= -593.4593  
 H= -593.4199

|   |            |            |            |
|---|------------|------------|------------|
| 7 | -3.0167920 | -0.0008200 | -0.0006020 |
|---|------------|------------|------------|

### H<sub>3</sub>N...ClCHCH<sub>2</sub>

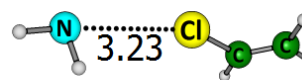

SCF E= -594.7396  
 ZPE= -594.6606  
 G= -594.6942  
 H= -594.6518

|    |            |            |           |
|----|------------|------------|-----------|
| 17 | -0.0241960 | -0.1178710 | 0.1785950 |
|----|------------|------------|-----------|

|                                                                                     |            |            |            |                                                                                       |            |            |            |
|-------------------------------------------------------------------------------------|------------|------------|------------|---------------------------------------------------------------------------------------|------------|------------|------------|
| 1                                                                                   | -3.3935150 | 0.9282860  | -0.1405900 | 7                                                                                     | -3.2432070 | -0.0786060 | -0.0810400 |
| 1                                                                                   | -3.3881330 | -0.3450040 | 0.8759140  | 1                                                                                     | -4.2401370 | 0.0167300  | -0.2271160 |
| 1                                                                                   | -3.3906680 | -0.5888330 | -0.7348110 | 1                                                                                     | -2.7994010 | -0.0456440 | -0.9903320 |
| 6                                                                                   | 1.6597650  | -0.0001180 | 0.0000270  | 1                                                                                     | -2.9320210 | 0.7400630  | 0.4267050  |
| 6                                                                                   | 2.8554810  | -0.0013230 | -0.0005590 | 6                                                                                     | 1.5763450  | 0.5047760  | -0.0533100 |
| 1                                                                                   | 3.9168780  | -0.0023310 | -0.0011300 | 6                                                                                     | 2.6397480  | -0.2675830 | -0.1459950 |
| 17                                                                                  | 0.0165590  | 0.0013100  | 0.0004720  | 1                                                                                     | 3.6125180  | 0.1814610  | -0.2890650 |
| <b>H<sub>3</sub>N...Cl<sub>2</sub></b>                                              |            |            |            | <b>H<sub>3</sub>N...ClCN</b>                                                          |            |            |            |
| 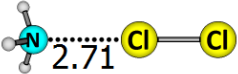   |            |            |            |    |            |            |            |
| SCF E= -976.9366<br>ZPE= -976.8990<br>G= -976.9286<br>H= -976.8918                  |            |            |            | SCF E= -609.5832<br>ZPE= -609.5381<br>G= -609.5687<br>H= -609.5302                    |            |            |            |
| 7                                                                                   | -2.8517590 | 0.0001920  | 0.0001230  | 7                                                                                     | -2.8874880 | -0.0011910 | -0.0012170 |
| 1                                                                                   | -3.2165830 | 0.5339390  | -0.7782300 | 1                                                                                     | -3.2666960 | -0.2108290 | 0.9139920  |
| 1                                                                                   | -3.2115080 | 0.4091250  | 0.8528200  | 1                                                                                     | -3.2610020 | -0.6915920 | -0.6410260 |
| 1                                                                                   | -3.2158140 | -0.9412080 | -0.0707730 | 1                                                                                     | -3.2660660 | 0.8957810  | -0.2799020 |
| 17                                                                                  | -0.1397980 | -0.0004210 | -0.0005610 | 6                                                                                     | 1.6614790  | -0.0004760 | -0.0002390 |
| 17                                                                                  | 1.8813400  | 0.0002330  | 0.0002850  | 7                                                                                     | 2.8096230  | -0.0019490 | -0.0021220 |
| <b>H<sub>3</sub>N...ClOCH<sub>3</sub></b>                                           |            |            |            | <b>H<sub>3</sub>N...ClOF</b>                                                          |            |            |            |
|  |            |            |            |  |            |            |            |
| SCF E= -631.8231<br>ZPE= -631.7442<br>G= -631.7765<br>H= -631.7354                  |            |            |            | SCF E= -691.6532<br>ZPE= -691.6114<br>G= -691.6430<br>H= -691.6034                    |            |            |            |
| 7                                                                                   | -2.8865760 | 0.2420210  | 0.0000040  | 7                                                                                     | -2.7247830 | -0.2247290 | -0.0002360 |
| 1                                                                                   | -3.2047830 | 0.7494720  | -0.8154550 | 1                                                                                     | -3.0126470 | -0.6019830 | 0.8936260  |
| 1                                                                                   | -3.2046700 | 0.7434900  | 0.8191920  | 1                                                                                     | -2.9470010 | -0.9086700 | -0.7123520 |
| 1                                                                                   | -3.3423050 | -0.6613780 | -0.0032670 | 1                                                                                     | -3.2779260 | 0.6030530  | -0.1813920 |
| 8                                                                                   | 1.4855510  | -0.5930930 | 0.0000740  | 8                                                                                     | 1.4851150  | 0.5714100  | -0.0003870 |
| 6                                                                                   | 2.2498350  | 0.5974200  | 0.0000030  | 9                                                                                     | 2.1434420  | -0.6700960 | -0.0000390 |
| 1                                                                                   | 2.0475640  | 1.1931370  | 0.8921380  | 17                                                                                    | -0.1682850 | 0.2317820  | 0.0003070  |
| 1                                                                                   | 3.2892750  | 0.2727680  | 0.0000570  |                                                                                       |            |            |            |



|                                                                                     |            |            |            |                                                                                       |            |            |            |
|-------------------------------------------------------------------------------------|------------|------------|------------|---------------------------------------------------------------------------------------|------------|------------|------------|
| 1                                                                                   | 2.0476150  | 1.1930040  | -0.8922330 |                                                                                       |            |            |            |
| 17                                                                                  | -0.1652990 | -0.2367300 | -0.0000630 |                                                                                       |            |            |            |
| <b>H<sub>3</sub>N...ClC<sub>6</sub>H<sub>5</sub></b>                                |            |            |            | <b>H<sub>3</sub>N...ClC<sub>6</sub>H<sub>4</sub>F</b>                                 |            |            |            |
| 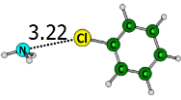   |            |            |            |    |            |            |            |
| SCF E= -748.3901<br>ZPE= -748.2627<br>G= -748.3008<br>H= -748.2519                  |            |            |            | SCF E= -847.6410<br>ZPE= -847.5220<br>G= -847.5612<br>H= -847.5101                    |            |            |            |
| 7                                                                                   | -4.5533860 | 0.2595820  | 0.0999550  | 7                                                                                     | -5.0683140 | 0.0294860  | 0.0182090  |
| 1                                                                                   | -5.5172370 | 0.5537260  | 0.1930740  | 1                                                                                     | -5.6148550 | -0.7146060 | -0.3962530 |
| 1                                                                                   | -4.1399550 | 0.8084040  | -0.6434190 | 1                                                                                     | -5.3475590 | 0.8927380  | -0.4301910 |
| 1                                                                                   | -4.0747760 | 0.5143700  | 0.9548470  | 1                                                                                     | -5.3398140 | 0.0954900  | 0.9909640  |
| 6                                                                                   | 0.2897790  | -0.1504130 | -0.0400330 | 6                                                                                     | -0.1588220 | -0.0196580 | -0.0101330 |
| 6                                                                                   | 0.7505100  | 1.1562290  | -0.0475120 | 6                                                                                     | 0.5105050  | 1.1945630  | -0.0064370 |
| 6                                                                                   | 1.1663430  | -1.2219010 | 0.0184410  | 6                                                                                     | 0.5421240  | -1.2160010 | -0.0054730 |
| 6                                                                                   | 2.1170960  | 1.3896300  | 0.0051420  | 6                                                                                     | 1.8969950  | 1.2159450  | 0.0021530  |
| 1                                                                                   | 0.0457820  | 1.9739150  | -0.0945680 | 1                                                                                     | -0.0528140 | 2.1163570  | -0.0103680 |
| 6                                                                                   | 2.5304260  | -0.9741550 | 0.0704500  | 6                                                                                     | 1.9287570  | -1.2009810 | 0.0031400  |
| 1                                                                                   | 0.7804500  | -2.2310760 | 0.0230560  | 1                                                                                     | 0.0029490  | -2.1521160 | -0.0087500 |
| 6                                                                                   | 3.0090900  | 0.3283450  | 0.0641240  | 6                                                                                     | 2.5797390  | 0.0161920  | 0.0068350  |
| 1                                                                                   | 2.4829410  | 2.4071950  | -0.0005010 | 1                                                                                     | 2.4485320  | 2.1449980  | 0.0051900  |
| 1                                                                                   | 3.2197390  | -1.8060990 | 0.1161600  | 1                                                                                     | 2.5042440  | -2.1154270 | 0.0068680  |
| 1                                                                                   | 4.0728920  | 0.5153940  | 0.1048030  | 9                                                                                     | 3.9224550  | 0.0340270  | 0.0155790  |
| 17                                                                                  | -1.4220940 | -0.4540770 | -0.1045180 | 17                                                                                    | -1.8953160 | -0.0423790 | -0.0215090 |
| <b>H<sub>3</sub>N...ClC<sub>6</sub>H<sub>4</sub>Cl</b>                              |            |            |            | <b>H<sub>3</sub>N...ClCH<sub>2</sub>CH<sub>3</sub></b>                                |            |            |            |
|  |            |            |            |  |            |            |            |
| SCF E= -1208.0000<br>ZPE= -1207.8827<br>G= -1207.9238<br>H= -1207.8703              |            |            |            | SCF E= -595.9705<br>ZPE= -595.8679<br>G= -595.9040<br>H= -595.8582                    |            |            |            |
| 7                                                                                   | 5.5199960  | -0.0034820 | -0.0004570 | 7                                                                                     | 3.4519360  | 0.2536530  | 0.0006120  |
| 1                                                                                   | 5.8992870  | 0.8591680  | -0.3696940 | 1                                                                                     | 3.8646210  | 0.1466530  | 0.9183150  |

|    |            |            |            |    |            |            |            |
|----|------------|------------|------------|----|------------|------------|------------|
| 1  | 5.8870620  | -0.7586830 | -0.5654100 | 1  | 3.6664380  | 1.1891890  | -0.3195820 |
| 1  | 5.8923840  | -0.1194770 | 0.9334530  | 1  | 3.9231670  | -0.3926090 | -0.6191380 |
| 6  | 0.6177180  | 0.0018120  | 0.0002210  | 6  | -1.7091970 | -0.5517230 | -0.0022080 |
| 6  | -0.0674860 | -1.2033250 | 0.0001530  | 1  | -1.9344880 | -1.1389090 | -0.8879320 |
| 6  | -0.0695890 | 1.2057590  | 0.0001500  | 1  | -1.9380930 | -1.1436910 | 0.8793860  |
| 6  | -1.4537000 | -1.2057490 | 0.0000060  | 6  | -2.4482630 | 0.7671870  | -0.0000740 |
| 1  | 0.4828220  | -2.1330820 | 0.0002300  | 1  | -2.1912280 | 1.3529840  | -0.8808050 |
| 6  | -1.4558020 | 1.2057390  | 0.0000190  | 1  | -3.5243860 | 0.5881760  | -0.0024920 |
| 1  | 0.4791000  | 2.1364700  | 0.0002360  | 1  | -2.1944070 | 1.3482830  | 0.8846810  |
| 6  | -2.1361200 | -0.0006000 | -0.0000560 | 17 | 0.0652690  | -0.2952020 | 0.0021750  |
| 1  | -2.0030520 | -2.1359540 | -0.0000420 |    |            |            |            |
| 1  | -2.0067930 | 2.1349760  | -0.0000150 |    |            |            |            |
| 17 | -3.8749430 | -0.0020850 | -0.0002070 |    |            |            |            |
| 17 | 2.3525360  | 0.0032110  | 0.0002940  |    |            |            |            |

### H<sub>3</sub>N...ClH

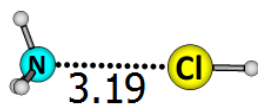

SCF E= -517.3618  
 ZPE=-517.3177  
 G= -517.3454  
 H= -517.3112

|    |            |            |            |
|----|------------|------------|------------|
| 7  | -2.0541820 | -0.0000160 | 0.0000790  |
| 1  | -2.4278400 | -0.5535890 | 0.7604600  |
| 1  | -2.4262120 | -0.3820850 | -0.8600770 |
| 1  | -2.4269360 | 0.9357370  | 0.0987020  |
| 17 | 1.1322080  | 0.0000200  | 0.0000290  |
| 1  | 2.4127240  | -0.0002850 | -0.0001370 |

### H<sub>3</sub>N...ClOCCl<sub>2</sub>

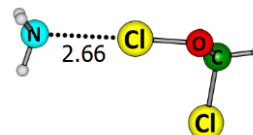

SCF E= -1091.4375  
 ZPE= -1091.3671  
 G= -1091.4023  
 H= -1091.3577

|    |            |            |            |
|----|------------|------------|------------|
| 7  | -3.3431150 | 0.7163320  | 0.1226910  |
| 1  | -3.2371840 | 1.6228590  | -0.3146430 |
| 1  | -3.6345890 | 0.8666390  | 1.0798560  |
| 1  | -4.0884750 | 0.2268830  | -0.3556230 |
| 8  | 0.5268380  | -1.2347600 | -0.3071440 |
| 6  | 1.4939060  | -0.6637350 | 0.4905330  |
| 1  | 1.1556900  | -0.5140860 | 1.5131440  |
| 1  | 2.3595690  | -1.3165510 | 0.4347780  |
| 17 | 2.0256520  | 0.9530610  | -0.1016570 |
| 17 | -0.9863190 | -0.4848010 | -0.1161310 |

### H<sub>3</sub>N...ClOCBr<sub>3</sub>

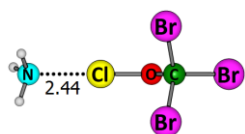

### H<sub>3</sub>N...ClCCl<sub>3</sub>

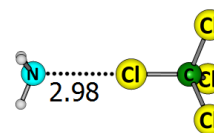

|                                                                        |            |            |            |                                                                        |            |            |            |
|------------------------------------------------------------------------|------------|------------|------------|------------------------------------------------------------------------|------------|------------|------------|
| SCF E= -8352.7411<br>ZPE= -8352.6923<br>G= -8352.7337<br>H= -8352.6801 |            |            |            | SCF E= -1935.4624<br>ZPE= -1935.4168<br>G= -1935.4552<br>H= -1935.4058 |            |            |            |
| 7                                                                      | -4.5438370 | 0.0012070  | 0.5257300  | 7                                                                      | 4.1721520  | 0.0002490  | -0.0000950 |
| 1                                                                      | -4.7549030 | -0.6790440 | -0.1929640 | 1                                                                      | 4.5460110  | 0.3527060  | 0.8720000  |
| 1                                                                      | -4.8332640 | 0.9137890  | 0.1984400  | 1                                                                      | 4.5480540  | 0.5764200  | -0.7425750 |
| 1                                                                      | -5.0787290 | -0.2288580 | 1.3531460  | 1                                                                      | 4.5403530  | -0.9338010 | -0.1290920 |
| 8                                                                      | -0.4389740 | -0.0001110 | 1.2830240  | 6                                                                      | -0.5695920 | -0.0000220 | -0.0000520 |
| 6                                                                      | 0.3625620  | -0.0000400 | 0.2025240  | 17                                                                     | -1.1717610 | 1.6173360  | -0.4074500 |
| 35                                                                     | 2.1684940  | 0.0041760  | 0.9185260  | 17                                                                     | -1.1690200 | -0.4553960 | 1.6048900  |
| 35                                                                     | 0.1204290  | -1.5961190 | -0.9227680 | 17                                                                     | -1.1718700 | -1.1625080 | -1.1955530 |
| 35                                                                     | 0.1153680  | 1.5921710  | -0.9272120 | 17                                                                     | 1.1937130  | 0.0007480  | -0.0018500 |
| 17                                                                     | -2.1376470 | -0.0012470 | 0.9460470  |                                                                        |            |            |            |

**H<sub>3</sub>N...ClC<sub>6</sub>H<sub>4</sub>Br**

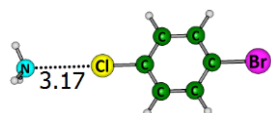

SCF E= -3322.0337  
 ZPE= -3321.917  
 G= -3321.9589  
 H= -3321.9042

|    |            |            |            |
|----|------------|------------|------------|
| 7  | 6.2553100  | -0.0046220 | -0.0006030 |
| 1  | 6.6351260  | 0.8582620  | -0.3687790 |
| 1  | 6.6219450  | -0.7592970 | -0.5665520 |
| 1  | 6.6278280  | -0.1220160 | 0.9330880  |
| 6  | 1.3551720  | 0.0022840  | 0.0002840  |
| 6  | 0.6699780  | -1.2027210 | 0.0002360  |
| 6  | 0.6680410  | 1.2061940  | 0.0002350  |
| 6  | -0.7166620 | -1.2053210 | 0.0001080  |
| 1  | 1.2199920  | -2.1327200 | 0.0003040  |
| 6  | -0.7186030 | 1.2065420  | 0.0001170  |
| 1  | 1.2165620  | 2.1370720  | 0.0003100  |
| 6  | -1.3993050 | 0.0000610  | 0.0000350  |
| 1  | -1.2611780 | -2.1383040 | 0.0000550  |
| 1  | -1.2646400 | 2.1386360  | 0.0000810  |
| 35 | -3.2931080 | -0.0014740 | -0.0001710 |
| 17 | 3.0896620  | 0.0035340  | 0.0003310  |

**H<sub>3</sub>N...ClC<sub>6</sub>H<sub>4</sub>NO<sub>2</sub>**

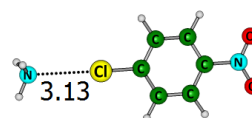

SCF E= -952.9032  
 ZPE= -952.7728  
 G= -952.8143  
 H= -952.7595

|    |            |            |            |
|----|------------|------------|------------|
| 7  | -5.7673110 | -0.0185840 | -0.0000160 |
| 1  | -6.2013870 | 0.8957960  | -0.0003090 |
| 1  | -6.1111390 | -0.5114450 | 0.8145100  |
| 1  | -6.1108700 | -0.5117830 | -0.8144550 |
| 6  | -0.9046460 | 0.0106500  | 0.0000230  |
| 6  | -0.2277800 | -1.2022150 | 0.0000700  |
| 6  | -0.2168600 | 1.2173830  | -0.0000570 |
| 6  | 1.1557500  | -1.2107660 | 0.0000360  |
| 1  | -0.7860380 | -2.1266800 | 0.0001230  |
| 6  | 1.1667080  | 1.2133430  | -0.0000480 |
| 1  | -0.7667870 | 2.1468200  | -0.0001040 |
| 6  | 1.8277040  | -0.0017160 | -0.0000030 |
| 1  | 1.7150590  | -2.1335950 | 0.0000530  |
| 1  | 1.7343650  | 2.1310800  | -0.0000930 |
| 7  | 3.3001970  | -0.0082840 | -0.0000070 |
| 8  | 3.8647840  | 1.0630260  | 0.0001300  |
| 8  | 3.8553160  | -1.0845380 | -0.0001430 |
| 17 | -2.6334970 | 0.0182290  | 0.0000240  |

**H<sub>3</sub>N...ClOCl**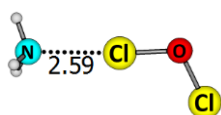

SCF E= -1052.0701  
 ZPE= -1052.0292  
 G= -1052.0618  
 H= -1052.0210

|    |            |            |            |
|----|------------|------------|------------|
| 7  | -3.1400380 | -0.3682140 | 0.0001960  |
| 1  | -3.4630650 | -0.5757770 | 0.9362660  |
| 1  | -3.2991590 | -1.1852220 | -0.5750210 |
| 1  | -3.7041060 | 0.3875680  | -0.3661540 |
| 8  | 0.9889250  | 0.8297370  | -0.0002940 |
| 17 | 2.0748070  | -0.4526020 | -0.0000140 |
| 17 | -0.6315600 | 0.2945450  | 0.0003610  |

**H<sub>3</sub>N...ClOBr**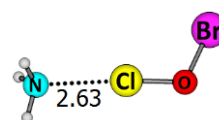

SCF E= -3166.1166  
 ZPE= -3166.0761  
 G= -3166.1098  
 H= -3166.0678

|    |            |            |            |
|----|------------|------------|------------|
| 7  | 3.7461500  | -0.4776470 | 0.0004950  |
| 1  | 3.9345450  | -1.1557990 | -0.7263210 |
| 1  | 3.9981140  | -0.8917540 | 0.8885320  |
| 1  | 4.3484040  | 0.3206760  | -0.1536960 |
| 8  | -0.3169530 | 1.0066730  | 0.0016500  |
| 35 | -1.6338690 | -0.2529980 | 0.0000370  |
| 17 | 1.2480540  | 0.3454090  | -0.0015580 |

**H<sub>3</sub>N...ClOCHCl<sub>2</sub>**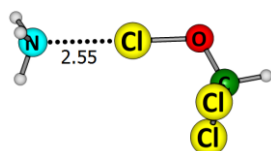

SCF E= -1551.0444  
 ZPE= -1550.9835  
 G= -1551.0207  
 H= -1550.9732

|    |            |            |            |
|----|------------|------------|------------|
| 7  | 3.5736850  | -0.0005980 | -0.6708960 |
| 1  | 3.8730480  | 0.9432780  | -0.8787570 |
| 1  | 3.4820500  | -0.5007870 | -1.5456620 |
| 1  | 4.2994400  | -0.4488620 | -0.1268220 |
| 8  | -0.1842500 | 0.0012840  | 1.3396960  |
| 6  | -1.2806580 | -0.0000600 | 0.5382330  |
| 1  | -2.1406250 | -0.0003030 | 1.1982750  |
| 17 | -1.4039330 | 1.4578470  | -0.4900950 |
| 17 | -1.4016920 | -1.4598030 | -0.4880010 |
| 17 | 1.3131690  | 0.0020120  | 0.5135230  |

**H<sub>3</sub>N...ClOCHF<sub>2</sub>**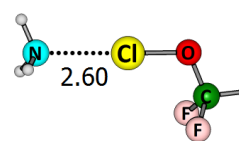

SCF E= -830.3510  
 ZPE= -830.2862  
 G= -830.3211  
 H= -830.2767

|    |            |            |            |
|----|------------|------------|------------|
| 7  | -3.2669000 | -0.4737290 | 0.0006180  |
| 1  | -3.4931300 | -0.8590000 | 0.9084460  |
| 1  | -3.3305520 | -1.2196880 | -0.6801210 |
| 1  | -3.9666730 | 0.2200760  | -0.2288130 |
| 8  | 0.7517560  | 1.0799010  | -0.0016360 |
| 6  | 1.7058020  | 0.1151610  | -0.0002980 |
| 1  | 2.6711120  | 0.6202630  | -0.0011210 |
| 9  | 1.6112670  | -0.6868170 | 1.0794990  |
| 9  | 1.6110540  | -0.6899850 | -1.0777450 |
| 17 | -0.8389530 | 0.4479700  | -0.0002130 |

**H<sub>3</sub>N...ClOCCIF<sub>2</sub>**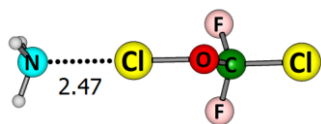

SCF E= -1289.9558  
 ZPE= -1289.9013  
 G= -1289.9377  
 H= -1289.8909

|    |            |            |            |
|----|------------|------------|------------|
| 7  | 3.9335290  | 0.1362140  | 0.0009740  |
| 1  | 4.2575500  | 0.3187560  | 0.9419170  |
| 1  | 4.1101000  | 0.9580530  | -0.5622180 |
| 1  | 4.4714130  | -0.6320410 | -0.3786510 |
| 8  | -0.1510810 | -0.8542100 | -0.0009380 |
| 6  | -0.9761520 | 0.2103720  | -0.0001670 |
| 9  | -0.8015970 | 0.9926110  | 1.0712340  |
| 9  | -0.8029350 | 0.9929400  | -1.0715850 |
| 17 | -2.6306500 | -0.4173040 | 0.0008010  |
| 17 | 1.5208020  | -0.4001540 | -0.0005780 |

**H<sub>3</sub>N...ClOCCl<sub>3</sub>**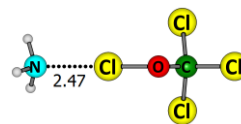

SCF E= -2010.6417  
 ZPE= -2010.5912  
 G= -2010.6293  
 H= -2010.5799

|    |            |            |            |
|----|------------|------------|------------|
| 7  | 4.0838970  | 0.0008950  | 0.0737450  |
| 1  | 4.2487230  | -0.7079510 | 0.7768010  |
| 1  | 4.3367680  | 0.9000860  | 0.4626060  |
| 1  | 4.6873470  | -0.1867020 | -0.7163790 |
| 8  | 0.0497120  | -0.0007070 | -1.0841960 |
| 6  | -0.8555840 | 0.0001160  | -0.0767020 |
| 17 | -0.7241330 | -1.4514160 | 0.9626000  |
| 17 | -0.7201560 | 1.4499230  | 0.9643210  |
| 17 | -2.4372530 | 0.0027490  | -0.8750000 |
| 17 | 1.6977590  | -0.0016520 | -0.5757720 |

**H<sub>3</sub>N...ClOCF<sub>3</sub>**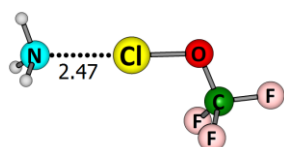

SCF E= -929.6163  
 ZPE= -929.5599  
 G= -929.5970  
 H= -929.5499

|    |            |            |            |
|----|------------|------------|------------|
| 7  | -3.5408290 | 0.3208310  | -0.0000070 |
| 1  | -3.7284490 | 0.8858230  | -0.8182000 |
| 1  | -3.7312290 | 0.8784860  | 0.8225670  |
| 1  | -4.1753540 | -0.4672940 | -0.0046280 |
| 8  | 0.4470870  | -0.9605070 | -0.0001400 |
| 6  | 1.3359320  | 0.0541430  | -0.0000330 |
| 9  | 1.2239970  | 0.8391790  | -1.0726210 |
| 9  | 1.2241680  | 0.8388120  | 1.0728420  |
| 9  | 2.5469910  | -0.4843830 | -0.0002320 |
| 17 | -1.1839910 | -0.4074180 | 0.0001010  |

**H<sub>3</sub>N...ClNO<sub>2</sub>BeCl<sub>2</sub>**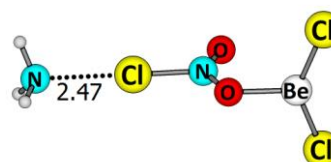

SCF E= -1657.1693  
 ZPE= -1657.1130  
 G= -1657.1555  
 H= -1657.1003

|    |            |            |            |
|----|------------|------------|------------|
| 7  | 0.5804450  | -0.0007540 | 0.4194680  |
| 8  | 0.2324960  | -0.0011240 | 1.5450670  |
| 8  | -0.1566030 | -0.0002570 | -0.5657820 |
| 7  | 4.7353390  | 0.0006500  | -0.4577220 |
| 1  | 5.1617080  | 0.8736530  | -0.1722530 |
| 1  | 5.2062550  | -0.7522720 | 0.0289590  |
| 1  | 4.8972210  | -0.1177280 | -1.4503100 |
| 4  | -1.8497070 | 0.0003010  | -0.2736730 |
| 17 | -2.5011040 | -1.7359320 | -0.1652650 |
| 17 | -2.4996740 | 1.7370220  | -0.1645040 |
| 17 | 2.3134850  | -0.0006830 | 0.0428160  |

**H<sub>3</sub>N...ClC<sub>3</sub>N**

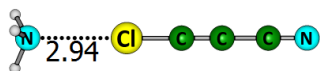

SCF E= -685.7321  
 ZPE= -685.6766  
 G= -685.7106  
 H= -685.6668

|    |            |            |            |
|----|------------|------------|------------|
| 7  | 4.0754350  | 0.0025280  | -0.0003030 |
| 1  | 4.4483750  | 0.6991390  | 0.6330450  |
| 1  | 4.4538050  | 0.2047540  | -0.9175410 |
| 1  | 4.4561060  | -0.8911330 | 0.2858220  |
| 6  | -0.4970980 | -0.0017980 | -0.0000770 |
| 6  | -1.6968960 | -0.0008000 | 0.0000480  |
| 6  | -3.0725270 | 0.0007420  | 0.0000600  |
| 7  | -4.2223420 | 0.0026950  | -0.0001650 |
| 17 | 1.1334820  | -0.0022460 | 0.0001040  |

**H<sub>3</sub>N...ClC<sub>5</sub>N**

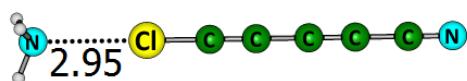

SCF E= -761.8854  
 ZPE= -761.8194  
 G= -761.8566  
 H= -761.8076

|    |            |            |            |
|----|------------|------------|------------|
| 6  | 0.4915690  | 0.0011090  | -0.0001770 |
| 6  | -0.7119150 | 0.0018790  | 0.0008470  |
| 7  | -5.2914230 | -0.0034030 | -0.0022910 |
| 1  | -5.6681680 | -0.7154160 | -0.6159060 |
| 1  | -5.6709450 | 0.8833410  | -0.3106100 |
| 1  | -5.6668860 | -0.1806160 | 0.9212480  |
| 6  | 1.8550880  | -0.0002090 | 0.0001170  |
| 6  | 3.0601390  | -0.0012100 | -0.0000480 |
| 6  | 4.4332540  | -0.0010440 | -0.0005520 |
| 7  | 5.5838520  | -0.0010830 | -0.0009210 |
| 17 | -2.3417540 | 0.0024080  | 0.0015660  |

**H<sub>3</sub>N...FCN**

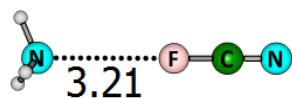

SCF E= -249.2042  
 ZPE= -249.1583  
 G= -249.1907  
 H= -249.1501

|   |            |            |            |
|---|------------|------------|------------|
| 7 | -2.9327000 | -0.0008650 | -0.0014130 |
| 1 | -3.3124350 | 0.6110610  | 0.7101250  |
| 1 | -3.3074500 | -0.9248210 | 0.1740370  |
| 1 | -3.3117410 | 0.3075830  | -0.8879780 |
| 9 | 0.2755350  | 0.0030160  | 0.0035010  |
| 6 | 1.5355110  | 0.0001910  | 0.0004180  |
| 7 | 2.6810920  | -0.0022940 | -0.0029010 |

**H<sub>3</sub>N...FNO<sub>2</sub>BeCl<sub>2</sub>**

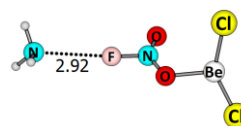

SCF E= -1296.7746  
 ZPE= -1296.7180  
 G= -1296.7621  
 H= -1296.7046

|    |            |            |            |
|----|------------|------------|------------|
| 7  | 0.8451030  | 0.0236650  | 0.5795790  |
| 8  | 0.6681120  | 0.6459480  | 1.5417740  |
| 8  | 0.0807710  | -0.5082980 | -0.1927810 |
| 9  | 2.1394230  | -0.1769900 | 0.2231480  |
| 7  | 4.9211150  | -0.3682150 | -0.6476450 |
| 1  | 5.3891750  | 0.5249870  | -0.5562160 |
| 1  | 5.4975120  | -1.0515530 | -0.1724240 |
| 1  | 4.9344400  | -0.6072380 | -1.6315470 |
| 4  | -1.6309020 | -0.0486320 | -0.2420340 |
| 17 | -2.6934320 | -1.5421580 | -0.0886540 |
| 17 | -1.7128570 | 1.7910920  | -0.4404930 |

### H<sub>3</sub>N...FCNBeCl<sub>2</sub>

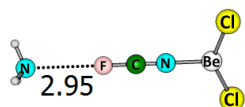

SCF E= -1184.5457  
ZPE= -1184.4923  
G= -1184.5347  
H= -1184.4799

|    |            |            |            |
|----|------------|------------|------------|
| 6  | -1.2370720 | 0.0000960  | 0.0124200  |
| 7  | -0.0999870 | 0.0001500  | 0.0074720  |
| 4  | 1.6417190  | 0.0000470  | -0.0005780 |
| 17 | 2.3330040  | 1.7272750  | -0.0039030 |
| 17 | 2.3323620  | -1.7274910 | -0.0039020 |
| 9  | -2.4782500 | 0.0000310  | 0.0174970  |
| 7  | -5.4304620 | 0.0001840  | -0.0119380 |
| 1  | -5.8003450 | 0.8065030  | -0.5005490 |
| 1  | -5.8003950 | -0.8178900 | -0.4805310 |
| 1  | -5.8375330 | 0.0116750  | 0.9153580  |

### H<sub>3</sub>N...FC<sub>3</sub>N

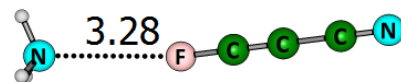

SCF E= -325.3520  
ZPE= -325.2954  
G= -325.3309  
H= -325.2855

|   |            |            |            |
|---|------------|------------|------------|
| 7 | 4.2930400  | 0.1993430  | 0.0004190  |
| 1 | 4.6284310  | 0.7124790  | 0.8060110  |
| 1 | 4.6227230  | 0.6910410  | -0.8207250 |
| 1 | 4.7561870  | -0.7007070 | 0.0106620  |
| 9 | 1.0482870  | -0.2991760 | -0.0005510 |
| 6 | -0.2057550 | -0.1721110 | 0.0014930  |
| 6 | -1.3916690 | -0.0518620 | -0.0002320 |
| 6 | -2.7621640 | 0.0869110  | -0.0000890 |
| 7 | -3.9050960 | 0.2023920  | -0.0001370 |

**Table S7:** Cartesian coordinates in (Å) and energy data (a.u.) of halogen bonded pyridine complexes at M06-2X/aug-cc-pVTZ level of theory. All the optimized structures are corresponding to minima on the potential energy surface.

| <b>C<sub>5</sub>H<sub>5</sub>N... BrCF<sub>3</sub></b>                              |            |            |            | <b>C<sub>5</sub>H<sub>5</sub>N...BrOCH<sub>3</sub></b>                               |            |            |            |
|-------------------------------------------------------------------------------------|------------|------------|------------|--------------------------------------------------------------------------------------|------------|------------|------------|
| 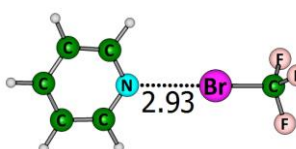   |            |            |            |    |            |            |            |
| SCF E= -3160.1787                                                                   |            |            |            | SCF E= -2937.5861                                                                    |            |            |            |
| ZPE= -3160.0738                                                                     |            |            |            | ZPE= -2937.4536                                                                      |            |            |            |
| G= -3160.1159                                                                       |            |            |            | G= -2937.4937                                                                        |            |            |            |
| H= -3160.0619                                                                       |            |            |            | H= -2937.4426                                                                        |            |            |            |
| 35                                                                                  | 0.9620840  | 0.0089920  | -0.0001060 | 35                                                                                   | 1.3823450  | -0.2281170 | -0.0824870 |
| 6                                                                                   | 2.8867770  | -0.0038520 | 0.0000040  | 8                                                                                    | 3.2080270  | -0.3949230 | -0.1652470 |
| 9                                                                                   | 3.3546740  | -0.6265570 | 1.0745810  | 6                                                                                    | 3.8603760  | 0.7648180  | 0.3049750  |
| 9                                                                                   | 3.3548910  | -0.6285090 | -1.0733240 | 1                                                                                    | 3.6240080  | 0.9604370  | 1.3541310  |
| 9                                                                                   | 3.3684600  | 1.2327130  | -0.0010390 | 1                                                                                    | 4.9282670  | 0.5696720  | 0.2055760  |
| 6                                                                                   | -4.7471700 | -0.0184030 | -0.0000970 | 1                                                                                    | 3.5963260  | 1.6424170  | -0.2906780 |
| 6                                                                                   | -4.0273360 | -1.2025100 | -0.0000180 | 6                                                                                    | -3.9706100 | 0.1878080  | 0.0418350  |
| 6                                                                                   | -2.6418750 | -1.1330960 | 0.0001170  | 6                                                                                    | -3.3606640 | -1.0539570 | 0.1208100  |
| 7                                                                                   | -1.9696440 | 0.0144480  | 0.0001790  | 6                                                                                    | -1.9753900 | -1.1122790 | 0.1020230  |
| 6                                                                                   | -2.6688790 | 1.1458130  | 0.0001110  | 7                                                                                    | -1.2107670 | -0.0286790 | 0.0111000  |
| 6                                                                                   | -4.0556830 | 1.1824040  | -0.0000350 | 6                                                                                    | -1.7990840 | 1.1607730  | -0.0647910 |
| 1                                                                                   | -5.8287090 | -0.0312920 | -0.0002050 | 6                                                                                    | -3.1763220 | 1.3194940  | -0.0529520 |
| 1                                                                                   | -4.5238960 | -2.1621920 | -0.0000550 | 1                                                                                    | -5.0488260 | 0.2726250  | 0.0529440  |
| 1                                                                                   | -2.0433060 | -2.0367970 | 0.0001810  | 1                                                                                    | -3.9409190 | -1.9624170 | 0.1938950  |
| 1                                                                                   | -2.0919470 | 2.0634130  | 0.0001730  | 1                                                                                    | -1.4536770 | -2.0603010 | 0.1609640  |
| 1                                                                                   | -4.5748280 | 2.1300370  | -0.0000990 | 1                                                                                    | -1.1361280 | 2.0148990  | -0.1381630 |
|                                                                                     |            |            |            | 1                                                                                    | -3.6098290 | 2.3069680  | -0.1187450 |
| <b>C<sub>5</sub>H<sub>5</sub>N...BrCCH</b>                                          |            |            |            | <b>C<sub>5</sub>H<sub>5</sub>N...BrCHCH<sub>2</sub></b>                              |            |            |            |
|  |            |            |            |  |            |            |            |
| SCF E= -2899.2340                                                                   |            |            |            | SCF E= -2900.4874                                                                    |            |            |            |
| ZPE= -2899.1245                                                                     |            |            |            | ZPE= -2900.3546                                                                      |            |            |            |
| G= -2899.1624                                                                       |            |            |            | G= -2900.3948                                                                        |            |            |            |



| H= -2899.1142 |            |            |            | H= -2900.3438 |            |            |            |
|---------------|------------|------------|------------|---------------|------------|------------|------------|
| 35            | -1.6576960 | 0.0001560  | -0.0000020 | 35            | 1.6670050  | -0.3980730 | 0.0333030  |
| 6             | -3.4590000 | -0.0001310 | 0.0000220  | 6             | 3.5194680  | -0.0401450 | 0.0795390  |
| 6             | -4.6560420 | -0.0003240 | 0.0000410  | 6             | 4.0367160  | 1.1438370  | -0.1822950 |
| 1             | -5.7181120 | -0.0004920 | 0.0000610  | 1             | 5.1088100  | 1.2819460  | -0.1368320 |
| 6             | 4.0505320  | -0.0004200 | 0.0000710  | 1             | 3.4222720  | 1.9932600  | -0.4455130 |
| 6             | 3.3444340  | -1.1927260 | 0.0000280  | 1             | 4.1112970  | -0.9035950 | 0.3438030  |
| 6             | 1.9581960  | -1.1392640 | -0.0000510 | 6             | -4.0361430 | 0.6534570  | 0.0077750  |
| 7             | 1.2723980  | 0.0003220  | -0.0000910 | 6             | -2.9211730 | 1.4728300  | 0.0760120  |
| 6             | 1.9588070  | 1.1395420  | -0.0000510 | 6             | -1.6650530 | 0.8831860  | 0.0571000  |
| 6             | 3.3450760  | 1.1922630  | 0.0000310  | 7             | -1.4736290 | -0.4304000 | -0.0229380 |
| 1             | 5.1321580  | -0.0007110 | 0.0001360  | 6             | -2.5511150 | -1.2077270 | -0.0877240 |
| 1             | 3.8520490  | -2.1466050 | 0.0000590  | 6             | -3.8491060 | -0.7168810 | -0.0758600 |
| 1             | 1.3700810  | -2.0497640 | -0.0000800 | 1             | -5.0325430 | 1.0744870  | 0.0198030  |
| 1             | 1.3711810  | 2.0503560  | -0.0000920 | 1             | -3.0167910 | 2.5473050  | 0.1423140  |
| 1             | 3.8532000  | 2.1458700  | 0.0000610  | 1             | -0.7685060 | 1.4911370  | 0.1071770  |
|               |            |            |            | 1             | -2.3683100 | -2.2739760 | -0.1522220 |
|               |            |            |            | 1             | -4.6875480 | -1.3965350 | -0.1308350 |

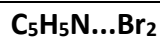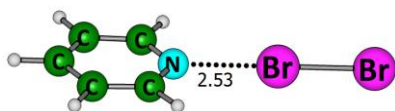

SCF E= -5396.7488  
 ZPE= -5396.6575  
 G= -5396.6950  
 H= -5396.6480

|    |            |            |            |
|----|------------|------------|------------|
| 35 | -0.7403550 | 0.0001780  | 0.0001550  |
| 35 | -3.0787620 | -0.0001090 | -0.0001140 |
| 6  | 4.5518220  | -0.0004460 | -0.0001500 |
| 6  | 3.8490220  | 1.1941730  | -0.0000780 |
| 6  | 2.4636140  | 1.1456820  | 0.0000170  |
| 7  | 1.7903540  | 0.0003310  | 0.0000700  |
| 6  | 2.4629660  | -1.1453840 | 0.0000180  |

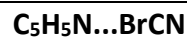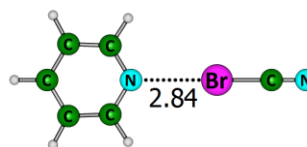

SCF E= -2915.3348  
 ZPE= -2915.2359  
 G= -2915.2732  
 H= -2915.2260

|    |           |           |           |
|----|-----------|-----------|-----------|
| 35 | -1.629760 | -0.000165 | 0.000044  |
| 6  | -3.433875 | 0.000167  | 0.000069  |
| 7  | -4.582367 | 0.000360  | -0.000076 |
| 6  | 3.985250  | 0.000380  | 0.000116  |
| 6  | 3.280247  | -1.192595 | 0.000032  |
| 6  | 1.894492  | -1.140682 | -0.000104 |
| 7  | 1.209168  | -0.000271 | -0.000179 |

|   |           |            |            |   |          |           |           |
|---|-----------|------------|------------|---|----------|-----------|-----------|
| 6 | 3.8483600 | -1.1946600 | -0.0000790 | 6 | 1.893952 | 1.140443  | -0.000117 |
| 1 | 5.6332860 | -0.0007400 | -0.0002190 | 6 | 3.279691 | 1.193015  | 0.000040  |
| 1 | 4.3585160 | 2.1467770  | -0.0001060 | 1 | 5.066782 | 0.000623  | 0.000222  |
| 1 | 1.8669760 | 2.0500020  | 0.0000660  | 1 | 3.788357 | -2.146067 | 0.000072  |
| 1 | 1.8658350 | -2.0493830 | 0.0000670  | 1 | 1.306956 | -2.051430 | -0.000167 |
| 1 | 4.3573040 | -2.1475600 | -0.0001070 | 1 | 1.306005 | 2.050931  | -0.000188 |
|   |           |            |            | 1 | 3.787342 | 2.146733  | 0.000105  |

**C<sub>5</sub>H<sub>5</sub>N... BrOH**

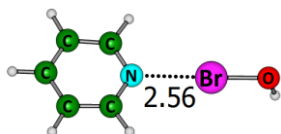

SCF E= -2898.2928  
 ZPE= -2898.1886  
 G= -2898.2244  
 H= -2898.1790

|    |            |            |            |
|----|------------|------------|------------|
| 35 | -1.7380310 | 0.0012490  | -0.0107020 |
| 8  | -3.5799690 | 0.0110120  | -0.0807120 |
| 1  | -3.8618190 | -0.1128130 | 0.8304280  |
| 6  | 3.5928340  | 0.0007110  | -0.0002630 |
| 6  | 2.8878810  | 1.1939540  | 0.0044810  |
| 6  | 1.5022910  | 1.1426300  | 0.0094500  |
| 7  | 0.8262780  | -0.0016420 | 0.0100240  |
| 6  | 1.5042650  | -1.1447220 | 0.0047560  |
| 6  | 2.8899110  | -1.1937520 | -0.0001870 |
| 1  | 4.6743650  | 0.0016260  | -0.0045740 |
| 1  | 3.3960680  | 2.1473290  | 0.0037180  |
| 1  | 0.9059680  | 2.0473150  | 0.0122470  |
| 1  | 0.9095090  | -2.0504420 | 0.0036100  |
| 1  | 3.3997020  | -2.1462630 | -0.0047360 |

**C<sub>5</sub>H<sub>5</sub>N...BrOF**

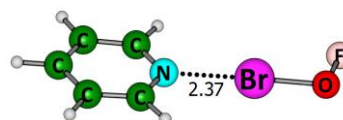

SCF E= -2997.4195  
 ZPE= -2997.3237  
 G= -2997.3605  
 H= -2997.3137

|    |            |            |            |
|----|------------|------------|------------|
| 35 | -1.2837340 | -0.2212790 | 0.0000380  |
| 8  | -3.1420460 | -0.4297150 | 0.0001930  |
| 9  | -3.6890730 | 0.8683790  | -0.0000930 |
| 6  | 3.8210950  | 0.1994500  | 0.0001940  |
| 6  | 3.2257810  | -1.0522300 | 0.0000360  |
| 6  | 1.8427220  | -1.1266200 | -0.0001700 |
| 7  | 1.0759440  | -0.0407770 | -0.0003120 |
| 6  | 1.6421010  | 1.1614390  | -0.0001660 |
| 6  | 3.0171250  | 1.3285880  | 0.0001120  |
| 1  | 4.8983440  | 0.2942270  | 0.0003830  |
| 1  | 3.8163600  | -1.9566110 | 0.0000540  |
| 1  | 1.3237360  | -2.0773620 | -0.0003180 |
| 1  | 0.9645190  | 2.0065390  | -0.0002470 |
| 1  | 3.4412160  | 2.3219520  | 0.0002290  |

**C<sub>5</sub>H<sub>5</sub>N...BrC<sub>6</sub>H<sub>5</sub>**

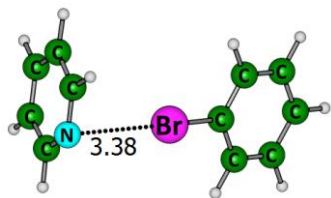

SCF E= -3054.1373  
 ZPE= -3053.9562  
 G= -3054.0004  
 H= -3053.9431

|    |            |            |            |
|----|------------|------------|------------|
| 35 | -0.0606680 | -0.2626970 | -0.5603620 |
| 6  | -1.8934420 | -0.0444420 | -0.1326530 |
| 6  | -2.4570650 | 1.2213510  | -0.1635820 |
| 6  | -2.6470750 | -1.1572460 | 0.2070470  |
| 6  | -3.8001190 | 1.3702680  | 0.1529070  |
| 1  | -1.8532100 | 2.0758740  | -0.4329680 |
| 6  | -3.9887270 | -0.9940130 | 0.5215260  |
| 1  | -2.1889650 | -2.1356300 | 0.2245040  |
| 6  | -4.5680100 | 0.2665240  | 0.4958210  |
| 1  | -4.2448570 | 2.3557790  | 0.1286330  |
| 1  | -4.5805610 | -1.8591890 | 0.7877080  |
| 1  | -5.6136960 | 0.3888050  | 0.7411840  |
| 6  | 3.2339710  | 0.9036800  | 1.3977170  |
| 6  | 3.1789310  | -0.4755820 | 1.5123420  |
| 6  | 3.2034610  | -1.2370320 | 0.3523620  |
| 7  | 3.2775960  | -0.7141750 | -0.8691680 |
| 6  | 3.3316570  | 0.6120310  | -0.9650420 |
| 6  | 3.3132430  | 1.4616120  | 0.1322320  |
| 1  | 3.2127510  | 1.5321000  | 2.2779540  |
| 1  | 3.1107760  | -0.9568790 | 2.4775590  |
| 1  | 3.1545620  | -2.3183730 | 0.4067460  |
| 1  | 3.3881170  | 1.0160330  | -1.9692350 |
| 1  | 3.3543420  | 2.5321880  | -0.0092990 |

**C<sub>5</sub>H<sub>5</sub>N...BrC<sub>6</sub>H<sub>4</sub>Cl**

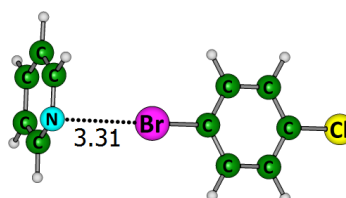

SCF E= -3513.7474  
 ZPE= -3513.5758  
 G= -3513.6225  
 H= -3513.5615

|    |            |            |            |
|----|------------|------------|------------|
| 6  | -1.1522330 | -0.1906570 | -0.2125590 |
| 6  | -1.9348800 | -1.2749950 | 0.1525260  |
| 6  | -1.7171380 | 1.0606640  | -0.4030850 |
| 6  | -3.2994380 | -1.1061680 | 0.3305320  |
| 1  | -1.4830080 | -2.2456430 | 0.2975220  |
| 6  | -3.0819800 | 1.2301470  | -0.2268860 |
| 1  | -1.0974650 | 1.8976410  | -0.6905000 |
| 6  | -3.8617440 | 0.1451370  | 0.1383250  |
| 1  | -3.9236430 | -1.9403180 | 0.6167040  |
| 1  | -3.5393470 | 2.1980260  | -0.3738010 |
| 17 | -5.5715560 | 0.3573830  | 0.3577490  |
| 35 | 0.7081030  | -0.4283810 | -0.4639160 |
| 6  | 4.1190220  | 1.1905730  | 1.2636720  |
| 6  | 4.1180090  | 1.5520340  | -0.0742880 |
| 6  | 4.0512480  | 0.5494310  | -1.0310050 |
| 7  | 3.9877390  | -0.7467840 | -0.7336260 |
| 6  | 3.9895930  | -1.0798820 | 0.5548830  |
| 6  | 4.0536790  | -0.1542400 | 1.5871450  |
| 1  | 4.1679410  | 1.9436760  | 2.0387290  |
| 1  | 4.1653150  | 2.5884060  | -0.3770060 |
| 1  | 4.0440730  | 0.7971770  | -2.0859560 |
| 1  | 3.9314540  | -2.1399150 | 0.7736910  |
| 1  | 4.0485220  | -0.4860120 | 2.6157940  |

**C<sub>5</sub>H<sub>5</sub>N...BrH**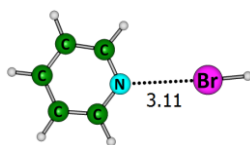

SCF E= -2823.1085  
 ZPE= -2823.0103  
 G= -2823.0455  
 H= -2823.0022

|    |            |            |          |
|----|------------|------------|----------|
| 35 | 2.4045850  | -0.0056570 | -0.01542 |
| 1  | 3.8183400  | 0.1275810  | -0.12546 |
| 6  | -3.4588510 | 0.1480800  | -0.07286 |
| 6  | -2.6311200 | 1.2579180  | -0.01866 |
| 6  | -1.2609300 | 1.0568700  | 0.070071 |
| 7  | -0.6992200 | -0.1481030 | 0.106831 |
| 6  | -1.5030610 | -1.2065120 | 0.05419  |
| 6  | -2.8843490 | -1.1121870 | -0.03592 |
| 1  | -4.5322100 | 0.2636070  | -0.14276 |
| 1  | -3.0330510 | 2.2606750  | -0.04494 |
| 1  | -0.5813800 | 1.9007030  | 0.112658 |
| 1  | -1.0188660 | -2.1757260 | 0.085941 |
| 1  | -3.4888980 | -2.0071470 | -0.07451 |

**C<sub>5</sub>H<sub>5</sub>N...BrOCH<sub>2</sub>Cl**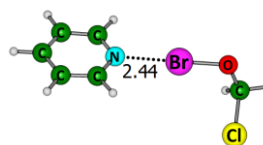

SCF E= -3397.2037  
 ZPE= -3397.0794  
 G= -3397.1209  
 H= -3397.0678

|    |            |            |            |
|----|------------|------------|------------|
| 35 | 0.6594750  | -0.5507730 | -0.3476040 |
| 8  | 2.4706350  | -0.9327500 | -0.5559520 |
| 6  | 3.2465680  | -0.4870530 | 0.4743620  |
| 1  | 2.8271650  | -0.6983270 | 1.4568190  |
| 1  | 4.2368390  | -0.9179710 | 0.3544160  |
| 17 | 3.4944060  | 1.3158570  | 0.4504100  |
| 6  | -4.3907370 | 0.5028050  | 0.2904430  |
| 6  | -3.8622230 | -0.6943890 | 0.7470670  |
| 6  | -2.5163770 | -0.9463610 | 0.5342100  |
| 7  | -1.7207090 | -0.0834540 | -0.0888100 |
| 6  | -2.2253470 | 1.0653340  | -0.5274050 |
| 6  | -3.5594410 | 1.4008760  | -0.3600790 |
| 1  | -5.4367820 | 0.7327930  | 0.4406460  |
| 1  | -4.4753410 | -1.4211380 | 1.2596090  |
| 1  | -2.0516300 | -1.8651510 | 0.8711540  |
| 1  | -1.5304580 | 1.7312780  | -1.0246520 |
| 1  | -3.9310780 | 2.3449130  | -0.7311100 |

**C<sub>5</sub>H<sub>5</sub>N...BrCH<sub>2</sub>CH<sub>2</sub>Br**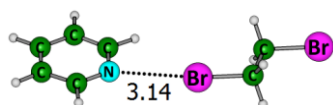

SCF E= -5475.3659  
 ZPE= -5475.2184  
 G= -5475.2628  
 H= -5475.2058

**C<sub>5</sub>H<sub>5</sub>N...BrCCl<sub>3</sub>**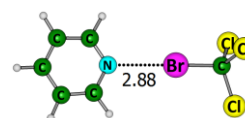

SCF E= -4241.2108  
 ZPE= -4241.1114  
 G= -4241.1560  
 H= -4241.0982

|    |            |            |            |    |            |            |            |
|----|------------|------------|------------|----|------------|------------|------------|
| 35 | 0.0762900  | -0.9078280 | -0.0000430 | 35 | -0.2859360 | -0.0280990 | -0.0064490 |
| 6  | -1.8736220 | -0.9186220 | -0.0000440 | 6  | -2.2276520 | 0.0044240  | 0.0017340  |
| 1  | -2.1890700 | -1.4555430 | -0.8881230 | 17 | -2.8310560 | -0.4295750 | 1.6103330  |
| 1  | -2.1890680 | -1.4556120 | 0.8879940  | 17 | -2.8529830 | -1.1541010 | -1.1849150 |
| 6  | -2.3684490 | 0.5026020  | 0.0000110  | 17 | -2.8041780 | 1.6282470  | -0.4134140 |
| 1  | -2.0596470 | 1.0413070  | 0.8889960  | 6  | 5.3646810  | 0.0462950  | 0.0068810  |
| 1  | -2.0596700 | 1.0413630  | -0.8889490 | 6  | 4.6958010  | -1.1672370 | 0.0048940  |
| 35 | -4.3229150 | 0.5103600  | 0.0000350  | 6  | 3.3086080  | -1.1566780 | -0.0018860 |
| 6  | 5.4987640  | 1.1623860  | 0.0000330  | 7  | 2.5899970  | -0.0376760 | -0.0066300 |
| 6  | 5.5580860  | -0.2219670 | 0.0001070  | 6  | 3.2395590  | 1.1226040  | -0.0045150 |
| 6  | 4.3674680  | -0.9350460 | 0.0000830  | 6  | 4.6233560  | 1.2171330  | 0.0021070  |
| 7  | 3.1687980  | -0.3588400 | -0.0000060 | 1  | 6.4457920  | 0.0792400  | 0.0122080  |
| 6  | 3.1238320  | 0.9702560  | -0.0000780 | 1  | 5.2325080  | -2.1049960 | 0.0086060  |
| 6  | 4.2556360  | 1.7736520  | -0.0000630 | 1  | 2.7475960  | -2.0839960 | -0.0035290 |
| 1  | 6.4047270  | 1.7535290  | 0.0000480  | 1  | 2.6232040  | 2.0142740  | -0.0081310 |
| 1  | 6.5041560  | -0.7442540 | 0.0001850  | 1  | 5.1022450  | 2.1857460  | 0.0036190  |
| 1  | 4.3772150  | -2.0186600 | 0.0001410  |    |            |            |            |
| 1  | 2.1331660  | 1.4116150  | -0.0001510 |    |            |            |            |
| 1  | 4.1581770  | 2.8499280  | -0.0001240 |    |            |            |            |

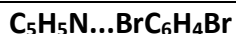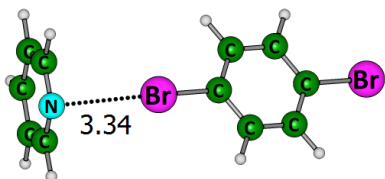

SCF E= -5627.7801  
 ZPE= -5627.6098  
 G= -5627.6564  
 H= -5627.5953

|    |            |            |            |
|----|------------|------------|------------|
| 35 | 1.4334790  | -0.4029610 | -0.4494790 |
| 6  | -0.4395450 | -0.2211940 | -0.2491800 |
| 6  | -1.2002470 | -1.3311010 | 0.0834230  |
| 6  | -1.0342520 | 1.0158340  | -0.4417860 |
| 6  | -2.5739470 | -1.2028390 | 0.2243350  |
| 1  | -0.7258270 | -2.2907480 | 0.2297930  |

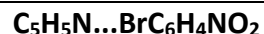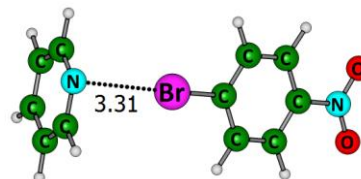

SCF E= -3258.6499  
 ZPE= -3258.4655  
 G= -3258.5134  
 H= -3258.4500

|   |           |            |            |
|---|-----------|------------|------------|
| 6 | 0.8708530 | -0.1750370 | -0.3329160 |
| 6 | 1.4694030 | 1.0709360  | -0.4660580 |
| 6 | 1.6103840 | -1.2969360 | 0.0179210  |
| 6 | 2.8295070 | 1.1994170  | -0.2428150 |
| 1 | 0.8758670 | 1.9298300  | -0.7419930 |
| 6 | 2.9706900 | -1.1718020 | 0.2415380  |

|                                                                                     |            |            |            |                                                                                      |            |            |            |
|-------------------------------------------------------------------------------------|------------|------------|------------|--------------------------------------------------------------------------------------|------------|------------|------------|
| 6                                                                                   | -2.4080770 | 1.1456300  | -0.3008450 | 1                                                                                    | 1.1255530  | -2.2570780 | 0.1150710  |
| 1                                                                                   | -0.4309820 | 1.8733530  | -0.7024940 | 6                                                                                    | 3.5542890  | 0.0749500  | 0.1076960  |
| 6                                                                                   | -3.1662190 | 0.0343490  | 0.0301650  | 1                                                                                    | 3.3294480  | 2.1513080  | -0.3374260 |
| 1                                                                                   | -3.1779250 | -2.0604710 | 0.4824910  | 1                                                                                    | 3.5780860  | -2.0206790 | 0.5162340  |
| 1                                                                                   | -2.8829520 | 2.1048000  | -0.4488190 | 35                                                                                   | -0.9834960 | -0.3494230 | -0.6331630 |
| 35                                                                                  | -5.0430360 | 0.2072640  | 0.2172960  | 6                                                                                    | -4.2038120 | 1.0027260  | 1.5284270  |
| 6                                                                                   | 4.7086210  | 1.2373790  | 1.2572920  | 6                                                                                    | -4.1587280 | -0.3770890 | 1.6432360  |
| 6                                                                                   | 4.7417250  | 1.5619370  | -0.0891210 | 6                                                                                    | -4.1989110 | -1.1387500 | 0.4837690  |
| 6                                                                                   | 4.7572260  | 0.5309630  | -1.0179400 | 7                                                                                    | -4.2775580 | -0.6153020 | -0.7375100 |
| 7                                                                                   | 4.7429640  | -0.7578170 | -0.6861180 | 6                                                                                    | -4.3242830 | 0.7114440  | -0.8335230 |
| 6                                                                                   | 4.7137960  | -1.0558510 | 0.6107570  | 6                                                                                    | -4.2902770 | 1.5610210  | 0.2633550  |
| 6                                                                                   | 4.6955550  | -0.1003500 | 1.6168920  | 1                                                                                    | -4.1724210 | 1.6312420  | 2.4082900  |
| 1                                                                                   | 4.6903760  | 2.0124080  | 2.0117540  | 1                                                                                    | -4.0890940 | -0.8584780 | 2.6083050  |
| 1                                                                                   | 4.7507800  | 2.5908190  | -0.4197310 | 1                                                                                    | -4.1593510 | -2.2204880 | 0.5379420  |
| 1                                                                                   | 4.7768930  | 0.7497290  | -2.0792680 | 1                                                                                    | -4.3878390 | 1.1153510  | -1.8373260 |
| 1                                                                                   | 4.6987940  | -2.1110820 | 0.8576210  | 1                                                                                    | -4.3279350 | 2.6317870  | 0.1222900  |
| 1                                                                                   | 4.6667990  | -0.4032640 | 2.6539200  | 7                                                                                    | 5.0015010  | 0.2106200  | 0.3480010  |
|                                                                                     |            |            |            | 8                                                                                    | 5.4862840  | 1.3139430  | 0.2325650  |
|                                                                                     |            |            |            | 8                                                                                    | 5.6146850  | -0.7896290 | 0.6464450  |
| <b>C<sub>5</sub>H<sub>5</sub>N...BrOCl</b>                                          |            |            |            | <b>C<sub>5</sub>H<sub>5</sub>N...BrOBr</b>                                           |            |            |            |
| 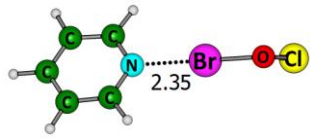 |            |            |            |  |            |            |            |
| SCF E= -3357.8380                                                                   |            |            |            | SCF E= -5471.8844                                                                    |            |            |            |
| ZPE= -3357.7431                                                                     |            |            |            | ZPE= -5471.7898                                                                      |            |            |            |
| G= -3357.7821                                                                       |            |            |            | G= -5471.8283                                                                        |            |            |            |
| H= -3357.7327                                                                       |            |            |            | H= -5471.7795                                                                        |            |            |            |
| 35                                                                                  | -0.9194260 | -0.2328070 | -0.2774390 | 35                                                                                   | -0.3092020 | -0.5537600 | -0.0002180 |
| 8                                                                                   | -2.7784040 | -0.4437780 | -0.5019380 | 8                                                                                    | -2.1457890 | -0.9686020 | -0.0000360 |
| 17                                                                                  | -3.6677320 | 0.4642840  | 0.5879750  | 35                                                                                   | -3.2131240 | 0.4917790  | 0.0001630  |
| 6                                                                                   | 4.1320780  | 0.2159030  | 0.2469870  | 6                                                                                    | 4.6732090  | 0.5560220  | 0.0002240  |
| 6                                                                                   | 3.3563050  | 1.3215990  | -0.0645380 | 6                                                                                    | 4.2702750  | -0.7701460 | 0.0003640  |
| 6                                                                                   | 1.9903620  | 1.1496440  | -0.2155430 | 6                                                                                    | 2.9129790  | -1.0492280 | 0.0001330  |
| 7                                                                                   | 1.4083340  | -0.0364490 | -0.0715890 | 7                                                                                    | 1.9956530  | -0.0883310 | -0.0001080 |

|   |           |            |            |   |           |            |            |
|---|-----------|------------|------------|---|-----------|------------|------------|
| 6 | 2.1469830 | -1.1003120 | 0.2264450  | 6 | 2.3763670 | 1.1848820  | -0.0002070 |
| 6 | 3.5192770 | -1.0185710 | 0.3953060  | 6 | 3.7111460 | 1.5537640  | -0.0001140 |
| 1 | 5.2015150 | 0.3156320  | 0.3736230  | 1 | 5.7247000 | 0.8089840  | 0.0003690  |
| 1 | 3.7953540 | 2.3007190  | -0.1885020 | 1 | 4.9885200 | -1.5768430 | 0.0006660  |
| 1 | 1.3325070 | 1.9753550  | -0.4570770 | 1 | 2.5380990 | -2.0651910 | 0.0003200  |
| 1 | 1.6129430 | -2.0366130 | 0.3320690  | 1 | 1.5794130 | 1.9187000  | -0.0005070 |
| 1 | 4.0878950 | -1.9038770 | 0.6393850  | 1 | 3.9835560 | 2.5990730  | -0.0002630 |

**C<sub>5</sub>H<sub>5</sub>N...BrOCH<sub>2</sub>F**

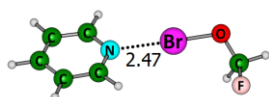

SCF E= -3036.8490  
 ZPE= -3036.7228  
 G= -3036.7628  
 H= -3036.7116

|    |            |            |            |
|----|------------|------------|------------|
| 35 | 0.9950420  | -0.3907070 | -0.1981250 |
| 8  | 2.8292010  | -0.6585790 | -0.3464930 |
| 6  | 3.5530570  | 0.0775700  | 0.5497910  |
| 1  | 3.1543620  | 0.0147600  | 1.5654340  |
| 1  | 4.5828650  | -0.2775420 | 0.4900260  |
| 9  | 3.5552750  | 1.4170370  | 0.2107490  |
| 6  | -4.1731570 | 0.3474690  | 0.1388710  |
| 6  | -3.3141400 | 1.4087000  | -0.0995640 |
| 6  | -1.9536350 | 1.1540600  | -0.1730460 |
| 7  | -1.4476560 | -0.0658710 | -0.0237620 |
| 6  | -2.2704240 | -1.0839930 | 0.2051460  |
| 6  | -3.6440200 | -0.9241610 | 0.2949870  |
| 1  | -5.2405910 | 0.5093250  | 0.2029270  |
| 1  | -3.6855490 | 2.4150860  | -0.2266080 |
| 1  | -1.2371450 | 1.9457520  | -0.3563840 |
| 1  | -1.8058760 | -2.0560530 | 0.3193180  |
| 1  | -4.2781340 | -1.7780760 | 0.4841010  |

**C<sub>5</sub>H<sub>5</sub>N...BrOCHF<sub>2</sub>**

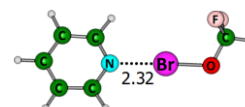

SCF E= -3136.1205  
 ZPE= -3136.0020  
 G= -3136.0422  
 H= -3135.9903

|    |            |            |            |
|----|------------|------------|------------|
| 35 | 0.6741600  | -0.4964670 | -0.1553410 |
| 8  | 2.5296950  | -0.8888200 | -0.2454250 |
| 6  | 3.3353700  | 0.1281970  | 0.0697380  |
| 1  | 4.3734240  | -0.1953090 | -0.0115930 |
| 9  | 3.1515080  | 1.2083030  | -0.7392130 |
| 9  | 3.1198300  | 0.5900210  | 1.3318110  |
| 6  | -4.3048980 | 0.4527010  | 0.1358620  |
| 6  | -3.3914660 | 1.4831380  | -0.0226300 |
| 6  | -2.0464680 | 1.1663300  | -0.1162500 |
| 7  | -1.6126050 | -0.0883930 | -0.0584460 |
| 6  | -2.4828970 | -1.0810770 | 0.0936710  |
| 6  | -3.8454390 | -0.8538250 | 0.1946210  |
| 1  | -5.3624110 | 0.6648690  | 0.2138180  |
| 1  | -3.7089000 | 2.5143560  | -0.0719710 |
| 1  | -1.2853780 | 1.9268560  | -0.2390770 |
| 1  | -2.0638020 | -2.0787410 | 0.1367670  |
| 1  | -4.5251220 | -1.6840680 | 0.3180410  |

**C<sub>5</sub>H<sub>5</sub>N...BrOCF<sub>2</sub>Cl**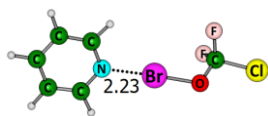

SCF E= -3595.7287  
 ZPE= -3595.6206  
 G= -3595.6626  
 H= -3595.6079

|    |            |            |            |
|----|------------|------------|------------|
| 35 | -0.0040670 | 0.3132750  | -0.3109880 |
| 8  | 1.8979870  | 0.5807260  | -0.5473020 |
| 6  | 2.6621210  | -0.1845900 | 0.2003210  |
| 9  | 2.4671170  | -0.0059020 | 1.5243210  |
| 9  | 2.4688240  | -1.5044480 | -0.0126530 |
| 17 | 4.3797700  | 0.1762090  | -0.1499450 |
| 6  | -4.9140900 | -0.2520880 | 0.2397290  |
| 6  | -4.3399510 | 1.0063580  | 0.3326300  |
| 6  | -2.9727260 | 1.1252950  | 0.1556320  |
| 7  | -2.2076610 | 0.0681130  | -0.0989590 |
| 6  | -2.7475750 | -1.1436640 | -0.1902230 |
| 6  | -4.1067800 | -1.3470180 | -0.0269290 |
| 1  | -5.9794490 | -0.3788950 | 0.3751690  |
| 1  | -4.9344460 | 1.8832100  | 0.5423350  |
| 1  | -2.4626300 | 2.0780300  | 0.2190750  |
| 1  | -2.0607830 | -1.9546240 | -0.3965100 |
| 1  | -4.5161810 | -2.3431120 | -0.1072640 |

**C<sub>5</sub>H<sub>5</sub>N...BrOCF<sub>3</sub>**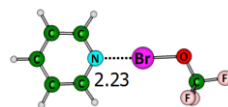

SCF E= -3235.3894  
 ZPE= -3235.2792  
 G= -3235.3199  
 H= -3235.2670

|    |           |           |           |
|----|-----------|-----------|-----------|
| 35 | -0.318196 | -0.476881 | -0.000040 |
| 8  | -2.200788 | -0.884359 | 0.000046  |
| 6  | -2.990063 | 0.173265  | -0.000035 |
| 9  | -2.820510 | 0.969224  | 1.074471  |
| 9  | -2.820515 | 0.969058  | -1.074664 |
| 9  | -4.266363 | -0.219084 | -0.000001 |
| 6  | 4.576491  | 0.424396  | 0.000251  |
| 6  | 4.107774  | -0.880330 | 0.000312  |
| 6  | 2.740064  | -1.092615 | 0.000131  |
| 7  | 1.876466  | -0.081987 | -0.000104 |
| 6  | 2.314976  | 1.173049  | -0.000178 |
| 6  | 3.666832  | 1.470383  | 0.000000  |
| 1  | 5.639251  | 0.623555  | 0.000401  |
| 1  | 4.783614  | -1.722621 | 0.000493  |
| 1  | 2.309485  | -2.085891 | 0.000176  |
| 1  | 1.553451  | 1.942721  | -0.000396 |
| 1  | 3.992171  | 2.500177  | -0.000056 |

**C<sub>5</sub>H<sub>5</sub>N...BrCNBeCl<sub>2</sub>**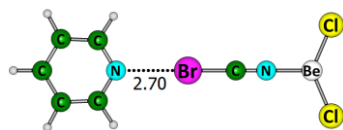

SCF E= -3850.6836  
 ZPE= -3850.5778  
 G= -3850.6247  
 H= -3850.5633

**C<sub>5</sub>H<sub>5</sub>N...BrC<sub>3</sub>N**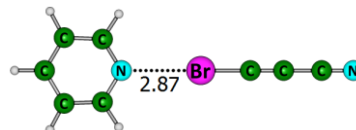

SCF E= -2991.4830  
 ZPE= -2991.3736  
 G= -2991.4145  
 H= -2991.3617



|    |            |            |            |    |            |            |            |
|----|------------|------------|------------|----|------------|------------|------------|
| 6  | 1.3226900  | 0.0000050  | -0.0000020 | 6  | -2.6315460 | -0.0001570 | 0.0001110  |
| 7  | 2.4650800  | 0.0000050  | 0.0000090  | 6  | -3.8329510 | 0.0001400  | 0.0003650  |
| 4  | 4.1800310  | 0.0000120  | 0.0000150  | 6  | -5.2089090 | 0.0003510  | 0.0000200  |
| 17 | 4.9063500  | -1.7202640 | 0.0002250  | 7  | -6.3589260 | 0.0007840  | -0.0003670 |
| 17 | 4.9064390  | 1.7202380  | -0.0001830 | 35 | -0.8408020 | -0.0004890 | 0.0000460  |
| 35 | -0.4755530 | 0.0000060  | -0.0000320 | 6  | 4.8011830  | 0.0009280  | 0.0000510  |
| 6  | -5.9447190 | -0.0000220 | 0.0000840  | 6  | 4.0963740  | -1.1921610 | -0.0000220 |
| 6  | -5.2403300 | -1.1934540 | -0.0002320 | 6  | 2.7105190  | -1.1403590 | -0.0000810 |
| 6  | -3.8554390 | -1.1428110 | -0.0003050 | 7  | 2.0242930  | -0.0004780 | -0.0001220 |
| 7  | -3.1726690 | 0.0000290  | -0.0000810 | 6  | 2.7093600  | 1.1400820  | -0.0000920 |
| 6  | -3.8554810 | 1.1428430  | 0.0002300  | 6  | 4.0951690  | 1.1932940  | -0.0000170 |
| 6  | -5.2403750 | 1.1934360  | 0.0003370  | 1  | 5.8827280  | 0.0014690  | 0.0000880  |
| 1  | -7.0261090 | -0.0000420 | 0.0001500  | 1  | 4.6048040  | -2.1454890 | -0.0000200 |
| 1  | -5.7482900 | -2.1467940 | -0.0004320 | 1  | 2.1236080  | -2.0515570 | -0.0001340 |
| 1  | -3.2676500 | -2.0532300 | -0.0005480 | 1  | 2.1215350  | 2.0506950  | -0.0001240 |
| 1  | -3.2677250 | 2.0532840  | 0.0003940  | 1  | 4.6026290  | 2.1471410  | -0.0000090 |
| 1  | -5.7483690 | 2.1467570  | 0.0006130  |    |            |            |            |

**C<sub>5</sub>H<sub>5</sub>N...BrC<sub>5</sub>N**

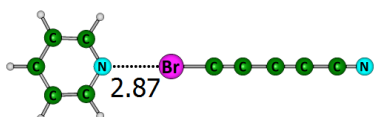

SCF E= -3067.6363  
 ZPE= -3067.5164  
 G= -3067.5606  
 H= -3067.5026

|    |            |            |            |
|----|------------|------------|------------|
| 6  | -2.9335440 | 0.0000900  | 0.0002430  |
| 6  | -1.7283070 | 0.0001590  | -0.0001620 |
| 6  | -4.2970210 | -0.0000360 | -0.0003340 |
| 6  | -5.5024130 | -0.0001690 | -0.0001700 |
| 6  | -6.8753660 | -0.0002740 | -0.0001450 |
| 7  | -8.0260950 | -0.0003180 | 0.0008170  |
| 35 | 0.0608200  | 0.0003230  | -0.0001870 |
| 6  | 5.7082890  | -0.0008020 | 0.0004030  |
| 6  | 5.0022450  | -1.1931390 | 0.0002440  |
| 6  | 3.6164380  | -1.1399630 | -0.0000550 |
| 7  | 2.9310730  | 0.0004430  | -0.0002100 |

**C<sub>5</sub>H<sub>5</sub>N...ClCF<sub>3</sub>**

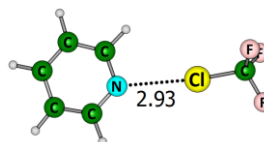

SCF E= -1046.1459  
 ZPE= -1046.0405  
 G= -1046.0832  
 H= -1046.0288

|    |            |            |            |
|----|------------|------------|------------|
| 6  | -2.9369320 | -0.0307510 | 0.0000120  |
| 9  | -3.3204330 | -0.7075410 | -1.0735290 |
| 9  | -3.3201330 | -0.7074730 | 1.0736790  |
| 9  | -3.5669250 | 1.1358600  | 0.0000410  |
| 17 | -1.2011720 | 0.2054810  | -0.0002600 |
| 6  | 4.4269010  | -0.3511080 | -0.0002280 |
| 6  | 4.0292670  | 0.9761040  | -0.0001250 |
| 6  | 2.6708570  | 1.2592890  | 0.0001790  |
| 7  | 1.7280950  | 0.3208120  | 0.0003520  |
| 6  | 2.1213830  | -0.9500550 | 0.0002510  |
| 6  | 3.4537060  | -1.3369820 | -0.0000370 |

|   |           |            |            |   |           |            |            |
|---|-----------|------------|------------|---|-----------|------------|------------|
| 6 | 3.6174290 | 1.1402470  | -0.0000370 | 1 | 5.4767250 | -0.6120990 | -0.0004330 |
| 6 | 5.0032940 | 1.1921650  | 0.0002250  | 1 | 4.7516940 | 1.7797450  | -0.0002770 |
| 1 | 6.7898230 | -0.0012410 | 0.0006260  | 1 | 2.3239590 | 2.2859160  | 0.0003270  |
| 1 | 5.5095370 | -2.1470760 | 0.0003830  | 1 | 1.3317690 | -1.6935430 | 0.0004180  |
| 1 | 3.0287670 | -2.0506790 | -0.0001920 | 1 | 3.7154230 | -2.3854900 | -0.0000920 |
| 1 | 3.0306030 | 2.0515020  | -0.0001070 |   |           |            |            |
| 1 | 5.5114660 | 2.1456320  | 0.0003110  |   |           |            |            |

**C<sub>5</sub>H<sub>5</sub>N...ClCCH**

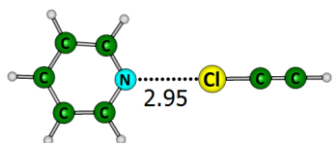

SCF E= -785.1964  
 ZPE= -785.0866  
 G= -785.1256  
 H= -785.0763

|    |            |            |            |
|----|------------|------------|------------|
| 6  | -3.7574100 | -0.0040570 | 0.0000170  |
| 6  | -4.9530870 | -0.0182730 | -0.0000150 |
| 1  | -6.0144160 | -0.0305880 | -0.0000450 |
| 17 | -2.1140330 | 0.0165330  | 0.0000650  |
| 6  | 3.6173150  | -0.0388250 | 0.0001050  |
| 6  | 2.9425820  | 1.1713300  | 0.0000330  |
| 6  | 1.5550800  | 1.1540360  | -0.0000850 |
| 7  | 0.8373790  | 0.0340840  | -0.0001550 |
| 6  | 1.4952720  | -1.1218440 | -0.0000940 |
| 6  | 2.8797870  | -1.2119120 | 0.0000310  |
| 1  | 4.6986020  | -0.0673870 | 0.0001970  |
| 1  | 3.4748820  | 2.1117120  | 0.0000760  |
| 1  | 0.9931920  | 2.0809150  | -0.0001400 |
| 1  | 0.8854500  | -2.0180290 | -0.0001450 |
| 1  | 3.3619560  | -2.1789990 | 0.0000740  |

**C<sub>5</sub>H<sub>5</sub>N...ClF**

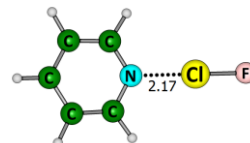

SCF E= -808.2557  
 ZPE= -808.1622  
 G= -808.1952  
 H= -808.1539

|    |            |            |            |
|----|------------|------------|------------|
| 9  | -3.6726170 | -0.0002680 | -0.0002430 |
| 17 | -1.9710200 | 0.0002240  | 0.0000370  |
| 6  | 2.9508970  | -0.0005630 | -0.0002170 |
| 6  | 2.2498690  | 1.1954390  | -0.0000900 |
| 6  | 0.8654430  | 1.1504350  | 0.0001790  |
| 7  | 0.2020220  | 0.0005100  | 0.0002940  |
| 6  | 0.8645530  | -1.1499480 | 0.0001790  |
| 6  | 2.2489310  | -1.1960270 | -0.0000870 |
| 1  | 4.0322200  | -0.0009800 | -0.0004600 |
| 1  | 2.7603510  | 2.1472510  | -0.0002040 |
| 1  | 0.2594700  | 2.0477340  | 0.0002920  |
| 1  | 0.2578660  | -2.0467640 | 0.0002810  |
| 1  | 2.7586800  | -2.1482330 | -0.0002000 |

**C<sub>5</sub>H<sub>5</sub>N...ClCN**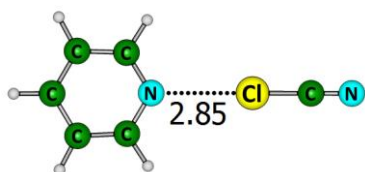

SCF E= -801.2960

ZPE= -801.1967

G= -801.2350

H= -801.1868

|    |            |            |            |
|----|------------|------------|------------|
| 6  | 3.7131880  | -0.0011860 | 0.0000440  |
| 7  | 4.8613500  | -0.0049040 | 0.0001150  |
| 17 | 2.0731030  | 0.0040280  | -0.0000630 |
| 6  | -3.5537070 | -0.0078790 | 0.0000730  |
| 6  | -2.8414100 | -1.1964180 | 0.0000370  |
| 6  | -1.4556730 | -1.1359680 | -0.0000450 |
| 7  | -0.7740780 | 0.0067500  | -0.0000770 |
| 6  | -1.4676770 | 1.1422660  | -0.0000340 |
| 6  | -2.8540140 | 1.1880930  | 0.0000340  |
| 1  | -4.6352610 | -0.0136120 | 0.0001390  |
| 1  | -3.3438040 | -2.1530110 | 0.0000770  |
| 1  | -0.8653680 | -2.0450280 | -0.0000600 |
| 1  | -0.8869970 | 2.0574730  | -0.0000610 |
| 1  | -3.3664690 | 2.1393250  | 0.0000660  |

**C<sub>5</sub>H<sub>5</sub>N...ClOH**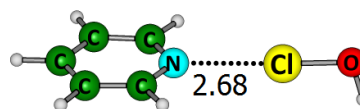

SCF E= -784.2407

ZPE= -784.1362

G= -784.1728

H= -784.1266

|    |            |            |            |
|----|------------|------------|------------|
| 8  | -3.9833940 | 0.0286080  | -0.0756550 |
| 17 | -2.2899440 | 0.0011620  | -0.0197070 |
| 1  | -4.2531360 | -0.2347020 | 0.8104300  |
| 6  | 3.1595580  | 0.0114560  | 0.0043830  |
| 6  | 2.4647310  | -1.1875370 | -0.0012040 |
| 6  | 1.0780040  | -1.1470290 | -0.0023300 |
| 7  | 0.3857790  | -0.0123680 | 0.0024130  |
| 6  | 1.0582740  | 1.1340980  | 0.0072520  |
| 6  | 2.4440800  | 1.1982870  | 0.0084090  |
| 1  | 4.2411570  | 0.0208220  | 0.0052140  |
| 1  | 2.9814590  | -2.1364890 | -0.0052370 |
| 1  | 0.4948420  | -2.0604470 | -0.0078950 |
| 1  | 0.4591280  | 2.0371350  | 0.0096900  |
| 1  | 2.9444150  | 2.1559940  | 0.0121030  |

**C<sub>5</sub>H<sub>5</sub>N...ClOF**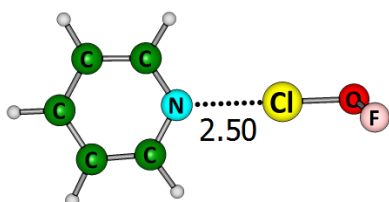

SCF E= -883.3666

ZPE= -883.2709

G= -883.3088

H= -883.2608

**C<sub>5</sub>H<sub>5</sub>N...ClC<sub>6</sub>H<sub>5</sub>**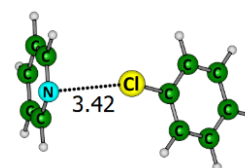

SCF E= -940.1030

ZPE= -939.9215

G= -939.9658

H= -939.9085

|    |            |            |            |
|----|------------|------------|------------|
| 8  | -3.3768560 | -0.1252570 | -0.4859190 |
| 9  | -3.9551330 | 0.2044900  | 0.7523130  |
| 17 | -1.7001580 | -0.0857200 | -0.2587180 |
| 6  | 3.5464210  | 0.0635300  | 0.1148630  |
| 6  | 2.8046280  | 1.2302190  | 0.0183000  |
| 6  | 1.4240140  | 1.1306640  | -0.0591000 |
| 7  | 0.7856660  | -0.0349480 | -0.0446200 |
| 6  | 1.4993110  | -1.1523210 | 0.0486080  |
| 6  | 2.8835040  | -1.1533440 | 0.1309240  |
| 1  | 4.6255550  | 0.1022840  | 0.1766630  |
| 1  | 3.2810070  | 2.1997510  | 0.0020810  |
| 1  | 0.8013600  | 2.0142790  | -0.1350420 |
| 1  | 0.9368140  | -2.0782990 | 0.0567320  |
| 1  | 3.4220760  | -2.0869690 | 0.2050790  |

|    |            |            |            |
|----|------------|------------|------------|
| 6  | 1.7581860  | -0.0974760 | -0.2931750 |
| 6  | 2.3283110  | 1.1635050  | -0.2220250 |
| 6  | 2.4931420  | -1.2357410 | -0.0024920 |
| 6  | 3.6598480  | 1.2819230  | 0.1488070  |
| 1  | 1.7340140  | 2.0345320  | -0.4578630 |
| 6  | 3.8239050  | -1.1030390 | 0.3668030  |
| 1  | 2.0253910  | -2.2074830 | -0.0688850 |
| 6  | 4.4101930  | 0.1522950  | 0.4434490  |
| 1  | 4.1101480  | 2.2634560  | 0.2066670  |
| 1  | 4.4022820  | -1.9877550 | 0.5954410  |
| 1  | 5.4474340  | 0.2498920  | 0.7315930  |
| 17 | 0.0902690  | -0.2507630 | -0.7589250 |
| 6  | -2.9669090 | -0.2913100 | 1.5413180  |
| 6  | -3.1859620 | -1.2485540 | 0.5644830  |
| 6  | -3.3115930 | -0.8322200 | -0.7534000 |
| 7  | -3.2332270 | 0.4405540  | -1.1332580 |
| 6  | -3.0204810 | 1.3494850  | -0.1852790 |
| 6  | -2.8821400 | 1.0375770  | 1.1599950  |
| 1  | -2.8607270 | -0.5760200 | 2.5794930  |
| 1  | -3.2543250 | -2.2985020 | 0.8112610  |
| 1  | -3.4801280 | -1.5567760 | -1.5417480 |
| 1  | -2.9555940 | 2.3791060  | -0.5176380 |
| 1  | -2.7094780 | 1.8199660  | 1.8853040  |

**C<sub>5</sub>H<sub>5</sub>N...ClC<sub>6</sub>H<sub>4</sub>F**

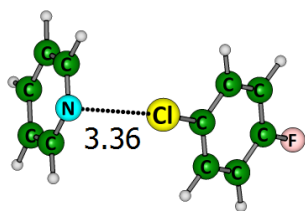

SCF E= -1039.3541  
 ZPE= -1039.1805  
 G= -1039.2247  
 H= -1039.16680

|   |           |            |            |
|---|-----------|------------|------------|
| 6 | 1.3099560 | -0.1226780 | -0.4233630 |
| 6 | 1.9101470 | 1.1259630  | -0.3866750 |

**C<sub>5</sub>H<sub>5</sub>N...ClC<sub>6</sub>H<sub>4</sub>Cl**

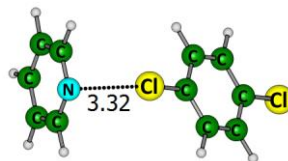

SCF E= -1399.7130  
 ZPE= -1399.5411  
 G= -1399.5870  
 H= -1399.5269

|   |            |            |            |
|---|------------|------------|------------|
| 6 | -0.8864660 | -0.1908110 | -0.4482310 |
| 6 | -1.6250410 | -1.3163210 | -0.1185800 |

|    |            |            |            |    |            |            |            |
|----|------------|------------|------------|----|------------|------------|------------|
| 6  | 2.0273940  | -1.2686180 | -0.1176020 | 6  | -1.4827740 | 1.0586100  | -0.5076480 |
| 6  | 3.2479650  | 1.2335090  | -0.0384900 | 6  | -2.9777100 | -1.1906780 | 0.1567470  |
| 1  | 1.3337250  | 2.0061210  | -0.6317010 | 1  | -1.1438460 | -2.2827800 | -0.0779950 |
| 6  | 3.3655410  | -1.1661280 | 0.2312100  | 6  | -2.8355200 | 1.1852040  | -0.2326520 |
| 1  | 1.5411210  | -2.2325220 | -0.1551880 | 1  | -0.8924990 | 1.9248350  | -0.7692750 |
| 6  | 3.9502520  | 0.0839550  | 0.2639710  | 6  | -3.5716460 | 0.0593630  | 0.0982890  |
| 1  | 3.7470360  | 2.1910060  | 0.0000310  | 1  | -3.5688620 | -2.0570540 | 0.4159730  |
| 1  | 3.9538360  | -2.0387760 | 0.4758040  | 1  | -3.3175100 | 2.1510700  | -0.2761800 |
| 9  | 5.2454150  | 0.1850050  | 0.6009240  | 17 | -5.2665610 | 0.2177790  | 0.4452470  |
| 17 | -0.3659670 | -0.2510990 | -0.8608090 | 17 | 0.8069860  | -0.3505230 | -0.7899620 |
| 6  | -3.2624680 | 0.2101130  | 1.6456540  | 6  | 3.7579760  | 0.9195380  | 1.4106530  |
| 6  | -3.4335460 | -1.0400490 | 1.0744080  | 6  | 3.9428180  | 1.4736550  | 0.1544770  |
| 6  | -3.6557500 | -1.1172170 | -0.2933400 | 6  | 4.1101730  | 0.6200300  | -0.9268530 |
| 7  | -3.7155810 | -0.0533320 | -1.0902570 | 7  | 4.1032690  | -0.7065570 | -0.8244610 |
| 6  | -3.5515460 | 1.1417060  | -0.5283600 | 6  | 3.9268990  | -1.2256120 | 0.3880060  |
| 6  | -3.3232260 | 1.3266630  | 0.8278580  | 6  | 3.7506530  | -0.4603160 | 1.5320960  |
| 1  | -3.0837120 | 0.3126660  | 2.7076120  | 1  | 3.6204890  | 1.5512900  | 2.2779740  |
| 1  | -3.3938070 | -1.9409810 | 1.6700060  | 1  | 3.9545990  | 2.5443480  | 0.0081500  |
| 1  | -3.7893690 | -2.0804500 | -0.7721470 | 1  | 4.2520940  | 1.0216100  | -1.9235430 |
| 1  | -3.6008390 | 1.9939640  | -1.1961620 | 1  | 3.9217060  | -2.3077430 | 0.4479880  |
| 1  | -3.1945470 | 2.3226190  | 1.2273600  | 1  | 3.6075560  | -0.9390070 | 2.4904510  |

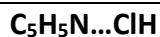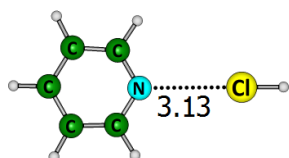

SCF E= -709.0743  
 ZPE= -708.9757  
 G= -709.0104  
 H= -708.9674

|    |            |            |            |
|----|------------|------------|------------|
| 17 | 3.1565420  | -0.0007510 | 0.0000190  |
| 1  | 4.4370750  | 0.0055860  | 0.0000560  |
| 6  | -2.7582090 | 0.0251690  | 0.0000390  |
| 6  | -2.0733790 | -1.1793280 | 0.0000170  |
| 6  | -0.6856680 | -1.1502260 | -0.0000340 |
| 7  | 0.0235460  | -0.0253940 | -0.0000600 |
| 6  | -0.6441880 | 1.1244310  | -0.0000360 |

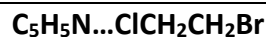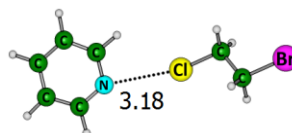

SCF E= -3361.3290  
 ZPE= -3361.1808  
 G= -3361.2247  
 H= -3361.1683

|   |           |            |            |
|---|-----------|------------|------------|
| 6 | 1.6530830 | -0.4747260 | 0.3872300  |
| 1 | 1.8892830 | -0.6994230 | 1.4226880  |
| 1 | 1.6954850 | -1.3853250 | -0.2021010 |
| 6 | 2.5695560 | 0.5845170  | -0.1701230 |
| 1 | 2.3414740 | 0.8094370  | -1.2061210 |
| 1 | 2.5441010 | 1.4917930  | 0.4232860  |

|                                                                                                                                                           |            |            |            |                                                                                                                                                                         |            |            |            |
|-----------------------------------------------------------------------------------------------------------------------------------------------------------|------------|------------|------------|-------------------------------------------------------------------------------------------------------------------------------------------------------------------------|------------|------------|------------|
| 6                                                                                                                                                         | -2.0298120 | 1.2039430  | 0.0000160  | 35                                                                                                                                                                      | 4.4081040  | -0.0632590 | -0.1277940 |
| 1                                                                                                                                                         | -3.8397550 | 0.0449780  | 0.0000810  | 17                                                                                                                                                                      | -0.0298460 | 0.1327500  | 0.3303340  |
| 1                                                                                                                                                         | -2.5981410 | -2.1240610 | 0.0000370  | 6                                                                                                                                                                       | -5.7284420 | -0.5476740 | -0.2221560 |
| 1                                                                                                                                                         | -0.1162700 | -2.0725810 | -0.0000540 | 6                                                                                                                                                                       | -5.5366540 | 0.8228830  | -0.1545030 |
| 1                                                                                                                                                         | -0.0415520 | 2.0254890  | -0.0000570 | 6                                                                                                                                                                       | -4.2434900 | 1.3025120  | 0.0015820  |
| 1                                                                                                                                                         | -2.5198480 | 2.1671780  | 0.0000360  | 7                                                                                                                                                                       | -3.1742210 | 0.5161140  | 0.0886500  |
|                                                                                                                                                           |            |            |            | 6                                                                                                                                                                       | -3.3707870 | -0.7975380 | 0.0215830  |
|                                                                                                                                                           |            |            |            | 6                                                                                                                                                                       | -4.6226980 | -1.3773060 | -0.1318760 |
|                                                                                                                                                           |            |            |            | 1                                                                                                                                                                       | -6.7206580 | -0.9614800 | -0.3431500 |
|                                                                                                                                                           |            |            |            | 1                                                                                                                                                                       | -6.3673170 | 1.5111190  | -0.2204580 |
|                                                                                                                                                           |            |            |            | 1                                                                                                                                                                       | -4.0585420 | 2.3689460  | 0.0586960  |
|                                                                                                                                                           |            |            |            | 1                                                                                                                                                                       | -2.4819060 | -1.4140770 | 0.0926620  |
|                                                                                                                                                           |            |            |            | 1                                                                                                                                                                       | -4.7220240 | -2.4524730 | -0.1793840 |
| <b>C<sub>5</sub>H<sub>5</sub>N...ClC<sub>6</sub>H<sub>4</sub>Br</b><br>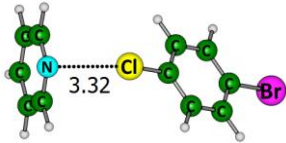 |            |            |            | <b>C<sub>5</sub>H<sub>5</sub>N...ClC<sub>6</sub>H<sub>4</sub>NO<sub>2</sub></b><br> |            |            |            |
| SCF E= -3513.7466<br>ZPE= -3513.5751<br>G= -3513.6225<br>H= -3513.5607                                                                                    |            |            |            | SCF E= -1144.6156<br>ZPE= -1144.4312<br>G= -1144.4791<br>H= -1144.4158                                                                                                  |            |            |            |
| 6                                                                                                                                                         | -0.1242020 | -0.2300980 | -0.5098570 | 6                                                                                                                                                                       | 0.5925360  | -0.1544750 | -0.5223070 |
| 6                                                                                                                                                         | -0.8535070 | -1.3566710 | -0.1641950 | 6                                                                                                                                                                       | 1.2075900  | 1.0898810  | -0.5023630 |
| 6                                                                                                                                                         | -0.7371640 | 1.0076960  | -0.6205400 | 6                                                                                                                                                                       | 1.3056480  | -1.3180500 | -0.2671520 |
| 6                                                                                                                                                         | -2.2145930 | -1.2441980 | 0.0742050  | 6                                                                                                                                                                       | 2.5595600  | 1.1743940  | -0.2205070 |
| 1                                                                                                                                                         | -0.3594550 | -2.3141010 | -0.0827630 | 1                                                                                                                                                                       | 0.6294130  | 1.9782870  | -0.7089080 |
| 6                                                                                                                                                         | -2.0986500 | 1.1217450  | -0.3824010 | 6                                                                                                                                                                       | 2.6579720  | -1.2366500 | 0.0147070  |
| 1                                                                                                                                                         | -0.1532980 | 1.8750480  | -0.8928750 | 1                                                                                                                                                                       | 0.8019030  | -2.2729320 | -0.2918350 |
| 6                                                                                                                                                         | -2.8260180 | -0.0058170 | -0.0369790 | 6                                                                                                                                                                       | 3.2593770  | 0.0085820  | 0.0335410  |
| 1                                                                                                                                                         | -2.7949770 | -2.1143280 | 0.3442110  | 1                                                                                                                                                                       | 3.0730670  | 2.1233090  | -0.1955950 |
| 1                                                                                                                                                         | -2.5881990 | 2.0811460  | -0.4670470 | 1                                                                                                                                                                       | 3.2462830  | -2.1180210 | 0.2193770  |
| 35                                                                                                                                                        | -4.6849030 | 0.1442860  | 0.2871510  | 17                                                                                                                                                                      | -1.0979980 | -0.2520970 | -0.8721780 |
| 17                                                                                                                                                        | 1.5787190  | -0.3754710 | -0.8075250 | 6                                                                                                                                                                       | -3.9974030 | -0.2791940 | 1.6665100  |
| 6                                                                                                                                                         | 4.4680880  | 0.9759610  | 1.4251240  |                                                                                                                                                                         |            |            |            |

|                                                                                    |            |            |            |                                                                                     |            |            |            |
|------------------------------------------------------------------------------------|------------|------------|------------|-------------------------------------------------------------------------------------|------------|------------|------------|
| 6                                                                                  | 4.6805790  | 1.4967270  | 0.1590400  | 6                                                                                   | -4.2876680 | -1.2146410 | 0.6870200  |
| 6                                                                                  | 4.8786460  | 0.6149190  | -0.8942080 | 6                                                                                   | -4.4584830 | -0.7744890 | -0.6181840 |
| 7                                                                                  | 4.8765940  | -0.7083890 | -0.7556040 | 7                                                                                   | -4.3580980 | 0.5012400  | -0.9830060 |
| 6                                                                                  | 4.6741820  | -1.1951490 | 0.4659830  | 6                                                                                   | -4.0796570 | 1.3895390  | -0.0323820 |
| 6                                                                                  | 4.4656200  | -0.4001630 | 1.5840600  | 6                                                                                   | -3.8912550 | 1.0528570  | 1.3007390  |
| 1                                                                                  | 4.3056280  | 1.6306750  | 2.2707710  | 1                                                                                   | -3.8558980 | -0.5826940 | 2.6951230  |
| 1                                                                                  | 4.6902810  | 2.5630910  | -0.0161270 | 1                                                                                   | -4.3792320 | -2.2654870 | 0.9221390  |
| 1                                                                                  | 5.0425400  | 0.9897480  | -1.8979360 | 1                                                                                   | -4.6840360 | -1.4808140 | -1.4089040 |
| 1                                                                                  | 4.6739070  | -2.2752550 | 0.5558830  | 1                                                                                   | -4.0019840 | 2.4222620  | -0.3521950 |
| 1                                                                                  | 4.3029030  | -0.8539910 | 2.5513680  | 1                                                                                   | -3.6677400 | 1.8192620  | 2.0292910  |
|                                                                                    |            |            |            | 7                                                                                   | 4.6983990  | 0.0956690  | 0.3357260  |
|                                                                                    |            |            |            | 8                                                                                   | 5.2016560  | 1.1966710  | 0.3477990  |
|                                                                                    |            |            |            | 8                                                                                   | 5.2874410  | -0.9394720 | 0.5536740  |
| <b>C<sub>5</sub>H<sub>5</sub>N...ClOBr</b>                                         |            |            |            | <b>C<sub>5</sub>H<sub>5</sub>N...ClOCH<sub>2</sub>F</b>                             |            |            |            |
| 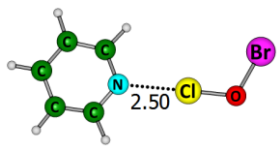 |            |            |            |  |            |            |            |
| SCF E= -3357.8299                                                                  |            |            |            | SCF E= -922.7965                                                                    |            |            |            |
| ZPE= -3357.7355                                                                    |            |            |            | ZPE= -922.6702                                                                      |            |            |            |
| G= -3357.7745                                                                      |            |            |            | G= -922.7110                                                                        |            |            |            |
| H= -3357.7251                                                                      |            |            |            | H= -922.6589                                                                        |            |            |            |
| 8                                                                                  | -2.1724380 | -1.0808930 | 0.0000040  | 8                                                                                   | 3.0128520  | -0.7445680 | -0.4186620 |
| 35                                                                                 | -3.2103620 | 0.4109260  | -0.0000110 | 6                                                                                   | 3.6733230  | 0.0171870  | 0.5178050  |
| 17                                                                                 | -0.5011290 | -0.7245020 | 0.0000660  | 1                                                                                   | 3.2499020  | -0.1043730 | 1.5159110  |
| 6                                                                                  | 4.6084580  | 0.5385060  | 0.0000390  | 1                                                                                   | 4.7177430  | -0.2893420 | 0.4639890  |
| 6                                                                                  | 4.2644830  | -0.8039500 | -0.0000140 | 9                                                                                   | 3.6027850  | 1.3528180  | 0.2052500  |
| 6                                                                                  | 2.9195000  | -1.1416670 | -0.0000480 | 17                                                                                  | 1.3229790  | -0.5918850 | -0.2785380 |
| 7                                                                                  | 1.9506750  | -0.2322610 | -0.0000820 | 6                                                                                   | -3.9179310 | 0.4491390  | 0.1351330  |
| 6                                                                                  | 2.2834330  | 1.0544570  | -0.0000470 | 6                                                                                   | -3.5233370 | -0.8696100 | 0.2946660  |
| 6                                                                                  | 3.6000530  | 1.4889320  | 0.0000380  | 6                                                                                   | -2.1754710 | -1.1747880 | 0.1764640  |
| 1                                                                                  | 5.6472970  | 0.8399640  | 0.0000870  | 7                                                                                   | -1.2468120 | -0.2591870 | -0.0822190 |
| 1                                                                                  | 5.0187050  | -1.5775480 | -0.0000410 | 6                                                                                   | -1.6311590 | 1.0043850  | -0.2344420 |
| 1                                                                                  | 2.6028800  | -2.1778270 | -0.0000420 | 6                                                                                   | -2.9544580 | 1.4073480  | -0.1352940 |
| 1                                                                                  | 1.4595010  | 1.7586900  | -0.0001050 | 1                                                                                   | -4.9603380 | 0.7254170  | 0.2195540  |
| 1                                                                                  | 3.8227030  | 2.5461450  | 0.0001040  | 1                                                                                   | -4.2410100 | -1.6495790 | 0.5047650  |

|   |            |            |            |
|---|------------|------------|------------|
| 1 | -1.8230550 | -2.1927270 | 0.2931910  |
| 1 | -0.8432330 | 1.7191040  | -0.4426570 |
| 1 | -3.2166470 | 2.4470680  | -0.2680240 |

**C<sub>5</sub>H<sub>5</sub>N...ClOCHF<sub>2</sub>**

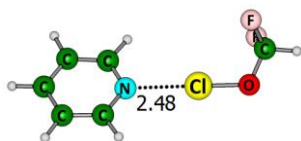

SCF E= -1022.0643  
 ZPE= -1021.9456  
 G= -1021.9863  
 H= -1021.9339

|    |            |            |            |
|----|------------|------------|------------|
| 8  | 2.6298250  | -0.9970880 | -0.3174530 |
| 6  | 3.4045680  | 0.0527950  | 0.0411400  |
| 1  | 4.4426820  | -0.2644150 | -0.0513030 |
| 9  | 3.1902570  | 1.1334110  | -0.7403600 |
| 9  | 3.1640500  | 0.4541840  | 1.3074870  |
| 17 | 0.9454830  | -0.6629940 | -0.2150680 |
| 6  | -4.1658400 | 0.4421550  | 0.1093300  |
| 6  | -3.2058060 | 1.4326110  | -0.0237850 |
| 6  | -1.8745570 | 1.0553100  | -0.1098950 |
| 7  | -1.4843450 | -0.2144490 | -0.0688720 |
| 6  | -2.4064060 | -1.1629260 | 0.0600160  |
| 6  | -3.7612950 | -0.8825800 | 0.1526440  |
| 1  | -5.2143140 | 0.6986690  | 0.1787100  |
| 1  | -3.4771390 | 2.4777560  | -0.0608850 |
| 1  | -1.0873140 | 1.7923790  | -0.2158150 |
| 1  | -2.0414650 | -2.1826410 | 0.0898620  |
| 1  | -4.4766010 | -1.6855490 | 0.2564740  |

**C<sub>5</sub>H<sub>5</sub>N...ClOCF<sub>2</sub>Cl**

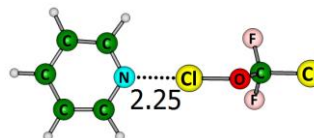

SCF E= -1481.6699  
 ZPE= -1481.5619  
 G= -1481.6049  
 H= -1481.5492

|    |            |            |            |
|----|------------|------------|------------|
| 8  | -1.8293980 | -0.2951670 | -0.8346320 |
| 6  | -2.5731710 | 0.0619310  | 0.2132310  |
| 9  | -2.3690310 | -0.7159210 | 1.2882880  |
| 9  | -2.3344400 | 1.3198760  | 0.6184960  |
| 17 | -4.2809400 | -0.0653820 | -0.2623390 |
| 17 | -0.0933210 | -0.1997070 | -0.5029550 |
| 6  | 4.8421240  | 0.1264790  | 0.2315360  |
| 6  | 4.0739220  | 1.2644210  | 0.0414310  |
| 6  | 2.7116150  | 1.1157430  | -0.1602460 |
| 7  | 2.1285710  | -0.0772800 | -0.1753650 |
| 6  | 2.8580090  | -1.1718240 | 0.0067940  |
| 6  | 4.2266560  | -1.1153270 | 0.2146830  |
| 1  | 5.9087070  | 0.2067350  | 0.3914070  |
| 1  | 4.5160350  | 2.2498840  | 0.0483660  |
| 1  | 2.0583590  | 1.9658370  | -0.3144470 |
| 1  | 2.3211580  | -2.1121560 | -0.0160300 |
| 1  | 4.7896770  | -2.0256200 | 0.3596830  |



**C<sub>5</sub>H<sub>5</sub>N...ClOCF<sub>3</sub>**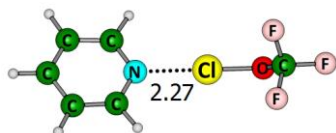

SCF E= -1121.3306

ZPE= -1121.2203

G= -1121.2613

H= -1121.2081

|    |            |            |            |
|----|------------|------------|------------|
| 8  | -2.1922990 | -0.5265300 | -0.8092810 |
| 6  | -2.9473310 | 0.0589060  | 0.1272410  |
| 9  | -2.7195110 | -0.4144290 | 1.3583260  |
| 9  | -2.7714360 | 1.3849750  | 0.1892710  |
| 9  | -4.2223670 | -0.1703300 | -0.1701670 |
| 17 | -0.4746470 | -0.3219800 | -0.5190240 |
| 6  | 4.4504340  | 0.1944160  | 0.2893520  |
| 6  | 3.6567390  | 1.3055150  | 0.0513000  |
| 6  | 2.3051810  | 1.1137640  | -0.1855270 |
| 7  | 1.7550770  | -0.0950810 | -0.1916040 |
| 6  | 2.5103960  | -1.1634710 | 0.0359210  |
| 6  | 3.8700970  | -1.0642570 | 0.2822700  |
| 1  | 5.5089700  | 0.3086790  | 0.4792630  |
| 1  | 4.0707360  | 2.3031240  | 0.0489450  |
| 1  | 1.6342180  | 1.9425540  | -0.3756270 |
| 1  | 2.0013230  | -2.1194320 | 0.0199690  |
| 1  | 4.4533390  | -1.9546300 | 0.4661140  |

**C<sub>5</sub>H<sub>5</sub>N...ClCNBeCl<sub>2</sub>**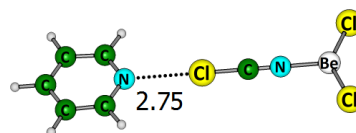

SCF E= -1736.6430

ZPE= -1736.5367

G= -1736.5833

H= -1736.5224

|    |            |            |            |
|----|------------|------------|------------|
| 6  | -1.1724550 | -0.0034550 | -0.0000010 |
| 7  | -2.3142610 | -0.0016520 | -0.0001010 |
| 4  | -4.0344370 | 0.0011340  | -0.0000280 |
| 17 | -4.7542400 | -1.7199830 | -0.0001570 |
| 17 | -4.7487170 | 1.7245820  | 0.0001600  |
| 17 | 0.4514660  | -0.0058920 | 0.0000300  |
| 6  | 5.9740290  | 0.0072640  | -0.0000970 |
| 6  | 5.2739240  | -1.1884930 | 0.0001720  |
| 6  | 3.8883400  | -1.1425730 | 0.0002740  |
| 7  | 3.1964910  | -0.0050290 | 0.0001010  |
| 6  | 3.8782460  | 1.1385580  | -0.0001650 |
| 6  | 5.2633300  | 1.1967810  | -0.0002500 |
| 1  | 7.0554570  | 0.0120820  | -0.0001450 |
| 1  | 5.7855680  | -2.1399730 | 0.0003040  |
| 1  | 3.3077920  | -2.0577480 | 0.0005170  |
| 1  | 3.2896350  | 2.0485990  | -0.0002990 |
| 1  | 5.7665290  | 2.1527650  | -0.0004190 |

**C<sub>5</sub>H<sub>5</sub>N...ClC<sub>3</sub>N**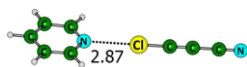

SCF E= -877.4449

ZPE= -877.3352

G= -877.3763

H= -877.3233

|   |           |           |            |
|---|-----------|-----------|------------|
| 6 | 2.7030080 | 0.0147270 | -0.0001470 |
| 6 | 3.9028170 | 0.0005450 | -0.0001790 |

**C<sub>5</sub>H<sub>5</sub>N...ClC<sub>5</sub>N**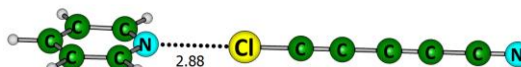

SCF E= -953.5982

ZPE= -953.4779

G= -953.5219

H= -953.4641

|   |            |            |            |
|---|------------|------------|------------|
| 6 | -2.8265470 | -0.0051120 | -0.0000320 |
|---|------------|------------|------------|

|    |            |            |            |    |            |            |            |
|----|------------|------------|------------|----|------------|------------|------------|
| 6  | 5.2782870  | -0.0171320 | -0.0001780 | 6  | -1.6229360 | -0.0095500 | 0.0000360  |
| 7  | 6.4280500  | -0.0324820 | 0.0001300  | 6  | -4.1899570 | -0.0004590 | -0.0000890 |
| 17 | 1.0723500  | 0.0352740  | -0.0000040 | 6  | -5.3950990 | 0.0035320  | -0.0001430 |
| 6  | -4.5764640 | -0.0548090 | -0.0003190 | 6  | -6.7681830 | 0.0079320  | -0.0001780 |
| 6  | -3.8305150 | -1.2225690 | -0.0001220 | 7  | -7.9188100 | 0.0117780  | 0.0000810  |
| 6  | -2.4471310 | -1.1226770 | 0.0002570  | 17 | 0.0071710  | -0.0161980 | 0.0001370  |
| 7  | -1.7977120 | 0.0386450  | 0.0004390  | 6  | 5.6626840  | 0.0255780  | -0.0003100 |
| 6  | -2.5237620 | 1.1539060  | 0.0002410  | 6  | 4.9744720  | -1.1769910 | -0.0001620 |
| 6  | -3.9109440 | 1.1604280  | -0.0001430 | 6  | 3.5876600  | -1.1443390 | 0.0001390  |
| 1  | -5.6574400 | -0.0914040 | -0.0006220 | 7  | 2.8827140  | -0.0158110 | 0.0003000  |
| 1  | -4.3053910 | -2.1931550 | -0.0002660 | 6  | 3.5536990  | 1.1331300  | 0.0001520  |
| 1  | -1.8315410 | -2.0149240 | 0.0004210  | 6  | 4.9388140  | 1.2071230  | -0.0001540 |
| 1  | -1.9695950 | 2.0853870  | 0.0003990  | 1  | 6.7441400  | 0.0417990  | -0.0005490 |
| 1  | -4.4501250 | 2.0967670  | -0.0003090 | 1  | 5.4960800  | -2.1232440 | -0.0002780 |
|    |            |            |            | 1  | 3.0160240  | -2.0652370 | 0.0002670  |
|    |            |            |            | 1  | 2.9548940  | 2.0366700  | 0.0002800  |
|    |            |            |            | 1  | 5.4319720  | 2.1685370  | -0.0002650 |

**C<sub>5</sub>H<sub>5</sub>N...FCN**

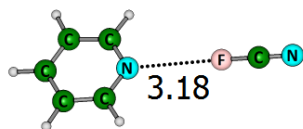

SCF E= -440.9166  
 ZPE= -440.8162  
 G= -440.8557  
 H= -440.8062

|   |            |            |            |
|---|------------|------------|------------|
| 9 | 2.6296370  | -0.0108330 | -0.0011060 |
| 6 | 3.8895990  | 0.0001290  | -0.0003340 |
| 7 | 5.0350810  | 0.0100960  | 0.0002940  |
| 6 | -3.3329980 | -0.0564140 | -0.0009730 |
| 6 | -2.5767260 | -1.2173440 | -0.0003010 |
| 6 | -1.1936340 | -1.1053750 | 0.0009110  |
| 7 | -0.5499630 | 0.0590320  | 0.0014740  |
| 6 | -1.2880110 | 1.1662770  | 0.0008190  |
| 6 | -2.6758870 | 1.1631670  | -0.0003970 |
| 1 | -4.4137330 | -0.1015820 | -0.0019180 |

**C<sub>5</sub>H<sub>5</sub>N...FCNBeCl<sub>2</sub>**

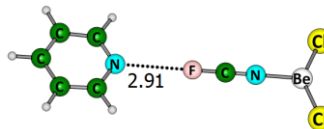

SCF E= -1376.2582  
 ZPE= -1376.1507  
 G= -1376.1993  
 H= -1376.1363

|    |            |            |            |
|----|------------|------------|------------|
| 6  | -1.0162200 | -0.0004760 | 0.0002620  |
| 7  | -2.1533000 | -0.0003160 | 0.0000940  |
| 4  | -3.8944170 | 0.0001300  | -0.0000420 |
| 17 | -4.5861680 | 1.7273930  | -0.0000770 |
| 17 | -4.5867270 | -1.7269530 | -0.0001510 |
| 9  | 0.2248150  | -0.0006610 | 0.0003850  |
| 6  | 5.9150590  | 0.0000240  | -0.0002890 |
| 6  | 5.2080150  | 1.1914650  | -0.0002090 |
| 6  | 3.8218110  | 1.1374220  | 0.0000450  |
| 7  | 3.1298610  | 0.0001070  | 0.0002150  |
| 6  | 3.8217380  | -1.1372210 | 0.0001340  |

|                                                                                                                                           |            |            |            |                                                                                                                                            |            |            |            |
|-------------------------------------------------------------------------------------------------------------------------------------------|------------|------------|------------|--------------------------------------------------------------------------------------------------------------------------------------------|------------|------------|------------|
| 1                                                                                                                                         | -3.0432920 | -2.1921310 | -0.0007250 | 6                                                                                                                                          | 5.2079630  | -1.1913600 | -0.0001080 |
| 1                                                                                                                                         | -0.5739620 | -1.9946700 | 0.0014500  | 1                                                                                                                                          | 6.9965940  | 0.0000110  | -0.0004730 |
| 1                                                                                                                                         | -0.7438190 | 2.1035760  | 0.0013060  | 1                                                                                                                                          | 5.7146230  | 2.1458830  | -0.0003360 |
| 1                                                                                                                                         | -3.2218090 | 2.0957730  | -0.0008720 | 1                                                                                                                                          | 3.2409170  | 2.0524260  | 0.0000800  |
|                                                                                                                                           |            |            |            | 1                                                                                                                                          | 3.2408040  | -2.0522030 | 0.0003140  |
|                                                                                                                                           |            |            |            | 1                                                                                                                                          | 5.7144850  | -2.1458230 | -0.0001680 |
| <b>C<sub>5</sub>H<sub>5</sub>N...FC<sub>3</sub>N</b><br>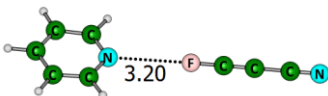 |            |            |            | <b>C<sub>5</sub>H<sub>5</sub>N...FC<sub>5</sub>N</b><br> |            |            |            |
| SCF E= -517.0644<br>ZPE= -516.9535<br>G= -516.9962<br>H= -516.9417                                                                        |            |            |            | SCF E= -593.2169<br>ZPE= -593.0957<br>G= -593.1422<br>H= -593.0818                                                                         |            |            |            |
| 6                                                                                                                                         | 2.7544030  | 0.0147470  | 0.0000050  | 6                                                                                                                                          | -2.7671960 | -0.0071640 | 0.0066870  |
| 6                                                                                                                                         | 3.9463000  | 0.0040410  | -0.0000330 | 6                                                                                                                                          | -1.5719990 | -0.0106990 | 0.0100470  |
| 6                                                                                                                                         | 5.3237800  | -0.0089630 | 0.0000170  | 9                                                                                                                                          | -0.3101890 | -0.0145450 | 0.0135610  |
| 7                                                                                                                                         | 6.4724690  | -0.0199850 | 0.0001400  | 6                                                                                                                                          | -4.1342760 | -0.0026380 | 0.0025940  |
| 9                                                                                                                                         | 1.4939640  | 0.0261360  | 0.0000140  | 6                                                                                                                                          | -5.3376290 | 0.0015150  | -0.0011610 |
| 6                                                                                                                                         | -4.4923650 | 0.0181920  | 0.0002440  | 6                                                                                                                                          | -6.7117140 | 0.0063940  | -0.0056360 |
| 6                                                                                                                                         | -3.7661200 | 1.1981040  | 0.0001030  | 7                                                                                                                                          | -7.8619460 | 0.0107180  | -0.0095370 |
| 6                                                                                                                                         | -2.3804870 | 1.1214540  | -0.0001690 | 6                                                                                                                                          | 5.6845220  | -0.0010660 | -0.0008390 |
| 7                                                                                                                                         | -1.7072830 | -0.0260550 | -0.0003020 | 6                                                                                                                                          | 4.9808410  | 1.1923940  | -0.0018920 |
| 6                                                                                                                                         | -2.4166790 | -1.1516820 | -0.0001620 | 6                                                                                                                                          | 3.5939050  | 1.1419960  | -0.0041930 |
| 6                                                                                                                                         | -3.8041680 | -1.1842110 | 0.0001100  | 7                                                                                                                                          | 2.8990760  | 0.0074240  | -0.0054460 |
| 1                                                                                                                                         | -5.5738760 | 0.0355070  | 0.0004580  | 6                                                                                                                                          | 3.5869700  | -1.1313440 | -0.0043890 |
| 1                                                                                                                                         | -4.2576540 | 2.1605340  | 0.0002030  | 6                                                                                                                                          | 4.9735480  | -1.1902150 | -0.0021000 |
| 1                                                                                                                                         | -1.7835990 | 2.0261780  | -0.0002830 | 1                                                                                                                                          | 6.7661610  | -0.0043900 | 0.0009440  |
| 1                                                                                                                                         | -1.8487260 | -2.0747860 | -0.0002740 | 1                                                                                                                                          | 5.4905680  | 2.1453030  | -0.0009510 |
| 1                                                                                                                                         | -4.3261020 | -2.1304660 | 0.0002130  | 1                                                                                                                                          | 3.0141370  | 2.0577500  | -0.0050990 |
|                                                                                                                                           |            |            |            | 1                                                                                                                                          | 3.0016420  | -2.0435720 | -0.0054450 |
|                                                                                                                                           |            |            |            | 1                                                                                                                                          | 5.4774530  | -2.1462220 | -0.0013290 |

**Table S8:** Cartesian coordinates in (Å) and energy data (a.u.) of halogen bonded HCN, H<sub>2</sub>O and (CH<sub>3</sub>)<sub>2</sub>O complexes at M06-2X/aug-cc-pVTZ level of theory. All the optimized structures are corresponding to minima on the potential energy surface.

|                                                                                                                                                                                                                                                                   |            |            |            |                                                                                                                                                                                                                                                                                     |            |            |            |
|-------------------------------------------------------------------------------------------------------------------------------------------------------------------------------------------------------------------------------------------------------------------|------------|------------|------------|-------------------------------------------------------------------------------------------------------------------------------------------------------------------------------------------------------------------------------------------------------------------------------------|------------|------------|------------|
| <p style="text-align: center;"><b>HCN...BrCHCH<sub>2</sub></b></p> 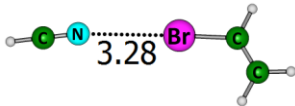 <p style="text-align: center;">SCF E= -2745.6441<br/>ZPE= -2745.5843<br/>G= -2745.6192<br/>H= -2745.5755</p> |            |            |            | <p style="text-align: center;"><b>HCN...Br<sub>2</sub></b></p>  <p style="text-align: center;">SCF E= -5241.9007<br/>ZPE= -5241.8826<br/>G= -5241.9100<br/>H= -5241.8752</p>                      |            |            |            |
| 35                                                                                                                                                                                                                                                                | -0.2988110 | -0.1943310 | -0.0000160 | 35                                                                                                                                                                                                                                                                                  | 1.9337420  | 0.0002770  | 0.0000260  |
| 6                                                                                                                                                                                                                                                                 | -2.1820170 | -0.2923540 | 0.0002250  | 35                                                                                                                                                                                                                                                                                  | -0.3605720 | -0.0004230 | -0.0000650 |
| 6                                                                                                                                                                                                                                                                 | -2.9628880 | 0.7695960  | -0.0000010 | 1                                                                                                                                                                                                                                                                                   | -5.4939080 | 0.0010620  | -0.0003980 |
| 1                                                                                                                                                                                                                                                                 | -4.0372150 | 0.6418660  | 0.0001490  | 6                                                                                                                                                                                                                                                                                   | -4.4271670 | 0.0007290  | -0.0001510 |
| 1                                                                                                                                                                                                                                                                 | -2.5655820 | 1.7746450  | -0.0003440 | 7                                                                                                                                                                                                                                                                                   | -3.2862920 | -0.0000480 | 0.0003810  |
| 1                                                                                                                                                                                                                                                                 | -2.5523710 | -1.3062170 | 0.0005520  |                                                                                                                                                                                                                                                                                     |            |            |            |
| 1                                                                                                                                                                                                                                                                 | 5.1307810  | 0.5375390  | 0.0016320  |                                                                                                                                                                                                                                                                                     |            |            |            |
| 6                                                                                                                                                                                                                                                                 | 4.0890920  | 0.3082740  | 0.0005590  |                                                                                                                                                                                                                                                                                     |            |            |            |
| 7                                                                                                                                                                                                                                                                 | 2.9739490  | 0.0629500  | -0.0008750 |                                                                                                                                                                                                                                                                                     |            |            |            |
| <p style="text-align: center;"><b>HCN...BrF</b></p>  <p style="text-align: center;">SCF E= -2767.4602<br/>ZPE= -2767.4407<br/>G= -2767.4654<br/>H= -2767.4340</p>              |            |            |            | <p style="text-align: center;"><b>HCN...BrCH<sub>2</sub>CH<sub>2</sub>Br</b></p>  <p style="text-align: center;">SCF E= -5320.5227<br/>ZPE= -5320.4482<br/>G= -5320.4378<br/>H= -5320.4879</p> |            |            |            |
| 35                                                                                                                                                                                                                                                                | -0.5074360 | -0.0002480 | 0.0000000  | 35                                                                                                                                                                                                                                                                                  | 1.4346670  | 0.3000500  | -0.0060920 |
| 9                                                                                                                                                                                                                                                                 | -2.2795570 | 0.0009320  | -0.0000010 | 6                                                                                                                                                                                                                                                                                   | -0.4666570 | 0.7225570  | 0.0098280  |
| 1                                                                                                                                                                                                                                                                 | 4.2947210  | 0.0033570  | 0.0000140  | 1                                                                                                                                                                                                                                                                                   | -0.6586980 | 1.2944160  | 0.9111590  |
| 6                                                                                                                                                                                                                                                                 | 3.2274940  | 0.0009760  | -0.0000040 | 1                                                                                                                                                                                                                                                                                   | -0.6661870 | 1.3317270  | -0.8650280 |
| 7                                                                                                                                                                                                                                                                 | 2.0880840  | -0.0012740 | 0.0000010  | 6                                                                                                                                                                                                                                                                                   | -1.2497860 | -0.5627110 | -0.0138150 |
|                                                                                                                                                                                                                                                                   |            |            |            | 1                                                                                                                                                                                                                                                                                   | -1.0650920 | -1.1345900 | -0.9163750 |
|                                                                                                                                                                                                                                                                   |            |            |            | 1                                                                                                                                                                                                                                                                                   | -1.0559050 | -1.1729490 | 0.8612470  |
|                                                                                                                                                                                                                                                                   |            |            |            | 35                                                                                                                                                                                                                                                                                  | -3.1600540 | -0.1523830 | 0.0042630  |
|                                                                                                                                                                                                                                                                   |            |            |            | 1                                                                                                                                                                                                                                                                                   | 6.8480880  | -0.6189440 | 0.0403610  |

|                                                                                     |            |            |            |                                                                                      |            |            |            |
|-------------------------------------------------------------------------------------|------------|------------|------------|--------------------------------------------------------------------------------------|------------|------------|------------|
|                                                                                     |            |            |            | 6                                                                                    | 5.7872510  | -0.5107180 | 0.0174820  |
|                                                                                     |            |            |            | 7                                                                                    | 4.6516430  | -0.3946840 | -0.0069030 |
| <b>HCN...BrCNBeCl<sub>2</sub></b>                                                   |            |            |            | <b>HCN...ClOCl</b>                                                                   |            |            |            |
| 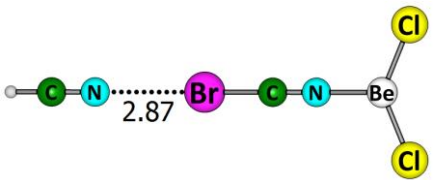   |            |            |            |    |            |            |            |
| SCF E= -3695.8367<br>ZPE= -3695.8037<br>G= -3695.8457<br>H= -3695.7916              |            |            |            | SCF E= -1088.93601655<br>ZPE= -1088.914193<br>G= -1088.948152<br>H= -1088.905921     |            |            |            |
| 6                                                                                   | 0.0474070  | -0.0000890 | 0.0000240  | 8                                                                                    | -1.4571230 | 0.8057760  | -0.0018740 |
| 7                                                                                   | -1.0945770 | 0.0000410  | -0.0001250 | 17                                                                                   | -2.4237180 | -0.5718820 | 0.0000270  |
| 4                                                                                   | -2.8155320 | 0.0000350  | -0.0003680 | 17                                                                                   | 0.1878860  | 0.4236020  | 0.0006950  |
| 17                                                                                  | -3.5324370 | 1.7222330  | -0.0005540 | 1                                                                                    | 5.0627990  | -0.6566880 | -0.0073440 |
| 17                                                                                  | -3.5324550 | -1.7221530 | -0.0003950 | 6                                                                                    | 4.0272720  | -0.3994880 | -0.0022810 |
| 35                                                                                  | 1.8269990  | -0.0000890 | 0.0002410  | 7                                                                                    | 2.9199560  | -0.1245470 | 0.0033930  |
| 1                                                                                   | 6.9043270  | 0.0003130  | 0.0019920  |                                                                                      |            |            |            |
| 6                                                                                   | 5.8365570  | 0.0001840  | 0.0003800  |                                                                                      |            |            |            |
| 7                                                                                   | 4.6963240  | 0.0000630  | 0.0008010  |                                                                                      |            |            |            |
| <b>HCN...ClOCHCl<sub>2</sub></b>                                                    |            |            |            | <b>HCN...ClCNBeCl<sub>2</sub></b>                                                    |            |            |            |
|  |            |            |            |  |            |            |            |
| SCF E= -1587.9101<br>ZPE= -1587.8683<br>G= -1587.9067<br>H= -1587.8580              |            |            |            | SCF E= -1581.7982<br>ZPE= -1581.7647<br>G= -1581.8060<br>H= -1581.7527               |            |            |            |
| 8                                                                                   | 0.6668310  | 0.0001450  | 1.3726270  | 6                                                                                    | -0.5142910 | -0.0000560 | -0.0002200 |
| 6                                                                                   | 1.6436870  | 0.0000010  | 0.4158310  | 7                                                                                    | 0.6272230  | -0.0000240 | 0.0002430  |
| 1                                                                                   | 2.5799920  | 0.0000060  | 0.9620430  | 4                                                                                    | 2.3516630  | -0.0000550 | 0.0001470  |
| 17                                                                                  | 1.6165070  | -1.4589070 | -0.6070390 | 17                                                                                   | 3.0623150  | -1.7237670 | 0.0002270  |
| 17                                                                                  | 1.6166550  | 1.4586940  | -0.6073390 | 17                                                                                   | 3.0625410  | 1.7234850  | 0.0002280  |
|                                                                                     |            |            |            | 17                                                                                   | -2.1313040 | 0.0006640  | -0.0012000 |

|                                                                                     |            |            |            |                                                                                       |            |            |            |
|-------------------------------------------------------------------------------------|------------|------------|------------|---------------------------------------------------------------------------------------|------------|------------|------------|
| 17                                                                                  | -0.9127440 | 0.0001800  | 0.7757630  | 1                                                                                     | -7.1760780 | -0.0004080 | 0.0034880  |
| 1                                                                                   | -5.4363730 | -0.0004750 | -1.2843680 | 6                                                                                     | -6.1084670 | -0.0004400 | 0.0006670  |
| 6                                                                                   | -4.5147020 | -0.0001810 | -0.7470080 | 7                                                                                     | -4.9678530 | -0.0003900 | 0.0006000  |
| 7                                                                                   | -3.5284690 | 0.0001340  | -0.1735960 |                                                                                       |            |            |            |
| <b>H<sub>2</sub>O...BrOF</b>                                                        |            |            |            | <b>H<sub>2</sub>O...BrC<sub>6</sub>H<sub>4</sub>Cl</b>                                |            |            |            |
| 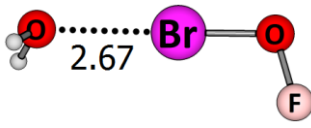   |            |            |            |    |            |            |            |
| SCF E= -2825.5752<br>ZPE= -2825.5467<br>G= -2825.5786<br>H= -2825.5387              |            |            |            | SCF E= -2825.5786<br>ZPE= -3341.8072<br>G= -3341.8472<br>H= -3341.7950                |            |            |            |
| 35                                                                                  | 0.1492100  | -0.1802190 | 0.0016050  | 35                                                                                    | -2.0357950 | -0.0794010 | -0.0012530 |
| 8                                                                                   | -1.6456350 | -0.4955010 | -0.0002370 | 6                                                                                     | -0.1443250 | -0.0342900 | -0.0005070 |
| 9                                                                                   | -2.2785310 | 0.7598320  | -0.0035200 | 6                                                                                     | 0.5669600  | -1.2242380 | 0.0001240  |
| 8                                                                                   | 2.7866200  | 0.2435640  | 0.0023510  | 6                                                                                     | 0.5142690  | 1.1852840  | -0.0008290 |
| 1                                                                                   | 3.0726390  | 0.7811160  | 0.7453110  | 6                                                                                     | 1.9531830  | -1.1946490 | 0.0003920  |
| 1                                                                                   | 3.0839150  | 0.7035600  | -0.7867150 | 1                                                                                     | 0.0426290  | -2.1688790 | 0.0003710  |
|                                                                                     |            |            |            | 6                                                                                     | 1.9005260  | 1.2164770  | -0.0005510 |
|                                                                                     |            |            |            | 1                                                                                     | -0.0502760 | 2.1063980  | -0.0013430 |
|                                                                                     |            |            |            | 6                                                                                     | 2.6079930  | 0.0257350  | 0.0000280  |
|                                                                                     |            |            |            | 1                                                                                     | 2.5231420  | -2.1124570 | 0.0008410  |
|                                                                                     |            |            |            | 1                                                                                     | 2.4302330  | 2.1580540  | -0.0008220 |
|                                                                                     |            |            |            | 17                                                                                    | 4.3454400  | 0.0632600  | 0.0002680  |
|                                                                                     |            |            |            | 8                                                                                     | -5.1729560 | 0.0733810  | 0.0049780  |
|                                                                                     |            |            |            | 1                                                                                     | -5.2980680 | 0.6405010  | -0.7590480 |
|                                                                                     |            |            |            | 1                                                                                     | -5.2752820 | 0.6470490  | 0.7675560  |
| <b>H<sub>2</sub>O...BrOCl</b>                                                       |            |            |            | <b>H<sub>2</sub>O...BrOCCl<sub>3</sub></b>                                            |            |            |            |
|  |            |            |            |  |            |            |            |
| SCF E= -3185.9931<br>ZPE= -3185.9658<br>G= -3185.9997<br>H= -3185.9658              |            |            |            | SCF E= -4144.5657<br>ZPE= -4144.5288<br>G= -4144.5676<br>H= -4144.5172                |            |            |            |

|                                                                                     |            |            |            |                                                                                       |            |            |            |
|-------------------------------------------------------------------------------------|------------|------------|------------|---------------------------------------------------------------------------------------|------------|------------|------------|
| 35                                                                                  | 0.5117450  | 0.2296880  | 0.0017210  | 35                                                                                    | -1.5086040 | -0.0047550 | -0.4204510 |
| 8                                                                                   | -1.2445040 | 0.7658880  | -0.0008130 | 8                                                                                     | 0.2407040  | -0.0006680 | -0.9931080 |
| 17                                                                                  | -2.3248190 | -0.5195980 | -0.0016340 | 6                                                                                     | 1.1966410  | 0.0010260  | -0.0327800 |
| 8                                                                                   | 3.1120900  | -0.4266350 | 0.0021110  | 17                                                                                    | 1.1159470  | 1.4513600  | 1.0135110  |
| 1                                                                                   | 3.3265110  | -0.9973180 | 0.7444870  | 17                                                                                    | 1.1223730  | -1.4507120 | 1.0119340  |
| 1                                                                                   | 3.3436360  | -0.9226040 | -0.7873450 | 17                                                                                    | 2.7353890  | 0.0048930  | -0.9115380 |
|                                                                                     |            |            |            | 8                                                                                     | -4.0429080 | -0.0027660 | 0.2851190  |
|                                                                                     |            |            |            | 1                                                                                     | -4.2376460 | -0.7162430 | 0.8984330  |
|                                                                                     |            |            |            | 1                                                                                     | -4.2764920 | 0.8098080  | 0.7415190  |
| <b>H<sub>2</sub>O...BrOCF<sub>3</sub></b>                                           |            |            |            | <b>H<sub>2</sub>O...FOCl</b>                                                          |            |            |            |
| 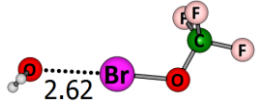   |            |            |            |    |            |            |            |
| SCF E= -3063.5405<br>ZPE= -3063.4974<br>G= -3063.5335<br>H= -3063.4873              |            |            |            | SCF E= -711.5264<br>ZPE= -711.4976<br>G= -711.5290<br>H= -711.4896                    |            |            |            |
| 35                                                                                  | 0.9909290  | -0.2620150 | -0.0039120 | 17                                                                                    | -0.1508650 | -0.2589730 | -0.0042590 |
| 8                                                                                   | -0.7372760 | -0.8853760 | -0.0250950 | 8                                                                                     | 1.4946990  | -0.5544220 | 0.0002820  |
| 6                                                                                   | -1.6764530 | 0.0834960  | 0.0011180  | 9                                                                                     | 2.1250710  | 0.7010530  | 0.0045780  |
| 9                                                                                   | -1.5982930 | 0.8488830  | 1.0901520  | 8                                                                                     | -2.7938370 | 0.1527770  | -0.0038220 |
| 9                                                                                   | -1.6093500 | 0.8947450  | -1.0550760 | 1                                                                                     | -3.0814860 | 0.7058600  | -0.7341290 |
| 9                                                                                   | -2.8584130 | -0.5153750 | -0.0059250 | 1                                                                                     | -3.0863430 | 0.6003680  | 0.7936470  |
| 8                                                                                   | 3.4876970  | 0.5279990  | 0.0166290  |                                                                                       |            |            |            |
| 1                                                                                   | 3.9583200  | 0.3217710  | -0.7951210 |                                                                                       |            |            |            |
| 1                                                                                   | 4.0090410  | 0.1525270  | 0.7306970  |                                                                                       |            |            |            |
| <b>H<sub>2</sub>O...ClF</b>                                                         |            |            |            | <b>H<sub>2</sub>O...ClOBr<sub>3</sub></b>                                             |            |            |            |
|  |            |            |            |  |            |            |            |
| SCF E= -636.4104<br>ZPE= -636.3846<br>G= -636.4122<br>H= -636.3780                  |            |            |            | SCF E= -8372.6131<br>ZPE= -8372.5775<br>G= -8372.5653<br>H= -8372.6184                |            |            |            |

|                                                                                   |            |            |            |                                                                                    |            |            |            |
|-----------------------------------------------------------------------------------|------------|------------|------------|------------------------------------------------------------------------------------|------------|------------|------------|
| 9                                                                                 | -1.9566040 | 0.0000100  | 0.0247810  | 8                                                                                  | -0.4084490 | -0.0015510 | 1.2989400  |
| 17                                                                                | -0.3195280 | -0.0000100 | -0.0156210 | 6                                                                                  | 0.3776850  | -0.0001830 | 0.1854050  |
| 8                                                                                 | 2.2368020  | 0.0000000  | -0.0898600 | 35                                                                                 | 2.1799500  | -0.0252400 | 0.8917440  |
| 1                                                                                 | 2.5734420  | 0.7666330  | 0.3806880  | 35                                                                                 | 0.0895140  | -1.5807320 | -0.9346370 |
| 1                                                                                 | 2.5735550  | -0.7665540 | 0.3807330  | 35                                                                                 | 0.1203020  | 1.6039350  | -0.9073930 |
|                                                                                   |            |            |            | 17                                                                                 | -2.0782360 | 0.0106450  | 1.0038240  |
|                                                                                   |            |            |            | 8                                                                                  | -4.6846270 | 0.0047740  | 0.5743940  |
|                                                                                   |            |            |            | 1                                                                                  | -4.9070000 | 0.6907070  | -0.0598710 |
|                                                                                   |            |            |            | 1                                                                                  | -4.9262980 | -0.8250420 | 0.1557980  |
| <b>(CH<sub>3</sub>)<sub>2</sub>O...BrCCH</b>                                      |            |            |            | <b>(CH<sub>3</sub>)<sub>2</sub>O...BrC<sub>6</sub>H<sub>4</sub>F</b>               |            |            |            |
| 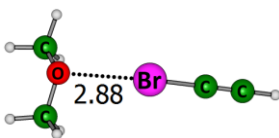 |            |            |            |  |            |            |            |
| SCF E= -2805.9811<br>ZPE= -2805.8801<br>G= -2805.9158<br>H= -2805.8701            |            |            |            | SCF E= -3060.1364<br>ZPE= -3059.9719<br>G= -3060.0157<br>H= -3059.9582             |            |            |            |
| 35                                                                                | -0.6587840 | -0.0000430 | -0.1934260 | 35                                                                                 | 0.8418260  | -0.0862600 | -0.2255540 |
| 6                                                                                 | -2.4230220 | -0.0000400 | 0.1508520  | 6                                                                                  | -1.0463820 | -0.0372460 | -0.0993910 |
| 6                                                                                 | -3.5974660 | 0.0000390  | 0.3797650  | 6                                                                                  | -1.7518510 | -1.2094980 | 0.1269730  |
| 1                                                                                 | -4.6401740 | 0.0001040  | 0.5825980  | 6                                                                                  | -1.7081710 | 1.1744300  | -0.2296330 |
| 8                                                                                 | 2.2071840  | 0.0000010  | -0.4213270 | 6                                                                                  | -3.1349180 | -1.1721890 | 0.2267890  |
| 6                                                                                 | 2.5373020  | -1.1665470 | 0.2936590  | 1                                                                                  | -1.2246970 | -2.1472570 | 0.2261530  |
| 1                                                                                 | 2.0013820  | -1.2045120 | 1.2488350  | 6                                                                                  | -3.0909030 | 1.2179000  | -0.1305190 |
| 1                                                                                 | 2.2446210  | -2.0194440 | -0.3138900 | 1                                                                                  | -1.1473290 | 2.0804340  | -0.4076340 |
| 1                                                                                 | 3.6132800  | -1.2133250 | 0.4905770  | 6                                                                                  | -3.7779080 | 0.0423750  | 0.0968720  |
| 6                                                                                 | 2.5369760  | 1.1666900  | 0.2935870  | 1                                                                                  | -3.7122060 | -2.0680160 | 0.4049940  |
| 1                                                                                 | 2.0001650  | 1.2051370  | 1.2482400  | 1                                                                                  | -3.6351260 | 2.1464050  | -0.2262560 |
| 1                                                                                 | 3.6127810  | 1.2131980  | 0.4915290  | 9                                                                                  | -5.1158380 | 0.0820340  | 0.1961680  |
| 1                                                                                 | 2.2451580  | 2.0194720  | -0.3145320 | 8                                                                                  | 3.8222940  | 0.0449850  | 0.0015240  |
|                                                                                   |            |            |            | 6                                                                                  | 4.0674350  | 0.4037750  | 1.3379910  |
|                                                                                   |            |            |            | 1                                                                                  | 4.6664590  | 1.3192870  | 1.3954930  |
|                                                                                   |            |            |            | 1                                                                                  | 3.1041680  | 0.5738720  | 1.8137100  |
|                                                                                   |            |            |            | 1                                                                                  | 4.5963810  | -0.3953670 | 1.8688250  |
|                                                                                   |            |            |            | 6                                                                                  | 5.0088180  | -0.2107870 | -0.7054090 |
|                                                                                   |            |            |            | 1                                                                                  | 5.6532950  | 0.6749790  | -0.7255990 |
|                                                                                   |            |            |            | 1                                                                                  | 5.5658780  | -1.0378280 | -0.2514680 |
|                                                                                   |            |            |            | 1                                                                                  | 4.7367520  | -0.4781590 | -1.7235840 |



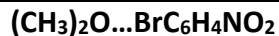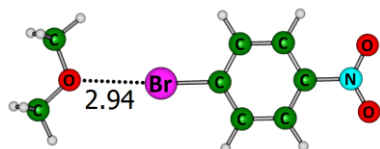

SCF E= -3165.3980  
ZPE= -3165.2223  
G= -3165.2689  
H= -3165.2069

|    |            |            |            |
|----|------------|------------|------------|
| 35 | -1.5193260 | -0.1087210 | -0.0296230 |
| 6  | 0.3660620  | -0.0573480 | -0.0139010 |
| 6  | 1.0165560  | 1.1697780  | -0.0037990 |
| 6  | 1.0809470  | -1.2485140 | -0.0137110 |
| 6  | 2.4001770  | 1.2089070  | 0.0067280  |
| 1  | 0.4434500  | 2.0851290  | -0.0043740 |
| 6  | 2.4646260  | -1.2141040 | -0.0030620 |
| 1  | 0.5568380  | -2.1927870 | -0.0222200 |
| 6  | 3.0982750  | 0.0150500  | 0.0069840  |
| 1  | 2.9389890  | 2.1438960  | 0.0147270  |
| 1  | 3.0522800  | -2.1193320 | -0.0026840 |
| 7  | 4.5707610  | 0.0535720  | 0.0186230  |
| 8  | 5.1578580  | -1.0054260 | 0.0200690  |
| 8  | 5.1022890  | 1.1414880  | 0.0260220  |
| 8  | -4.4536030 | -0.0088130 | -0.0817720 |
| 6  | -5.4632640 | -0.9713920 | 0.0902080  |
| 1  | -6.2456820 | -0.8581090 | -0.6677850 |
| 1  | -5.0056880 | -1.9524270 | -0.0118090 |
| 1  | -5.9210730 | -0.8870590 | 1.0816780  |
| 6  | -4.9452630 | 1.3030680  | 0.0334760  |
| 1  | -5.7038750 | 1.5058620  | -0.7300620 |
| 1  | -5.3878690 | 1.4713960  | 1.0211810  |
| 1  | -4.1073420 | 1.9829790  | -0.1043110 |

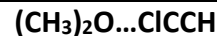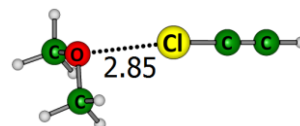

SCF E= -691.9442  
ZPE= -691.8426  
G= -691.8776  
H= -691.8327

|    |            |            |            |
|----|------------|------------|------------|
| 17 | -0.8781550 | -0.0000950 | -0.2847180 |
| 6  | -2.4844990 | -0.0001110 | 0.0571410  |
| 6  | -3.6539030 | 0.0000560  | 0.3049370  |
| 1  | -4.6927090 | 0.0002380  | 0.5241170  |
| 8  | 1.9641020  | 0.0000070  | -0.4713770 |
| 6  | 2.2404640  | -1.1651550 | 0.2659490  |
| 1  | 1.6414730  | -1.1996370 | 1.1831310  |
| 1  | 1.9867240  | -2.0188070 | -0.3578850 |
| 1  | 3.3004110  | -1.2162850 | 0.5368510  |
| 6  | 2.2400720  | 1.1653240  | 0.2658550  |
| 1  | 1.6412050  | 1.1996010  | 1.1831230  |
| 1  | 3.3000400  | 1.2169230  | 0.5365880  |
| 1  | 1.9858750  | 2.0188390  | -0.3579800 |

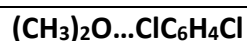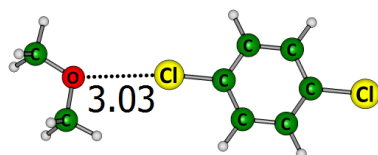

SCF E= -1306.4604  
ZPE= -1306.2970  
G= -1306.3409  
H= -1306.2830

|    |            |            |            |
|----|------------|------------|------------|
| 6  | -0.3577190 | -0.1496300 | -0.0000730 |
| 6  | -1.1198630 | -1.3076160 | 0.0001450  |
| 6  | -0.9629680 | 1.0971430  | -0.0002650 |
| 6  | -2.5030200 | -1.2180890 | 0.0001700  |
| 1  | -0.6319440 | -2.2715590 | 0.0002560  |
| 6  | -2.3460280 | 1.1884030  | -0.0002000 |
| 1  | -0.3548390 | 1.9901860  | -0.0004330 |
| 6  | -3.1047150 | 0.0294170  | 0.0000240  |
| 1  | -3.1120560 | -2.1104790 | 0.0002660  |
| 1  | -2.8342910 | 2.1520730  | -0.0003020 |
| 17 | -4.8387460 | 0.1420880  | 0.0000410  |
| 17 | 1.3728420  | -0.2640180 | -0.0000640 |
| 8  | 4.3989950  | -0.0796270 | 0.0002220  |
| 6  | 4.6101060  | 1.3086710  | 0.0003920  |
| 1  | 5.1672500  | 1.6228710  | -0.8894000 |
| 1  | 3.6343400  | 1.7891970  | 0.0004270  |
| 1  | 5.1672290  | 1.6226860  | 0.8902560  |
| 6  | 5.6055260  | -0.7977170 | -0.0003590 |
| 1  | 6.2016100  | -0.5657850 | -0.8901430 |
| 1  | 6.2024540  | -0.5657650 | 0.8888690  |
| 1  | 5.3607230  | -1.8570770 | -0.0001950 |

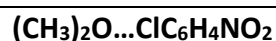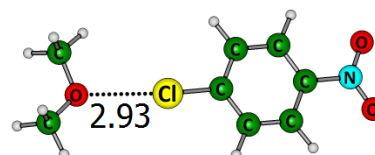

SCF E= -1051.3632  
ZPE= -1051.1873  
G= -1051.2339  
H= 1051.1720

|    |            |            |            |
|----|------------|------------|------------|
| 17 | -1.6854060 | -0.1630270 | -0.0390060 |
| 6  | 0.0416420  | -0.0971600 | -0.0223400 |
| 6  | 0.6775250  | 1.1372280  | -0.0064510 |
| 6  | 0.7679340  | -1.2811210 | -0.0254220 |
| 6  | 2.0599950  | 1.1908810  | 0.0068190  |
| 1  | 0.0898320  | 2.0432640  | -0.0046140 |
| 6  | 2.1504750  | -1.2316330 | -0.0119810 |
| 1  | 0.2486140  | -2.2279030 | -0.0386460 |
| 6  | 2.7710350  | 0.0043920  | 0.0039960  |
| 1  | 2.5890660  | 2.1313310  | 0.0195170  |
| 1  | 2.7481700  | -2.1302520 | -0.0138330 |
| 7  | 4.2425540  | 0.0585000  | 0.0190010  |
| 8  | 4.8408020  | -0.9942640 | 0.0190510  |
| 8  | 4.7626060  | 1.1519480  | 0.0303950  |
| 8  | -4.6137000 | -0.0560020 | -0.0841050 |
| 6  | -5.6850260 | -0.9467930 | 0.0949300  |
| 1  | -6.4564300 | -0.7934790 | -0.6677000 |
| 1  | -5.2922440 | -1.9568810 | 0.0075570  |
| 1  | -6.1409900 | -0.8211980 | 1.0831420  |
| 6  | -5.0175990 | 1.2859140  | 0.0125320  |
| 1  | -5.7589210 | 1.5302620  | -0.7563660 |
| 1  | -5.4512770 | 1.4970540  | 0.9963310  |
| 1  | -4.1353490 | 1.9060570  | -0.1305020 |

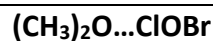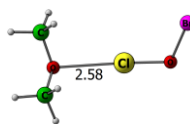

SCF E= -3264.5753  
ZPE= -3264.4895

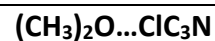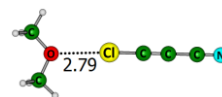

SCF E= -784.1916  
ZPE= -784.0905

| G= -3264.5271<br>H= -3264.4791 |            |            |            | G= -784.1308<br>H= -784.0786 |            |            |            |
|--------------------------------|------------|------------|------------|------------------------------|------------|------------|------------|
| 8                              | 1.1843370  | -1.0427280 | -0.3506000 | 6                            | -1.6001990 | 0.0465540  | -0.0207430 |
| 35                             | 2.2768890  | 0.3171410  | 0.1776160  | 6                            | -2.7992460 | 0.0175160  | -0.0005580 |
| 17                             | -0.4473520 | -0.6060190 | -0.4014490 | 6                            | -4.1742810 | -0.0163820 | 0.0236760  |
| 8                              | -2.9615740 | -0.0171220 | -0.3401130 | 7                            | -5.3234910 | -0.0456740 | 0.0444990  |
| 6                              | -3.4056550 | -0.6053690 | 0.8610410  | 17                           | 0.0274790  | 0.0868470  | -0.0455490 |
| 1                              | -4.4440780 | -0.3286960 | 1.0675860  | 8                            | 2.8180720  | 0.0308310  | -0.0763530 |
| 1                              | -3.3342770 | -1.6836860 | 0.7429820  | 6                            | 3.4132380  | -1.2387740 | 0.0401190  |
| 1                              | -2.7782980 | -0.2927180 | 1.7023780  | 1                            | 3.8822360  | -1.3635220 | 1.0216170  |
| 6                              | -2.9857760 | 1.3904420  | -0.2846750 | 1                            | 2.6302390  | -1.9840850 | -0.0799660 |
| 1                              | -4.0042180 | 1.7546410  | -0.1179100 | 1                            | 4.1728290  | -1.3874010 | -0.7341240 |
| 1                              | -2.3392220 | 1.7592360  | 0.5189120  | 6                            | 3.7563480  | 1.0708260  | 0.0566790  |
| 1                              | -2.6195570 | 1.7619890  | -1.2383760 | 1                            | 4.2447900  | 1.0341090  | 1.0360550  |
|                                |            |            |            | 1                            | 4.5237560  | 1.0056790  | -0.7215330 |
|                                |            |            |            | 1                            | 3.2237030  | 2.0134430  | -0.0434260 |
